# Supplementary material for: Network Analysis of the Potential Role of DNA Methylation in the Relationship between Plasma Carotenoids and Lipid Profile
Source: MDPI journal article supplement (doi:10.3390/nu11061265), 2019-06-04
Supplement: s1 [file Supplementary Table 1. Concentrations of carotenoids.xlsx]

## Sheet: Feuil1
Supplementary Table S1. Concentrations of plasma carotenoids (µmol/L of plasma)
Subjects	Lutein	Zeaxanthin	β-Cryptoxanthin	α-Carotene	β-Carotene	Lycopene	Total carotenoids
Gen01	0.366896	0.0678172	0.489421	0.948154	1.96626	1.90477	5.74332
Gen02	0.190408	0.0521172	0.267179	0.390468	1.63413	2.97213	5.50643
Gen03	0.205009	0.0470351	0.331277	1.30882	1.97765	2.14359	6.01339
Gen05	0.243825	0.0532297	0.421736	0.803941	2.58467	2.80014	6.90755
Gen06	0.211387	0.0399741	0.472729	0.879871	2.33628	2.28341	6.22365
Gen07	0.153617	0.0383634	0.209386	1.01423	1.62869	1.21588	4.26017
Gen08	0.139509	0.0324533	0.288009	0.564401	1.07092	1.52478	3.62007
Gen09	0.189359	0.0602349	0.241838	0.368897	1.46895	1.84769	4.17697
Gen10	0.455315	0.0536641	0.686503	1.86816	5.09893	1.60505	9.76763
Gen11	0.133017	0.0379158	0.407754	1.17281	1.78868	1.15261	4.69279
Gen12	0.149565	0.0378223	0.525835	1.20447	2.13196	1.51354	5.56319
Gen13	0.220802	0.0460584	0.403703	1.95125	4.3647	1.77749	8.76401
Gen14	0.1944	0.0346023	0.47241	1.69429	2.77309	1.17814	6.34693
Gen15	0.314569	0.0790616	0.642073	0.585099	1.263	2.07401	4.95781
Gen16	0.209415	0.0590733	0.665097	0.434775	1.21774	1.90799	4.4941
Gen17	0.316597	0.0582473	0.437263	3.07504	4.90271	1.52412	10.314
Gen18	0.407204	0.0687961	0.52898	1.77242	2.73849	1.40131	6.9172
Gen19	0.214061	0.0433458	0.213027	1.46074	2.3908	0.814169	5.13614
Gen20	0.389533	0.115184	0.545115	0.585997	1.94028	1.46288	5.03898
Gen21	0.258235	0.0561423	0.551572	3.29452	4.10489	1.59654	9.8619
Gen22	0.196375	0.0517825	0.520291	1.43217	2.81825	1.43588	6.45475
Gen23	0.19796	0.0340003	0.363063	0.625727	1.36047	1.52337	4.1046
Gen24	0.233603	0.0507641	0.420626	1.11325	1.89522	1.31461	5.02808
Gen25	0.190126	0.0645595	0.730735	0.681446	1.40989	0.830911	3.90767
Gen26	0.206738	0.0447216	0.116429	0.103312	0.301023	0.504814	1.27704
Gen27	0.233246	0.0713305	0.537239	0.383616	0.773812	0.770333	2.76958
Gen28	0.228586	0.0670334	0.401644	0.34477	0.578812	0.695899	2.31675
Gen29	0.2257	0.0628822	0.19197	0.799444	1.42605	1.67944	4.38549
Gen30	0.188469	0.0511152	0.184494	1.76126	3.75436	1.36074	7.30044
Gen31	0.103495	0.0363976	0.237723	0.553248	1.51239	1.61846	4.06171
Gen32	0.137936	0.0503758	0.585621	1.28099	2.66909	1.96598	6.68998
Gen33	0.348636	0.0687223	0.590453	1.05183	2.84423	1.16549	6.06936
Gen34	0.34081	0.0820074	0.531324	0.878111	3.02915	1.32129	6.18268
Gen35	0.185585	0.0563798	0.694893	1.20488	2.06864	1.1017	5.31208
Gen36	0.215592	0.101676	0.827017	2.65607	4.85041	1.40831	10.0591
Gen38	0.267061	0.0920902	.	3.55026	6.33804	1.79779	12.0452
Gen39	0.26395	0.0646388	0.536496	1.52283	3.89619	1.72663	8.01074
Gen40	0.220082	0.0433432	0.450422	1.29773	3.99433	2.71061	8.71652
Gen41	0.337892	0.0895038	0.403161	2.05426	3.12184	1.53282	7.53948
Gen42	0.165965	0.0591057	0.431076	0.742322	1.3694	1.38768	4.15555
Gen43	0.18579	0.0581758	0.65377	0.91846	2.08513	1.28347	5.18479
Gen44	0.264943	0.0929796	0.900397	1.52574	3.79402	2.5744	9.15248
Gen45	0.495216	0.0546862	0.358577	1.28193	3.42958	1.5893	7.20928
Gen46	0.72654	0.0919627	0.47041	1.08467	1.94897	1.42895	5.7515
Gen47	0.584823	0.0606608	0.400819	1.18039	2.54238	1.59877	6.36784
Gen48	0.555551	0.0759974	0.554549	0.911234	1.78156	1.21367	5.09256
Gen49	0.217257	0.0576166	0.428779	0.673976	2.02502	1.58549	4.98814
Gen50	0.220041	0.0399636	0.286557	0.667127	1.28661	1.1807	3.68099
