# Supplementary material for: Network Analysis of the Potential Role of DNA Methylation in the Relationship between Plasma Carotenoids and Lipid Profile
Source: MDPI journal article supplement (doi:10.3390/nu11061265), 2019-06-04
Supplement: s1 [file Supplementary Table 2. Regression 20 687 CpG.xlsx]

## Sheet: Outttt
Supplementary Table S2: CpG sites showing significant association with plasma total carotenoids (n=20 687)
CpG sites	Chromosome	Mapinfo	Gene	Accession	Location
cg00000029	16	53468112	RBL2	NM_005611	TSS1500
cg00001874	10	69990588	ATOH7;ATOH7	NM_145178;NM_145178	1stExon;3'UTR
cg00002597	16	31437783	ITGAD	NM_005353	3'UTR
cg00002660	12	56583610	SMARCC2;SMARCC2;SMARCC2	NM_001130420;NM_003075;NM_139067	TSS1500;TSS1500;TSS1500
cg00002749	17	57839538	TMEM49	NM_030938	Body
cg00004421	17	7475079	EIF4A1;SENP3	NM_001416;NM_015670	TSS1500;3'UTR
cg00005166	16	3264442	OR1F2P	NR_002169	TSS1500
cg00007324	19	4047803	ZBTB7A	NM_015898	Body
cg00007800	1	1838518
cg00008488	5	175199915
cg00010672	2	55281781
cg00012199	14	21151024	ANG;RNASE4	NM_001145;NM_002937	TSS1500;TSS1500
cg00016238	1	244374065
cg00019275	19	35249217	ZNF599	NM_001007248	3'UTR
cg00022858	4	55096616	PDGFRA	NM_006206	5'UTR
cg00024416	22	24240387
cg00026033	12	56414490	IKZF4	NM_022465	TSS200
cg00027155	16	11099199	CLEC16A	NM_015226	Body
cg00027466	1	156269048	VHLL;VHLL	NM_001004319;NM_001004319	5'UTR;1stExon
cg00027570	1	117306669	CD2	NM_001767	Body
cg00028014	2	201601406
cg00028022	1	246984573
cg00028251	6	119397402	FAM184A;FAM184A	NM_001100411;NM_024581	5'UTR;Body
cg00029821	6	147374493
cg00031896	12	122020205	KDM2B	NM_032590	TSS1500
cg00035812	2	204193378	ABI2	NM_005759	Body
cg00035847	1	29557016	MECR;MECR	NM_016011;NM_001024732	Body;5'UTR
cg00037058	2	178977341	RBM45	NM_152945	1stExon
cg00038446	1	172635668	FASLG	NM_000639	3'UTR
cg00040016	17	57833286	TMEM49	NM_030938	Body
cg00041311	16	48402112	SIAH1	NM_003031	5'UTR
cg00042144	1	209958035	C1orf74	NM_152485	TSS200
cg00042325	7	150104655	LOC728743	NR_027237	Body
cg00042568	3	14987939	NR2C2	NM_003298	TSS1500
cg00044050	16	11439710	C16orf75	NM_152308	Body
cg00044466	16	15238525
cg00045061	8	59571437	NSMAF;NSMAF	NM_003580;NM_001144772	Body;Body
cg00045190	6	33216612
cg00045753	9	123630545	PHF19	NM_015651	Body
cg00046802	9	130460675
cg00047532	6	42882406	PTCRA	NM_138296	TSS1500
cg00047843	12	83321412	TMTC2	NM_152588	Body
cg00047844	17	77752442	CBX2;CBX2	NM_005189;NM_032647	Body;Body
cg00050618	16	27414418	IL21R;IL21R	NM_181079;NM_181078	TSS200;5'UTR
cg00051782	3	193859210
cg00053769	16	58783589
cg00054774	21	43373079	C2CD2	NM_015500	Body
cg00055434	1	2415344	PLCH2	NM_014638	Body
cg00055726	9	136445425	FAM163B	NM_001080515	TSS200
cg00059879	15	49534692	GALK2;GALK2	NM_001001556;NM_002044	Body;Body
cg00060287	17	48278086	COL1A1	NM_000088	Body
cg00060956	1	43209576
cg00061695	17	7311314	NLGN2	NM_020795	TSS200
cg00062873	7	124765471
cg00063471	15	51385970	TNFAIP8L3	NM_207381	Body
cg00068153	1	201028602	CACNA1S	NM_000069	Body
cg00068377	1	3275180	PRDM16;PRDM16	NM_022114;NM_199454	Body;Body
cg00069642	5	141062490	ARAP3	NM_022481	TSS1500
cg00069969	13	33646763
cg00071210	6	148736942	SASH1	NM_015278	Body
cg00071250	1	172628263	FASLG;FASLG	NM_000639;NM_000639	1stExon;5'UTR
cg00074365	2	64088479	UGP2;UGP2	NM_001001521;NM_006759	Body;Body
cg00075589	2	219524515	ZNF142;BCS1L;BCS1L	NM_001105537;NM_004328;NM_001079866	TSS1500;5'UTR;5'UTR
cg00075768	13	31040106	HMGB1	NM_002128	TSS200
cg00075844	3	51641812	RAD54L2	NM_015106	Body
cg00076543	6	30227145	HLA-L	NR_027822	TSS200
cg00077017	3	57994273	FLNB;FLNB;FLNB;FLNB;FLNB;FLNB;FLNB;FLNB	NM_001164319;NM_001164317;NM_001164318;NM_001164319;NM_001164318;NM_001164317;NM_001457;NM_001457	1stExon;1stExon;5'UTR;5'UTR;1stExon;5'UTR;1stExon;5'UTR
cg00078456	1	1564422	MIB2;MIB2;MIB2;MIB2;MIB2;MIB2	NM_001170687;NM_001170688;NM_080875;NM_001170689;NM_001170686;NR_033183	Body;Body;Body;Body;Body;Body
cg00080148	22	44205183	EFCAB6;EFCAB6	NM_198856;NM_022785	5'UTR;5'UTR
cg00082384	3	52516316	NISCH	NM_007184	Body
cg00083401	3	51642365	RAD54L2	NM_015106	Body
cg00083659	22	37404577	C22orf33;C22orf33	NM_178552;NM_001163857	TSS1500;TSS1500
cg00084798	8	142841965
cg00088033	17	35969707	SYNRG;SYNRG;SYNRG;SYNRG;SYNRG;SYNRG;SYNRG	NM_001163547;NM_007247;NM_001163545;NM_080550;NM_198882;NM_001163544;NM_001163546	TSS1500;TSS1500;TSS1500;TSS1500;TSS1500;TSS1500;TSS1500
cg00088844	12	52317349
cg00089101	2	98612552	TMEM131	NM_015348	TSS200
cg00089314	5	135169284	LOC153328	NM_145282	TSS1500
cg00089372	1	156469964	MEF2D	NM_005920	5'UTR
cg00090782	10	43248870
cg00090787	15	66795345	RPL4;SNORD16;SNORD18B	NM_000968;NR_002440;NR_002442	Body;TSS200;TSS1500
cg00093095	17	76481380	DNAH17	NM_173628	Body
cg00093099	18	2849071	EMILIN2	NM_032048	Body
cg00093433	16	85981310
cg00095677	17	3833739	ATP2A3;ATP2A3;ATP2A3;ATP2A3;ATP2A3;ATP2A3;ATP2A3	NM_174954;NM_174955;NM_174956;NM_174957;NM_174953;NM_174958;NM_005173	Body;Body;Body;Body;Body;Body;Body
cg00096922	7	96654185	DLX5	NM_005221	TSS200
cg00096979	16	2116141	TSC2;TSC2;TSC2	NM_001077183;NM_000548;NM_001114382	Body;Body;Body
cg00097020	13	64386020
cg00097225	10	65389215
cg00099427	1	159870134	CCDC19	NM_012337	TSS1500
cg00100538	4	184067792	WWC2	NM_024949	Body
cg00101453	22	30685584	GATSL3;GATSL3	NM_001037666;NM_001037666	1stExon;5'UTR
cg00101713	15	32984867	SCG5;SCG5	NM_003020;NM_001144757	Body;Body
cg00102093	1	232345923
cg00102166	1	43425337	SLC2A1	NM_006516	TSS1500
cg00103398	1	173834155	SNORD47;GAS5;SNORD81;SNORD80	NR_002746;NR_002578;NR_003938;NR_003940	TSS1500;Body;TSS1500;TSS200
cg00103448	17	46600533
cg00104562	19	7767229	FCER2	NM_002002	TSS200
cg00104845	5	140892370	PCDHGB5;PCDHGC3;PCDHGA6;PCDHGB4;PCDHGA8;PCDHGA12;PCDHGB3;PCDHGA5;PCDHGA1;PCDHGA11;PCDHGA3;PCDHGA2;PCDHGB6;PCDHGA11;PCDHGC5;PCDHGA4;PCDHGB2;PCDHGA10;PCDHGC4;PCDHGB7;PCDHGA9;PCDHGC3;PCDHGB1;PCDHGA7	NM_018925;NM_002588;NM_018919;NM_003736;NM_032088;NM_003735;NM_018924;NM_018918;NM_018912;NM_032092;NM_018916;NM_018915;NM_018926;NM_018914;NM_018929;NM_018917;NM_018923;NM_018913;NM_018928;NM_018927;NM_018921;NM_032403;NM_018922;NM_018920	3'UTR;3'UTR;3'UTR;3'UTR;3'UTR;3'UTR;3'UTR;3'UTR;3'UTR;3'UTR;3'UTR;3'UTR;3'UTR;3'UTR;3'UTR;3'UTR;3'UTR;3'UTR;3'UTR;3'UTR;3'UTR;3'UTR;3'UTR;3'UTR
cg00106942	12	44200524	TWF1	NM_002822	TSS1500
cg00107241	1	29461070
cg00107782	1	151300621
cg00107916	5	3188066
cg00107970	1	156119457
cg00108716	1	228602400	TRIM17;TRIM17;TRIM17;TRIM17	NM_001024941;NM_001134855;NM_001024940;NM_016102	Body;Body;Body;Body
cg00110171	18	77179806	NFATC1;NFATC1;NFATC1;NFATC1;NFATC1	NM_006162;NM_172388;NM_172389;NM_172387;NM_172390	Body;5'UTR;Body;Body;Body
cg00110609	16	4311799	TFAP4	NM_003223	Body
cg00111978	2	102978529	IL18R1	NM_003855	TSS1500
cg00112091	11	12696280	TEAD1;TEAD1	NM_021961;NM_021961	1stExon;5'UTR
cg00112314	10	134607427
cg00112929	1	158905479	PYHIN1;PYHIN1;PYHIN1;PYHIN1	NM_198930;NM_198928;NM_198929;NM_152501	5'UTR;5'UTR;5'UTR;5'UTR
cg00113020	19	55173482	LILRB4;LILRB4	NM_006847;NM_001081438	TSS1500;TSS1500
cg00114944	6	139350067	C6orf115	NM_021243	5'UTR
cg00115629	3	53164619	RFT1	NM_052859	TSS200
cg00115984	9	32551741	TOPORS	NM_005802	Body
cg00116430	1	94188268
cg00118808	9	132097931
cg00119186	1	158670124	OR6K2	NM_001005279	1stExon
cg00119279	4	174427146
cg00120210	15	85259593	SEC11A;SEC11A	NM_014300;NM_014300	1stExon;5'UTR
cg00120473	4	7330616	SORCS2	NM_020777	Body
cg00121045	16	1416053	UNKL	NM_023076	3'UTR
cg00122347	10	104236741	TMEM180	NM_024789	3'UTR
cg00124993	5	135416412	MIR886	NR_030583	TSS200
cg00127150	22	22862144	ZNF280B	NM_080764	5'UTR
cg00127487	22	29600139
cg00131618	5	37248984	C5orf42	NM_023073	5'UTR
cg00132149	5	1474995	LPCAT1	NM_024830	Body
cg00133136	20	62808983	MYT1	NM_004535	5'UTR
cg00134539	21	43824071	UBASH3A;UBASH3A	NM_001001895;NM_018961	1stExon;1stExon
cg00135888	11	57407543	MIR130A	NR_029673	TSS1500
cg00136173	5	176045746
cg00136279	6	17975832	KIF13A;KIF13A;KIF13A;KIF13A	NM_022113;NM_001105567;NM_001105568;NM_001105566	Body;Body;Body;Body
cg00137209	3	142314968	PLS1	NM_001145319	TSS1500
cg00142482	10	50396833	C10orf128	NM_001010863	TSS1500
cg00145093	10	11027947
cg00146004	16	3241434
cg00146334	22	18110190	ATP6V1E1;ATP6V1E1;ATP6V1E1	NM_001039366;NM_001696;NM_001039367	Body;Body;Body
cg00146864	17	43392332	MAP3K14	NM_003954	5'UTR
cg00146928	12	9269671	A2M	NM_000014	TSS1500
cg00147638	1	25228039	RUNX3;RUNX3	NM_004350;NM_001031680	3'UTR;3'UTR
cg00147751	7	99818709	GATS;GATS;GATS;GATS;PVRIG	NR_028040;NM_178831;NR_028038;NR_028039;NM_024070	Body;3'UTR;Body;Body;Body
cg00150520	1	45082905	RNF220	NM_018150	Body
cg00150989	17	74303935	QRICH2	NM_032134	TSS200
cg00151370	6	16323285	ATXN1;ATXN1	NM_001128164;NM_000332	Body;Body
cg00151768	18	77157760	NFATC1;NFATC1;NFATC1	NM_006162;NM_172388;NM_172390	Body;5'UTR;Body
cg00152047	1	166893354	ILDR2	NM_199351	Body
cg00152117	1	156928845	ARHGEF11;ARHGEF11	NM_014784;NM_198236	Body;Body
cg00152175	16	56459720	AMFR	NM_001144	TSS1500
cg00153934	6	80247286	LCA5;LCA5	NM_181714;NM_001122769	TSS200;TSS200
cg00154119	15	68174054
cg00154366	8	144717893	ZNF623	NM_001082480	TSS1500
cg00157562	7	800728	HEATR2	NM_017802	Body
cg00158530	16	69966973	MIR140;WWP2;WWP2	NR_029681;NM_199424;NM_007014	TSS200;Body;Body
cg00159400	20	5100020	PCNA;PCNA	NM_182649;NM_002592	Body;Body
cg00163018	1	237413813	RYR2	NM_001035	Body
cg00163365	4	84203456	COQ2	NM_015697	Body
cg00163859	8	99917203
cg00164335	22	31503579	SELM	NM_080430	TSS200
cg00167504	7	43798622	BLVRA	NM_000712	5'UTR
cg00168634	4	154572830
cg00168785	2	160142643	WDSUB1;WDSUB1;WDSUB1	NM_001128212;NM_001128213;NM_152528	5'UTR;5'UTR;5'UTR
cg00173098	20	1445335	NSFL1C;NSFL1C;NSFL1C	NM_182483;NM_016143;NM_018839	5'UTR;Body;Body
cg00173787	1	156698861	C1orf66;C1orf66;ISG20L2;C1orf66;C1orf66	NM_001142560;NM_001142560;NM_030980;NM_015997;NM_015997	1stExon;5'UTR;TSS1500;1stExon;5'UTR
cg00174851	7	134142981	AKR1B1	NM_001628	Body
cg00175838	6	31695027	DDAH2	NM_013974	Body
cg00176718	6	28781594
cg00178149	3	39093426	WDR48	NM_020839	TSS200
cg00178427	1	42500551
cg00178661	1	117208338	IGSF3;IGSF3	NM_001007237;NM_001542	Body;Body
cg00178864	4	140201574	C4orf49	NM_032623	TSS200
cg00181432	3	194393818	LSG1	NM_018385	TSS1500
cg00183239	10	12164781	DHTKD1	NM_018706	3'UTR
cg00183647	3	59035993	C3orf67	NM_198463	TSS1500
cg00184893	17	8021705	ALOXE3;ALOXE3	NM_021628;NM_001165960	5'UTR;Body
cg00185103	19	44430886	ZNF45	NM_003425	TSS1500
cg00186207	2	134788575
cg00186529	6	170452864
cg00187535	19	7747028	TRAPPC5;TRAPPC5;TRAPPC5	NM_174894;NM_001042462;NM_001042461	5'UTR;5'UTR;5'UTR
cg00188055	6	32076079	TNXB	NM_019105	5'UTR
cg00188748	9	130564509	FPGS;FPGS	NM_001018078;NM_004957	TSS1500;TSS1500
cg00190206	2	176999353
cg00196407	17	959496	ABR;ABR;ABR	NM_021962;NM_001092;NM_001159746	Body;Body;Body
cg00197006	16	84616559	COTL1	NM_021149	Body
cg00197026	6	11537105	TMEM170B	NM_001100829	TSS1500
cg00199753	12	113519288	DTX1	NM_004416	Body
cg00201133	10	35740216	CCNY;CCNY	NM_145012;NM_181698	Body;5'UTR
cg00202403	17	41624089	ETV4;ETV4	NM_001986;NM_001079675	TSS1500;TSS1500
cg00202819	12	102134014	SYCP3	NM_153694	TSS1500
cg00204748	12	29376779	FAR2;FAR2	NM_018099;NM_018099	1stExon;5'UTR
cg00205703	3	184054901	FAM131A;FAM131A	NM_001171093;NM_144635	5'UTR;TSS1500
cg00207226	5	126407100	FLJ44606;FLJ44606	NM_001164478;NM_001164479	5'UTR;5'UTR
cg00210098	3	12883308	SNORA7A;RPL32;RPL32;RPL32	NR_002582;NM_001007074;NM_000994;NM_001007073	TSS1500;TSS1500;TSS1500;TSS1500
cg00211115	11	69257736
cg00211174	3	127332098	MCM2	NM_004526	Body
cg00213080	7	6204521	CYTH3	NM_004227	3'UTR
cg00214688	10	33201038	ITGB1;ITGB1;ITGB1;ITGB1;ITGB1;ITGB1	NM_033668;NM_133376;NM_002211;NM_033667;NM_033669;NM_033666	Body;Body;Body;Body;Body;Body
cg00215017	10	134818683
cg00215902	11	122198071
cg00216024	2	27069312
cg00218203	17	74223696	RNF157	NM_052916	Body
cg00218406	6	31431407	HCP5	NM_006674	3'UTR
cg00218770	20	60469025	CDH4	NM_001794	Body
cg00218945	22	43265579
cg00219921	2	87012810	CD8A;CD8A;CD8A;CD8A	NM_001145873;NM_171827;NM_001768;NR_027353	3'UTR;3'UTR;3'UTR;Body
cg00220335	5	1343783	CLPTM1L	NM_030782	Body
cg00220389	17	80455521
cg00221650	2	6819650
cg00221747	11	2152428	INS-IGF2;IGF2;IGF2;IGF2	NR_003512;NM_001007139;NM_000612;NM_001127598	Body;3'UTR;3'UTR;3'UTR
cg00221794	2	20776620
cg00226615	6	31853565	EHMT2;EHMT2	NM_006709;NM_025256	Body;Body
cg00228891	1	207818893	CR1L	NM_175710	Body
cg00230899	16	89766723	SPATA2L	NM_152339	Body
cg00231966	17	80377299	C17orf101;C17orf101;HEXDC	NM_024648;NM_175902;NM_173620	TSS1500;TSS1500;5'UTR
cg00234961	22	50246573	ZBED4	NM_014838	TSS1500
cg00235313	5	54749496	PPAP2A;PPAP2A	NM_176895;NM_003711	Body;Body
cg00237026	5	10065651
cg00239467	3	154042361	DHX36;DHX36	NM_001114397;NM_020865	TSS200;TSS200
cg00239563	4	81128029
cg00240598	5	76363946
cg00242998	20	32807971
cg00243166	7	155437171	RBM33	NM_053043	TSS200
cg00244920	3	129116393	RPL32P3;SNORA7B	NR_003111;NR_002992	Body;TSS1500
cg00247803	1	93101184	EVI5	NM_005665	Body
cg00248521	16	2232251	CASKIN1	NM_020764	Body
cg00250430	9	1051579	DMRT2;DMRT2;DMRT2	NM_001130865;NM_006557;NM_181872	5'UTR;5'UTR;5'UTR
cg00250743	10	123264130	FGFR2;FGFR2;FGFR2;FGFR2;FGFR2;FGFR2;FGFR2;FGFR2;FGFR2	NM_001144914;NM_001144915;NM_022970;NM_001144913;NM_001144916;NM_000141;NM_001144917;NM_001144919;NM_001144918	Body;Body;Body;Body;Body;Body;Body;Body;Body
cg00251610	5	158527817	EBF1	NM_024007	TSS1500
cg00253228	8	145025610	PLEC1;PLEC1;PLEC1;PLEC1	NM_000445;NM_201378;NM_201379;NM_201380	Body;Body;Body;TSS1500
cg00254771	1	11538304	PTCHD2	NM_020780	TSS1500
cg00255135	8	143090366
cg00255699	1	40307257	TRIT1	NM_017646	3'UTR
cg00256789	2	241083754
cg00257775	6	37904681	ZFAND3	NM_021943	Body
cg00258694	4	56815070	CEP135;CEP135	NM_025009;NM_025009	1stExon;5'UTR
cg00259472	5	159625590	FABP6;FABP6	NM_001130958;NM_001040442	5'UTR;TSS1500
cg00259518	2	43397515
cg00259834	3	16553499	RFTN1	NM_015150	5'UTR
cg00261252	4	79860706	PAQR3	NM_001040202	TSS200
cg00262776	12	14720726	PLBD1;PLBD1	NM_024829;NM_024829	1stExon;5'UTR
cg00267142	6	167104601	RPS6KA2	NM_001006932	Body
cg00268338	10	93169495	HECTD2;LOC100188947;HECTD2	NM_173497;NR_024467;NM_182765	TSS1500;Body;TSS1500
cg00268476	16	2740589	KCTD5	NM_018992	Body
cg00268500	2	64067540	UGP2;UGP2	NM_006759;NM_001001521	TSS1500;TSS1500
cg00269725	6	156983315
cg00270789	16	46919075	GPT2;GPT2	NM_133443;NM_001142466	Body;TSS200
cg00273737	9	90794482
cg00275449	3	195162127	ACAP2	NM_012287	Body
cg00275741	5	140261749	PCDHA7;PCDHA12;PCDHA6;PCDHA10;PCDHA4;PCDHA11;PCDHA8;PCDHA1;PCDHA2;PCDHA6;PCDHA1;PCDHA9;PCDHA5;PCDHA13;PCDHA3;PCDHA13;PCDHA10	NM_018910;NM_018903;NM_018909;NM_018901;NM_018907;NM_018902;NM_018911;NM_031411;NM_018905;NM_031849;NM_018900;NM_031857;NM_018908;NM_031865;NM_018906;NM_018904;NM_031860	Body;Body;Body;Body;Body;Body;Body;Body;Body;Body;Body;Body;Body;TSS200;Body;TSS200;Body
cg00277769	7	97922759	BAIAP2L1	NM_018842	3'UTR
cg00282249	13	37005566	CCNA1;CCNA1;CCNA1;CCNA1	NM_001111047;NM_003914;NM_001111045;NM_001111046	TSS1500;TSS1500;TSS1500;TSS1500
cg00282510	9	100611516
cg00283662	19	46178101	MIR642;GIPR	NR_030372;NM_000164	TSS200;Body
cg00286214	16	2771425	PRSS27	NM_031948	TSS1500
cg00287536	10	34925718	PARD3	NM_019619	Body
cg00288957	15	65203541	ANKDD1A	NM_182703	TSS1500
cg00290355	3	150996599	MED12L;P2RY14	NM_053002;NM_014879	Body;TSS1500
cg00293644	1	32674341	DCDC2B	NM_001099434	TSS1500
cg00293936	2	25391505	POMC;POMC;POMC;POMC	NM_000939;NM_001035256;NM_001035256;NM_000939	5'UTR;1stExon;5'UTR;1stExon
cg00295604	11	102139524
cg00296348	10	134721479
cg00296501	1	115300863	CSDE1;CSDE1;CSDE1	NM_001130523;NM_007158;NM_001007553	TSS200;TSS1500;TSS1500
cg00297876	19	50861774	NAPSA	NM_004851	3'UTR
cg00300794	16	1231723	CACNA1H;CACNA1H	NM_021098;NM_001005407	Body;Body
cg00301396	16	30572929
cg00303335	7	101385620
cg00308503	5	160171384	ATP10B	NM_025153	5'UTR
cg00308909	10	130062280
cg00308914	5	17436715
cg00308936	1	85883665	DDAH1;DDAH1	NM_012137;NM_001134445	Body;5'UTR
cg00309106	6	31865663	EHMT2;EHMT2	NM_025256;NM_006709	TSS200;TSS200
cg00309945	1	22148926	LDLRAD2;HSPG2	NM_001013693;NM_005529	3'UTR;3'UTR
cg00310139	6	168225685	C6orf124	NR_027906	Body
cg00310855	11	64879153	C11orf2;TM7SF2	NM_013265;NM_003273	3'UTR;TSS200
cg00313099	16	64479729
cg00314750	8	107281821	OXR1	NM_018002	TSS1500
cg00316759	15	71407484	CT62;CT62	NM_001102658;NM_001102658	5'UTR;1stExon
cg00317585	4	188156703
cg00317837	8	121048603	DEPDC6	NM_022783	Body
cg00320216	11	128450029	ETS1	NM_001143820	5'UTR
cg00321775	10	48416391	GDF2	NM_016204	1stExon
cg00322062	15	43032408
cg00323359	17	43025178	KIF18B	NM_001080443	TSS200
cg00323915	7	150264987	GIMAP4	NM_018326	5'UTR
cg00324725	16	56581212
cg00325917	1	169671116	SELL;SELL	NM_000655;NR_029467	Body;Body
cg00327263	2	120019111	STEAP3;STEAP3;STEAP3	NM_018234;NM_182915;NM_001008410	Body;Body;Body
cg00327437	1	64578227	ROR1;ROR1	NM_005012;NM_001083592	Body;Body
cg00328058	1	901062	PLEKHN1;KLHL17;PLEKHN1	NM_001160184;NM_198317;NM_032129	TSS1500;3'UTR;TSS1500
cg00328376	7	26902685	SKAP2	NM_003930	Body
cg00329411	5	55881858
cg00329447	8	145028170	PLEC1;PLEC1;PLEC1	NM_000445;NM_201378;NM_201379	Body;Body;TSS200
cg00330279	16	87584184
cg00334274	22	30474915
cg00336669	12	4479842	FGF23	NM_020638	Body
cg00337905	18	32869840	ZNF271;ZNF397OS;ZNF271;ZNF397OS	NR_024566;NM_001166012;NR_024565;NM_001112734	TSS1500;5'UTR;TSS1500;5'UTR
cg00338529	2	134948022
cg00339300	1	61508924
cg00340052	2	236812921	AGAP1;AGAP1	NM_014914;NM_001037131	Body;Body
cg00340349	9	130550240	CDK9	NM_001261	Body
cg00340847	16	88688744	ZC3H18	NM_144604	Body
cg00340919	5	94879974	TTC37	NM_014639	Body
cg00345314	8	67624394	SGK3	NM_001033578	TSS1500
cg00349982	17	780838	NXN	NM_022463	Body
cg00350247	22	29784694	AP1B1;AP1B1;AP1B1	NM_001166019;NM_145730;NM_001127	TSS200;TSS200;TSS200
cg00350503	19	13613614	CACNA1A;CACNA1A	NM_001127222;NM_001127221	Body;Body
cg00355158	17	73776003	H3F3B	NM_005324	TSS200
cg00356251	7	158051019	PTPRN2;PTPRN2;PTPRN2	NM_002847;NM_130842;NM_130843	Body;Body;Body
cg00356511	17	35716273	ACACA;ACACA;ACACA	NM_198839;NM_198836;NM_198834	5'UTR;TSS1500;Body
cg00357176	7	139257004	HIPK2;HIPK2	NM_022740;NM_001113239	3'UTR;3'UTR
cg00357971	20	61923848	COL20A1	NM_020882	TSS1500
cg00358880	1	197885105	LHX9;LHX9	NM_020204;NM_001014434	TSS1500;Body
cg00360794	15	41803850	LTK;LTK;LTK	NM_206961;NM_001135685;NM_002344	Body;Body;Body
cg00360798	7	140139524
cg00364051	6	33647861	ITPR3	NM_002224	Body
cg00364287	12	121570752	P2RX7;P2RX7	NM_002562;NM_002562	5'UTR;1stExon
cg00366413	12	7072696	MIR141;MIR200C	NR_029682;NR_029779	TSS1500;TSS200
cg00369990	3	69129751	UBA3;UBA3	NM_198195;NM_003968	TSS1500;TSS1500
cg00370589	2	113762280	IL1F6	NM_014440	TSS1500
cg00370815	19	20748646	ZNF737	NM_001159293	TSS200
cg00373436	3	111721343	TAGLN3;TAGLN3;TAGLN3	NM_001008272;NM_001008273;NM_013259	Body;Body;Body
cg00375430	20	32847116	ASIP	NM_001672	TSS1500
cg00375939	3	73159950
cg00376654	16	20360497	UMOD;UMOD	NM_003361;NM_001008389	Body;Body
cg00378218	17	1546841	SCARF1;SCARF1;SCARF1;SCARF1;SCARF1	NM_145352;NR_028075;NM_003693;NR_028076;NM_145350	Body;Body;Body;Body;Body
cg00378999	11	3246380
cg00379272	11	22306534
cg00380904	6	20468372	E2F3	NM_001949	Body
cg00384553	1	228266701
cg00384707	19	51128576	SYT3;SYT3;SYT3	NM_001160328;NM_032298;NM_001160329	Body;Body;Body
cg00386581	11	62446121	UBXN1	NM_015853	Body
cg00388871	20	62530407	DNAJC5	NM_025219	5'UTR
cg00390511	7	36701016	AOAH	NM_001637	Body
cg00390694	20	62700725	TCEA2;TCEA2	NM_003195;NM_198723	Body;Body
cg00390724	3	18484742
cg00391320	12	112127825	ACAD10;ACAD10	NM_025247;NM_001136538	5'UTR;5'UTR
cg00393376	7	26237954	HNRNPA2B1;HNRNPA2B1	NM_031243;NM_002137	Body;Body
cg00395140	19	3063728	AES;AES;AES	NM_198969;NM_198970;NM_001130	TSS1500;TSS1500;TSS1500
cg00396484	11	126414507	KIRREL3;KIRREL3	NM_001161707;NM_032531	Body;Body
cg00396520	2	70314546	PCBP1	NM_006196	TSS200
cg00399483	18	49868378	DCC	NM_005215	Body
cg00400104	7	130790359	FLJ43663;FLJ43663	NR_015431;NR_024153	Body;Body
cg00401091	20	50159536	NFATC2;NFATC2;NFATC2	NM_012340;NM_001136021;NM_173091	TSS1500;Body;TSS1500
cg00401678	19	14787227	EMR3	NM_032571	TSS1500
cg00401939	6	14397330
cg00403616	8	591688
cg00404861	12	131590393	GPR133	NM_198827	Body
cg00405699	5	100239919	ST8SIA4;ST8SIA4	NM_175052;NM_005668	TSS1500;TSS1500
cg00405939	19	4045108
cg00406022	6	31691696	C6orf25;C6orf25;C6orf25;C6orf25;C6orf25;C6orf25	NM_138274;NM_138273;NM_138275;NM_138272;NM_025260;NM_138277	Body;Body;Body;Body;Body;Body
cg00406023	11	120090023	OAF	NM_178507	Body
cg00406211	10	121077022	GRK5	NM_005308	Body
cg00406621	16	29466731	BOLA2;GIYD2;SULT1A4;GIYD1;BOLA2B;GIYD2;SULT1A3;GIYD1	NM_001031827;NM_178044;NM_001017389;NM_001014999;NM_001039182;NM_024044;NM_003166;NM_001015000	TSS1500;Body;TSS1500;Body;TSS1500;Body;TSS1500;Body
cg00407729	10	52751144	PRKG1	NM_001098512	1stExon
cg00407820	6	150182095	LRP11	NM_032832	Body
cg00409434	2	46414317	PRKCE	NM_005400	3'UTR
cg00409696	2	106646656
cg00410898	8	23712355	STC1	NM_003155	TSS200
cg00411011	22	20848478	KLHL22	NM_032775	5'UTR
cg00411595	9	136339349	SLC2A6;SLC2A6	NM_001145099;NM_017585	Body;Body
cg00413370	8	102380629	NACAP1	NR_002182	TSS1500
cg00415939	11	85772935	PICALM;PICALM	NM_001008660;NM_007166	Body;Body
cg00418927	16	70380649	DDX19A	NM_018332	TSS200
cg00419512	7	45953027	IGFBP3;IGFBP3	NM_001013398;NM_000598	3'UTR;3'UTR
cg00419564	1	153508860	S100A6	NM_014624	TSS200
cg00419711	10	1205595	NCRNA00200	NR_015376	TSS200
cg00420742	19	54313004	NLRP12;NLRP12	NM_144687;NM_033297	Body;TSS1500
cg00420997	8	29607076	C8orf75	NR_026765	TSS1500
cg00421089	17	10421635	MYH1	NM_005963	5'UTR
cg00423729	5	150826949	SLC36A1	NM_078483	TSS1500
cg00426486	16	86605100
cg00426963	9	86535755	KIF27	NM_017576	5'UTR
cg00427260	17	62401212	PECAM1	NM_000442	TSS200
cg00427296	17	8534932	MYH10	NM_005964	TSS1500
cg00428636	8	18589742	PSD3;PSD3	NM_206909;NM_015310	Body;Body
cg00431324	16	30672051
cg00431968	8	92528313
cg00433917	19	7915517	EVI5L;EVI5L	NM_145245;NM_001159944	Body;Body
cg00434119	3	186080868	DGKG;DGKG;DGKG	NM_001346;NM_001080744;NM_001080745	TSS1500;TSS1500;TSS1500
cg00437102	2	10231846
cg00437239	6	28173238
cg00437395	15	99512799	LOC145814;LOC145814	NM_001102612;NM_001167902	Body;Body
cg00438026	6	31513267	ATP6V1G2;NFKBIL1;NFKBIL1;ATP6V1G2	NM_130463;NM_001144962;NM_001144963;NM_138282	Body;TSS1500;TSS1500;Body
cg00440980	17	74639894	ST6GALNAC1	NM_018414	TSS200
cg00442112	4	5021113	CYTL1	NM_018659	1stExon
cg00443946	16	86370962	LOC732275	NR_024406	Body
cg00443971	4	174451398	HAND2;NBLA00301	NM_021973;NR_003679	TSS200;TSS1500
cg00445523	3	50560456
cg00446065	7	2154175	MAD1L1;MAD1L1;MAD1L1	NM_003550;NM_001013837;NM_001013836	Body;Body;Body
cg00446472	16	89042082	CBFA2T3	NM_005187	Body
cg00447018	14	106938320	LOC100133469	NR_027457	TSS200
cg00447110	19	51645522	SIGLEC7;SIGLEC7	NM_016543;NM_014385	TSS200;TSS200
cg00447632	1	935861	HES4;HES4	NM_001142467;NM_021170	TSS1500;TSS1500
cg00448891	10	134731784
cg00449482	19	56187915	EPN1;EPN1;EPN1	NM_001130071;NM_001130072;NM_013333	TSS200;5'UTR;5'UTR
cg00449608	2	105856709	GPR45	NM_007227	TSS1500
cg00449798	13	25322015
cg00449812	16	3137690
cg00449868	6	149770103	ZC3H12D	NM_207360	3'UTR
cg00453190	7	149460972
cg00453193	7	115851050	TES	NM_015641	Body
cg00453735	10	33321730
cg00454770	10	116286974	ABLIM1;ABLIM1;ABLIM1;ABLIM1	NM_001003408;NM_001003407;NM_006720;NM_002313	Body;Body;TSS1500;Body
cg00461022	5	16618052	FAM134B	NM_001034850	TSS1500
cg00465198	10	97807225	CCNJ;CCNJ;CCNJ	NM_001134375;NM_001134376;NM_019084	Body;Body;Body
cg00465319	3	123339568	MYLK;MYLK;MYLK;MYLK;MYLK;MYLK	NM_053032;NM_053028;NM_053025;NM_053027;NM_053031;NM_053026	TSS200;Body;Body;Body;TSS200;Body
cg00465476	15	45406486	DUOX2;DUOXA2	NM_014080;NM_207581	TSS200;TSS200
cg00465970	3	129024601
cg00466500	20	44829821	CDH22	NM_021248	Body
cg00469800	9	132584943	TOR1A	NM_000113	Body
cg00471141	8	19796299	LPL	NM_000237	TSS1500
cg00471190	16	3115809	IL32;IL32;IL32;IL32;IL32;IL32;IL32;IL32;IL32	NM_001012631;NM_001012636;NM_001012632;NM_001012636;NM_001012635;NM_001012633;NM_004221;NM_001012634;NM_001012718	5'UTR;1stExon;5'UTR;5'UTR;5'UTR;5'UTR;5'UTR;5'UTR;5'UTR
cg00474017	13	114074435
cg00474194	18	67955861	SOCS6	NM_004232	TSS1500
cg00476243	7	150023
cg00476580	1	150207583	ANP32E;ANP32E;ANP32E	NM_001136479;NM_001136478;NM_030920	TSS1500;Body;Body
cg00476882	12	55391872
cg00476986	6	33282156	TAPBP;TAPBP;TAPBP;TAPBP;TAPBP;TAPBP	NM_172209;NM_172208;NM_003190;NM_172208;NM_172209;NM_003190	5'UTR;1stExon;1stExon;5'UTR;1stExon;5'UTR
cg00477557	2	132229728
cg00478326	15	78978136
cg00478421	2	11515109
cg00480142	12	96046743
cg00481159	12	96353086	AMDHD1	NM_152435	Body
cg00481259	16	450837	DECR2	NM_020664	TSS1500
cg00482020	16	25026850	ARHGAP17;ARHGAP17	NM_018054;NM_001006634	TSS200;TSS200
cg00482232	6	28226203	NKAPL	NM_001007531	TSS1500
cg00484488	15	73076983	ADPGK;ADPGK;ADPGK	NM_031284;NR_023319;NR_023318	TSS1500;TSS1500;TSS1500
cg00485380	7	26240560	CBX3;CBX3;HNRNPA2B1;HNRNPA2B1	NM_016587;NM_007276;NM_002137;NM_031243	TSS1500;TSS1500;TSS200;TSS200
cg00488501	11	3187032	OSBPL5;OSBPL5;OSBPL5	NM_001144063;NM_020896;NM_145638	TSS1500;TSS1500;TSS1500
cg00490349	11	45740105
cg00491851	17	40760955	FAM134C;TUBG1;FAM134C	NR_026697;NM_001070;NM_178126	Body;TSS1500;Body
cg00493363	7	106619774
cg00495352	19	19304836	RFXANK;RFXANK;LOC729991-MEF2B;LOC729991;LOC729991-MEF2B;LOC729991;LOC729991-MEF2B	NM_003721;NM_134440;NM_005919;NM_001145783;NR_027308;NM_001145784;NR_027307	Body;Body;TSS1500;TSS1500;TSS1500;TSS1500;TSS1500
cg00496036	10	7221713	SFMBT2	NM_001029880	Body
cg00497232	4	6665905
cg00498305	10	119000236	SLC18A2	NM_003054	TSS1500
cg00498591	3	9904557
cg00498653	3	156806902
cg00499210	11	65190135	NEAT1	NR_028272	TSS200
cg00499524	2	122732669
cg00499707	20	34679665
cg00499822	10	44881551	CXCL12;CXCL12;CXCL12	NM_000609;NM_001033886;NM_199168	TSS1500;TSS1500;TSS1500
cg00500176	19	10396158	ICAM4;ICAM4;ICAM4;ICAM1	NM_001039132;NM_001544;NM_022377;NM_000201	TSS1500;TSS1500;TSS1500;3'UTR
cg00500359	11	3175625	OSBPL5;OSBPL5;OSBPL5	NM_020896;NM_001144063;NM_145638	5'UTR;5'UTR;5'UTR
cg00500626	1	5544470
cg00500729	21	46708178	POFUT2;POFUT2;LOC642852;POFUT2	NR_004858;NM_133635;NR_026943;NM_015227	TSS1500;TSS1500;Body;TSS1500
cg00500770	20	47012991
cg00501482	6	33153052	COL11A2;COL11A2;COL11A2	NM_080679;NM_080681;NM_080680	Body;Body;Body
cg00501765	1	172410217	C1orf105	NM_139240	Body
cg00502442	6	157801893	ZDHHC14;ZDHHC14	NM_153746;NM_024630	TSS1500;TSS1500
cg00503804	16	50581707	NKD1	NM_033119	TSS1500
cg00505318	3	69130918	UBA3;UBA3	NM_198195;NM_003968	TSS1500;TSS1500
cg00506935	15	89169262	AEN	NM_022767	5'UTR
cg00507727	7	8302191	ICA1;ICA1;ICA1	NM_004968;NM_001136020;NM_022307	TSS200;TSS1500;TSS1500
cg00509649	5	1103848	SLC12A7	NM_006598	Body
cg00510149	11	10674966	MRVI1;MRVI1;MRVI1;MRVI1	NM_001100163;NM_001098579;NM_130385;NM_001100167	5'UTR;TSS1500;5'UTR;5'UTR
cg00510447	16	3071608	TNFRSF12A	NM_016639	Body
cg00510598	16	55364229	IRX6	NM_024335	3'UTR
cg00510689	5	156594470	FAM71B	NM_130899	TSS1500
cg00513060	19	58111480	ZNF530	NM_020880	1stExon
cg00513981	7	5642784	FSCN1	NM_003088	Body
cg00515161	17	59940900	BRIP1	NM_032043	TSS200
cg00515593	22	18114774
cg00515982	5	180670930	GNB2L1;SNORD95	NM_006098;NR_002591	TSS200;TSS1500
cg00517407	13	53191541	HNRNPA1L2;HNRNPA1L2	NM_001011725;NM_001011724	TSS200;TSS200
cg00522276	8	67452722
cg00524900	5	118609965	TNFAIP8	NM_001077654	Body
cg00525964	5	10802174
cg00526163	1	171454351	BAT2L2	NM_015172	TSS1500
cg00527489	1	214360954
cg00528492	6	32408863	HLA-DRA	NM_019111	Body
cg00528616	16	75036318	ZNRF1	NM_032268	Body
cg00530939	1	51425360	FAF1	NM_007051	Body
cg00531054	1	175961559	RFWD2;RFWD2	NM_022457;NM_001001740	Body;Body
cg00531137	16	57643932
cg00532659	13	61212529
cg00532890	1	164528682	PBX1	NM_002585	TSS200
cg00533183	6	32810742	PSMB8;PSMB8	NM_004159;NM_148919	Body;Body
cg00533585	10	121214717	GRK5	NM_005308	3'UTR
cg00534655	5	139492727	PURA	NM_005859	TSS1500
cg00535027	4	8593933	CPZ;CPZ;CPZ	NM_001014448;NM_003652;NM_001014447	TSS1500;TSS1500;TSS1500
cg00535334	2	210840833	UNC80;UNC80	NM_032504;NM_182587	Body;Body
cg00536532	6	33561449	C6orf227	NR_027908	TSS1500
cg00537673	6	43141823	SRF	NM_003131	Body
cg00538642	19	2096903	C19orf36;C19orf36;C19orf36;C19orf36;MOBKL2A	NM_001031735;NM_001039846;NM_001039846;NM_001031735;NM_130807	5'UTR;1stExon;5'UTR;1stExon;TSS1500
cg00541638	16	9056115	USP7	NM_003470	Body
cg00543769	5	70749126
cg00544734	12	49582237	TUBA1A	NM_006009	Body
cg00546774	2	112811810	TMEM87B	NM_032824	TSS1500
cg00547445	10	95326291	GPR120	NM_181745	TSS200
cg00550498	19	12251208	ZNF20	NM_021143	TSS200
cg00551387	10	24874291	ARHGAP21	NM_020824	Body
cg00552087	8	3316893	CSMD1	NM_033225	Body
cg00552892	2	220035927	SLC23A3;SLC23A3;SLC23A3	NM_001144890;NM_001144889;NM_144712	TSS1500;TSS1500;TSS1500
cg00553967	8	998514
cg00555600	8	21986018	HR;HR	NM_005144;NM_018411	Body;Body
cg00558990	12	110905734	GPN3;GPN3;GPN3;C12orf24	NM_001164372;NM_001164373;NM_016301;NM_013300	Body;Body;Body;TSS1500
cg00559845	11	134213821	GLB1L2	NM_138342	Body
cg00559992	5	67581342	PIK3R1	NM_181523	Body
cg00562598	17	8311594
cg00562641	5	68789255	OCLN	NM_002538	5'UTR
cg00563061	17	79381734	BAHCC1	NM_001080519	Body
cg00563348	15	41184109
cg00564164	19	12444910	ZNF563	NM_145276	TSS1500
cg00564212	19	41098516	LTBP4	NM_003573	TSS1500
cg00564546	15	76496741	C15orf27	NM_152335	3'UTR
cg00565558	7	6120396
cg00567930	1	2250796
cg00569276	1	17446545	PADI2	NM_007365	TSS1500
cg00572504	2	86017927	ATOH8	NM_032827	3'UTR
cg00572739	10	18948122	ARL5B	NM_178815	TSS200
cg00574530	5	134872064	NEUROG1	NM_006161	TSS1500
cg00576259	1	78225345	USP33;USP33;USP33;USP33;USP33;USP33	NM_015017;NM_201626;NM_201624;NM_015017;NM_201626;NM_201624	5'UTR;1stExon;5'UTR;1stExon;5'UTR;1stExon
cg00576279	12	54427293	HOXC4;HOXC5;HOXC5	NM_014620;NR_003084;NM_018953	5'UTR;Body;1stExon
cg00577847	1	203490804
cg00578039	6	31691403	C6orf25;C6orf25;C6orf25;C6orf25;C6orf25;C6orf25	NM_138274;NM_138273;NM_138275;NM_138272;NM_025260;NM_138277	Body;Body;Body;Body;Body;Body
cg00579481	22	21271797	CRKL;CRKL	NM_005207;NM_005207	5'UTR;1stExon
cg00581154	1	3123695	PRDM16;PRDM16	NM_022114;NM_199454	Body;Body
cg00581764	6	158183853
cg00582316	2	175201430	SP9	NM_001145250	Body
cg00583492	11	66610708	RCE1;C11orf80;RCE1	NM_001032279;NM_024650;NM_005133	TSS200;3'UTR;TSS200
cg00584026	4	942342	TMEM175	NM_032326	Body
cg00585790	2	109204845	LIMS1;LIMS1	NM_004987;NM_004987	1stExon;5'UTR
cg00587834	3	51749959	GRM2;GRM2	NM_001130063;NM_000839	Body;Body
cg00589006	16	70415864	ST3GAL2	NM_006927	Body
cg00589161	20	58295996	PHACTR3;PHACTR3;PHACTR3	NM_183246;NM_183244;NM_080672	TSS1500;TSS1500;Body
cg00589791	5	30429329
cg00589895	3	172429056	NCEH1;NCEH1;NCEH1;NCEH1	NM_001146276;NM_001146277;NM_001146278;NM_020792	TSS200;TSS200;TSS200;TSS200
cg00590152	17	74003831	EVPL	NM_001988	Body
cg00593404	6	52377740	TRAM2	NM_012288	Body
cg00593773	18	77336201
cg00594016	16	19721831	C16orf88	NM_001012991	Body
cg00594167	5	131772039	C5orf56	NM_001013717	Body
cg00595898	13	52734432	NEK3;NEK3;NEK3;NEK3	NM_152720;NR_027415;NM_001146099;NM_002498	TSS1500;TSS1500;TSS1500;TSS1500
cg00597555	15	90177036	KIF7	NM_198525	Body
cg00597931	8	142179697	DENND3	NM_014957	Body
cg00598600	8	12610812	LONRF1	NM_152271	Body
cg00598612	11	430839	ANO9	NM_001012302	Body
cg00599530	6	170589809
cg00602295	16	81328089
cg00605777	2	97533635	SEMA4C	NM_017789	5'UTR
cg00606312	1	241695616	KMO	NM_003679	TSS200
cg00608540	5	180627973	TRIM7;TRIM7;TRIM7;TRIM7;TRIM7	NM_203297;NM_203293;NM_203294;NM_203295;NM_203296	TSS200;Body;5'UTR;5'UTR;5'UTR
cg00608548	19	40972521	SPTBN4;BLVRB	NM_020971;NM_000713	TSS1500;TSS1500
cg00610577	12	12008666	ETV6	NM_001987	Body
cg00611372	15	40421080
cg00612299	19	14584761	PTGER1	NM_000955	Body
cg00615241	19	839689	PRTN3	NM_002777	TSS1500
cg00618096	2	106253151
cg00619207	1	111743368	DENND2D	NM_024901	TSS200
cg00619628	6	151258451	MTHFD1L	NM_015440	Body
cg00619978	5	180046052	FLT4;FLT4	NM_002020;NM_182925	Body;Body
cg00621289	21	47855916	PCNT	NM_006031	Body
cg00621666	19	50837025
cg00621779	8	27487459
cg00622105	2	65594478	SPRED2;SPRED2	NM_001128210;NM_181784	TSS1500;Body
cg00622170	4	2944594	C4orf10;NOP14	NR_015453;NM_003703	Body;Body
cg00624332	10	103880351	LDB1	NM_001113407	TSS200
cg00625110	16	53741731	FTO	NM_001080432	Body
cg00629563	5	118604943	TNFAIP8	NM_001077654	Body
cg00630237	15	91433507	FES;FES;FES;FES	NM_001143784;NM_001143783;NM_001143785;NM_002005	Body;Body;Body;Body
cg00630249	1	110036889	CYB561D1;CYB561D1;CYB561D1;CYB561D1;CYB561D1	NM_001134403;NM_001134402;NM_001134400;NM_182580;NM_001134404	1stExon;Body;1stExon;1stExon;1stExon
cg00630431	17	65735288	SNORA38B;NOL11	NR_003706;NM_015462	TSS1500;Body
cg00631221	6	139307985	REPS1;REPS1	NM_001128617;NM_031922	Body;Body
cg00631327	8	3965218	CSMD1	NM_033225	Body
cg00631702	6	45345615	RUNX2;RUNX2;SUPT3H;SUPT3H;SUPT3H	NM_001015051;NM_001024630;NM_181356;NM_181356;NM_003599	Body;Body;5'UTR;1stExon;TSS200
cg00634714	17	74497851	RHBDF2;RHBDF2	NM_001005498;NM_024599	TSS1500;TSS1500
cg00635674	15	72490448	GRAMD2	NM_001012642	TSS1500
cg00636527	5	176859356	GRK6;GRK6;GRK6	NM_001004106;NM_002082;NM_001004105	Body;Body;Body
cg00637104	20	1785303
cg00639200	17	41081377
cg00642209	20	35580258	SAMHD1	NM_015474	TSS200
cg00644814	1	6480929	HES2	NM_019089	TSS1500
cg00646216	16	73210822
cg00646244	5	37322183	NUP155;NUP155	NM_153485;NM_004298	Body;Body
cg00648005	1	9086914	SLC2A7	NM_207420	TSS1500
cg00648184	17	60828157	MARCH10;MARCH10	NM_001100875;NM_152598	Body;Body
cg00648558	1	35220224	GJB5	NM_005268	TSS1500
cg00649500	14	54862622	CDKN3;CDKN3	NM_005192;NM_001130851	TSS1500;TSS1500
cg00656475	17	79650824	HGS;ARL16	NM_004712;NM_001040025	TSS200;1stExon
cg00657780	16	50285254
cg00658427	14	102431823	DYNC1H1	NM_001376	Body
cg00659559	7	29961120	SCRN1;SCRN1;SCRN1;SCRN1	NM_001145514;NM_001145515;NM_001145513;NM_014766	3'UTR;3'UTR;3'UTR;3'UTR
cg00660167	17	80200974
cg00660232	21	45114601	RRP1B	NM_015056	3'UTR
cg00660989	14	45432516	KLHL28;FAM179B	NM_017658;NM_015091	TSS1500;1stExon
cg00661777	7	106511741	PIK3CG	NM_002649	Body
cg00662646	12	57920715	MBD6	NM_052897	Body
cg00665029	8	354520
cg00665106	1	201515370
cg00666623	8	105375683
cg00667360	16	30076044	ALDOA;ALDOA;ALDOA;ALDOA;ALDOA	NM_184043;NM_001127617;NM_001127617;NM_184041;NM_000034	5'UTR;1stExon;5'UTR;TSS1500;5'UTR
cg00668519	3	11597941	VGLL4;ATG7;VGLL4;ATG7;VGLL4;ATG7;VGLL4	NM_014667;NM_001144912;NM_001128220;NM_001136031;NM_001128219;NM_006395;NM_001128221	3'UTR;3'UTR;3'UTR;3'UTR;3'UTR;3'UTR;3'UTR
cg00670721	3	186504202	SNORA63;MIR1248;EIF4A2;SNORA81;SNORA4	NR_002586;NR_031650;NM_001967;NR_002989;NR_002588	TSS1500;TSS1500;Body;TSS1500;TSS1500
cg00673674	19	19144826	SFRS14;ARMC6;SFRS14	NM_014884;NM_033415;NM_001017392	TSS1500;5'UTR;TSS1500
cg00675160	16	1208531	CACNA1H;CACNA1H	NM_021098;NM_001005407	Body;Body
cg00675600	5	1255458	TERT;TERT	NM_198255;NM_198253	Body;Body
cg00675650	3	172429335	NCEH1;NCEH1;NCEH1;NCEH1	NM_020792;NM_001146278;NM_001146277;NM_001146276	TSS1500;TSS1500;TSS1500;TSS1500
cg00676801	2	191876673	STAT1;STAT1	NM_139266;NM_007315	5'UTR;5'UTR
cg00677236	2	64068971	UGP2;UGP2	NM_006759;NM_001001521	TSS200;5'UTR
cg00677455	12	58241039	CTDSP2	NM_005730	TSS1500
cg00679520	12	63133578	PPM1H	NM_020700	Body
cg00682090	17	3733468	C17orf85;C17orf85	NM_018553;NM_001114118	5'UTR;Body
cg00682367	20	48963280
cg00685014	11	62212195	AHNAK	NM_024060	Body
cg00685984	17	66451565	WIPI1	NM_017983	Body
cg00687252	6	30712060	IER3	NM_003897	Body
cg00687447	16	1158657
cg00687674	15	69373260	MIR548H4;TMEM84	NR_031680;NR_026949	Body;Body
cg00689225	14	35871954	NFKBIA	NM_020529	Body
cg00690143	7	30810858	FAM188B	NM_032222	TSS200
cg00690968	6	41437676
cg00693978	1	146556675
cg00696158	6	37190552	TMEM217;TMEM217	NM_145316;NM_001162900	5'UTR;5'UTR
cg00697301	12	19936477
cg00700039	18	2659555	SMCHD1	NM_015295	Body
cg00700596	6	47277029	TNFRSF21	NM_014452	Body
cg00701530	6	31803074	C6orf48;SNORD48;C6orf48	NM_001040437;NR_002745;NM_001040438	5'UTR;Body;5'UTR
cg00703822	4	10145483
cg00704780	2	242207920	HDLBP;HDLBP	NM_203346;NM_005336	5'UTR;5'UTR
cg00705805	7	23568829	TRA2A	NM_013293	Body
cg00708789	4	16083440	PROM1;PROM1	NM_001145848;NM_001145847	5'UTR;5'UTR
cg00711072	17	46669489	LOC404266;HOXB5;LOC404266;LOC404266;LOC404266	NR_033204;NM_002147;NR_033201;NR_033203;NR_033202	TSS200;3'UTR;Body;TSS200;Body
cg00711386	2	73400723
cg00711596	19	2115281	AP3D1;AP3D1	NM_001077523;NM_003938	Body;Body
cg00712935	16	88443063
cg00713294	1	55678649	USP24	NM_015306	Body
cg00713925	1	156265511	C1orf85	NM_144580	TSS200
cg00714078	2	135809744	RAB3GAP1	NM_012233	TSS200
cg00714888	1	17287670	CROCC	NM_014675	Body
cg00715047	17	73522054	LLGL2;LLGL2;LLGL2	NM_001015002;NM_004524;NM_001031803	5'UTR;5'UTR;5'UTR
cg00715122	8	59904538	TOX	NM_014729	Body
cg00716787	2	131100118	IMP4;CCDC115	NM_033416;NM_032357	TSS1500;TSS200
cg00717080	21	44483604	CBS	NM_000071	Body
cg00717734	2	238472036
cg00718400	3	32509018
cg00718684	6	31692026	C6orf25;C6orf25;C6orf25;C6orf25;C6orf25;C6orf25	NM_138274;NM_138273;NM_138275;NM_138272;NM_025260;NM_138277	Body;Body;Body;Body;Body;Body
cg00719568	1	113239645	MOV10;MOV10	NM_020963;NM_001130079	Body;Body
cg00719771	6	23523214
cg00720829	6	30131219	TRIM15;TRIM15	NM_033229;NM_033229	5'UTR;1stExon
cg00725185	14	24599525	FITM1	NM_203402	TSS1500
cg00725654	7	43314146	HECW1	NM_015052	Body
cg00729564	8	1857241	ARHGEF10	NM_014629	Body
cg00729654	20	31123895
cg00731958	7	48081031	C7orf57	NM_001100159	Body
cg00733150	22	45705707	FAM118A;FAM118A	NM_001104595;NM_017911	5'UTR;TSS200
cg00733683	19	1244464	ATP5D;ATP5D	NM_001687;NM_001001975	3'UTR;3'UTR
cg00735591	19	10828665	DNM2;DNM2;DNM2;DNM2;MIR638	NM_004945;NM_001005362;NM_001005360;NM_001005361;NR_030368	TSS200;TSS200;TSS200;TSS200;TSS1500
cg00737593	1	43422337	SLC2A1	NM_006516	Body
cg00737801	16	1516140	CLCN7;CLCN7	NM_001287;NM_001114331	Body;Body
cg00739120	19	36035875	GAPDHS;TMEM147	NM_014364;NM_032635	Body;TSS1500
cg00740088	18	19745316
cg00741731	19	42348676	LYPD4;DMRTC2	NM_173506;NM_001040283	TSS200;TSS1500
cg00742040	6	36566732	SFRS3	NM_003017	Body
cg00742603	16	90086301	DBNDD1	NM_001042610	TSS1500
cg00744524	6	44239416	TMEM151B	NM_001137560	Body
cg00747372	2	102398839	MAP4K4;MAP4K4;MAP4K4	NM_145687;NM_004834;NM_145686	Body;Body;Body
cg00747890	14	90854534
cg00749852	17	47841577	FAM117A	NM_030802	TSS200
cg00750555	16	22204290
cg00750880	17	75681168
cg00751633	16	1179689
cg00753924	9	137298813	RXRA	NM_002957	Body
cg00754604	2	161230046	RBMS1;RBMS1	NM_002897;NM_016836	Body;Body
cg00755064	7	23749991	STK31;STK31;STK31	NM_001122833;NM_031414;NM_032944	5'UTR;Body;TSS200
cg00755950	2	69910490
cg00757207	17	7456223	TNFSF12;TNFSF12-TNFSF13	NM_003809;NM_172089	Body;Body
cg00758797	15	91424646	FURIN	NM_002569	Body
cg00760536	22	21025571
cg00761755	17	1531579	SLC43A2	NM_152346	5'UTR
cg00762550	17	33306307	LIG3;LIG3	NM_002311;NM_013975	TSS1500;TSS1500
cg00762662	10	23727572	OTUD1	NM_001145373	TSS1500
cg00763244	2	130590740
cg00765128	6	28226905	NKAPL	NM_001007531	TSS200
cg00766729	19	56136136	ZNF784	NM_203374	TSS200
cg00770372	8	37237473
cg00771084	2	242598843	ATG4B;ATG4B	NM_013325;NM_178326	Body;Body
cg00773810	7	92217778	FAM133B;FAM133B	NM_152789;NM_001040057	Body;5'UTR
cg00774457	2	58479214
cg00774999	8	145115907	OPLAH	NM_017570	TSS1500
cg00775075	16	11891054
cg00776405	8	133967862	TG	NM_003235	Body
cg00776464	1	162039314	NOS1AP;NOS1AP	NM_014697;NM_001164757	TSS1500;TSS1500
cg00781540	3	50396681	TMEM115;TMEM115	NM_007024;NM_007024	5'UTR;1stExon
cg00782200	2	145280523
cg00782275	20	32579442
cg00783363	7	5644160	FSCN1	NM_003088	Body
cg00784161	2	238406432	MLPH;MLPH	NM_001042467;NM_024101	Body;Body
cg00785193	2	36582293	CRIM1	NM_016441	TSS1500
cg00785482	1	208058986
cg00787305	9	139378815	C9orf163;SEC16A;C9orf163	NM_152571;NM_014866;NM_152571	5'UTR;TSS1500;1stExon
cg00788760	22	44682494	KIAA1644	NM_001099294	Body
cg00791854	1	154392070	IL6R;IL6R	NM_181359;NM_000565	Body;Body
cg00792123	2	20850523	HS1BP3	NM_022460	Body
cg00792938	1	26758637	DHDDS;DHDDS	NM_024887;NM_205861	TSS200;TSS200
cg00792968	13	22635873
cg00793181	12	52995634	KRT72;KRT72;KRT72	NM_080747;NM_001146225;NM_001146226	TSS1500;TSS1500;TSS1500
cg00793946	2	46163986	PRKCE	NM_005400	Body
cg00794178	3	182897283	MCF2L2	NM_015078	Body
cg00794911	6	166260532
cg00795791	7	135346062	PL-5283	NM_001130929	TSS1500
cg00795812	2	242802009	PDCD1	NM_005018	TSS1500
cg00796364	16	89753572	CDK10;CDK10;CDK10;CDK10;CDK10;CDK10	NM_001098533;NR_027702;NR_027703;NM_001160367;NM_052988;NM_052987	5'UTR;Body;Body;5'UTR;Body;5'UTR
cg00796963	6	84936558	KIAA1009	NM_014895	5'UTR
cg00803580	16	85540297
cg00804354	1	249111407	SH3BP5L	NM_030645	Body
cg00805360	10	135091210	ADAM8;ADAM8;ADAM8	NM_001109;NM_001164489;NM_001164490	TSS1500;TSS1500;TSS1500
cg00805441	22	23915440	IGLL1;IGLL1	NM_152855;NM_020070	3'UTR;3'UTR
cg00805874	6	31867847	ZBTB12	NM_181842	Body
cg00806959	1	44219988	ST3GAL3;ST3GAL3;ST3GAL3;ST3GAL3;ST3GAL3;ST3GAL3;ST3GAL3;ST3GAL3;ST3GAL3;ST3GAL3	NM_174968;NM_006279;NM_174971;NM_174963;NM_174967;NM_174969;NM_174970;NM_174964;NM_174965;NM_174966	Body;Body;Body;Body;Body;Body;Body;Body;Body;Body
cg00808175	12	6949119	GNB3	NM_002075	TSS1500
cg00808492	1	120354159	REG4;REG4;REG4;REG4;REG4;REG4	NM_001159352;NM_001159353;NM_032044;NM_001159352;NM_001159353;NM_032044	5'UTR;5'UTR;1stExon;1stExon;1stExon;5'UTR
cg00810208	4	997012	IDUA	NM_000203	Body
cg00810483	4	3375144	RGS12;RGS12;RGS12	NM_198229;NM_198227;NM_002926	Body;Body;Body
cg00810914	19	42879857	MEGF8	NM_001410	Body
cg00811796	7	129073727	FAM40B;FAM40B	NM_020704;NM_001134336	TSS1500;TSS1500
cg00812761	4	53799391	SCFD2	NM_152540	Body
cg00814780	14	95331232
cg00815583	8	28348123	FBXO16	NM_172366	TSS1500
cg00816080	16	49518084
cg00816177	16	57770390	KATNB1	NM_005886	5'UTR
cg00816936	1	68631105	GPR177;GPR177	NM_001002292;NM_024911	Body;Body
cg00819078	5	16615081	FAM134B	NM_001034850	Body
cg00820535	22	39852281	MGAT3	NM_002409	TSS1500
cg00820581	1	174969299	CACYBP;CACYBP;CACYBP	NM_014412;NM_001007214;NM_014412	5'UTR;5'UTR;1stExon
cg00820919	2	43863839	PLEKHH2	NM_172069	TSS1500
cg00828556	3	196351986
cg00829041	2	218619744	DIRC3	NR_026597	Body
cg00829845	16	26657174
cg00829978	7	92669859
cg00830435	1	2918526
cg00830755	17	80819020	TBCD	NM_005993	Body
cg00830767	16	19098198
cg00832457	12	32287236	BICD1;BICD1	NM_001714;NM_001003398	Body;Body
cg00832635	19	22815853	ZNF492	NM_020855	TSS1500
cg00832703	3	183254601	KLHL6	NM_130446	Body
cg00834923	16	85393998
cg00835857	8	145086659	SPATC1;SPATC1;SPATC1;SPATC1	NM_001134374;NM_198572;NM_198572;NM_001134374	1stExon;5'UTR;1stExon;5'UTR
cg00836964	5	139137277
cg00837218	14	21865939	CHD8;SNORD8;CHD8	NM_020920;NR_002916;NM_001170629	Body;TSS1500;Body
cg00838399	19	56154867	ZNF581	NM_016535	TSS200
cg00841985	3	15901302	ANKRD28	NM_015199	TSS1500
cg00842918	17	9940321	GAS7;GAS7	NM_201432;NM_201433	TSS1500;Body
cg00847301	16	14924630
cg00849025	11	58170461	OR5B3	NM_001005469	1stExon
cg00849368	5	94890411	ARSK;TTC37	NM_198150;NM_014639	TSS1500;5'UTR
cg00850505	6	166580460	T	NM_003181	Body
cg00851261	19	1526651	PLK5P	NR_026557	Body
cg00851303	16	31881243
cg00852846	2	85664713
cg00852921	20	62120544	EEF1A2	NM_001958	Body
cg00855901	1	79085765	IFI44L	NM_006820	TSS1500
cg00856775	16	88504211	ZNF469	NM_001127464	Body
cg00857921	1	92257380	TGFBR3	NM_003243	Body
cg00858483	12	123238275	DENR	NM_003677	Body
cg00859858	1	37944257	ZC3H12A	NM_025079	Body
cg00860321	7	1889727	MAD1L1;MAD1L1;MAD1L1	NM_003550;NM_001013837;NM_001013836	Body;Body;Body
cg00861411	19	2115611	AP3D1;AP3D1	NM_001077523;NM_003938	Body;Body
cg00862597	14	61750802
cg00863094	3	196727354
cg00863309	1	212226308	DTL	NM_016448	Body
cg00864012	17	62294665	TEX2	NM_018469	5'UTR
cg00864384	2	69871130	AAK1	NM_014911	TSS200
cg00864768	19	54692102	MBOAT7;MBOAT7;MBOAT7;MBOAT7	NM_001146083;NM_001146082;NM_001146056;NM_024298	Body;Body;Body;Body
cg00864945	1	247291374
cg00864954	16	70587308	SF3B3	NM_012426	Body
cg00866295	1	203660476	ATP2B4;ATP2B4	NM_001001396;NM_001684	Body;Body
cg00870778	7	97598492	MGC72080	NR_002822	Body
cg00874691	4	77867684
cg00874877	6	32272050	C6orf10	NM_006781	Body
cg00876142	6	169247803
cg00876266	19	5915133	CAPS;CAPS	NM_080590;NM_004058	Body;Body
cg00876272	14	103265614	TRAF3;TRAF3;TRAF3	NM_145726;NM_003300;NM_145725	5'UTR;5'UTR;5'UTR
cg00877329	10	100996579	HPSE2;HPSE2;HPSE2;HPSE2	NM_001166244;NM_001166246;NM_021828;NM_001166245	TSS1500;TSS1500;TSS1500;TSS1500
cg00879447	2	56412077	CCDC85A	NM_001080433	Body
cg00879824	6	44747344
cg00881378	15	101623617
cg00884805	1	68296607	GNG12	NM_018841	5'UTR
cg00885606	18	56932993
cg00886770	13	52770931
cg00887295	13	29009876	FLT1;FLT1;FLT1;FLT1	NM_001159920;NM_001160030;NM_002019;NM_001160031	Body;Body;Body;Body
cg00891011	1	150487740
cg00892255	14	51243177	NIN;NIN;NIN;NIN	NM_182946;NM_016350;NM_020921;NM_182944	Body;Body;Body;Body
cg00892353	8	124247948	C8orf76	NM_032847	Body
cg00894008	15	34158294	RYR3	NM_001036	3'UTR
cg00894435	15	91642967	SV2B;SV2B	NM_014848;NM_001167580	TSS1500;TSS1500
cg00894440	12	125348579	SCARB1;SCARB1	NM_005505;NM_001082959	TSS200;TSS200
cg00896284	6	164758333
cg00898807	14	23415615	HAUS4;HAUS4;HAUS4	NM_001166269;NM_001166270;NM_017815	3'UTR;3'UTR;3'UTR
cg00898920	2	241504756
cg00899659	10	45495971	C10orf25;ZNF22	NM_001039380;NM_006963	Body;TSS1500
cg00901675	13	30728236
cg00902147	17	76993394	CANT1;CANT1;CANT1	NM_138793;NM_001159773;NM_001159772	Body;Body;Body
cg00902417	17	15492168	CDRT1	NM_006382	3'UTR
cg00902741	19	48964062	KCNJ14;KCNJ14	NM_013348;NM_170720	5'UTR;TSS1500
cg00902815	13	76313846	LMO7	NM_005358	Body
cg00903308	7	27177068
cg00903998	1	216897293	ESRRG;ESRRG;ESRRG;ESRRG;ESRRG	NM_206594;NM_001438;NR_024099;NM_206595;NM_001134285	5'UTR;TSS1500;TSS1500;5'UTR;5'UTR
cg00904580	17	74113667
cg00905419	1	2839179
cg00906147	4	39979791	PDS5A;PDS5A;PDS5A	NM_001100400;NM_001100399;NM_015200	TSS1500;TSS1500;TSS1500
cg00907200	2	239037422	ESPNL	NM_194312	Body
cg00907473	1	90459283	ZNF326;LOC492303;ZNF326	NM_182975;NR_002830;NM_182976	TSS1500;Body;TSS1500
cg00908042	22	43059020
cg00908584	7	155024775
cg00909806	1	212688762
cg00910338	14	101423117	SNORD114-6	NR_003198	TSS1500
cg00916255	1	170634931	PRRX1;PRRX1	NM_022716;NM_006902	Body;Body
cg00916454	4	156877765
cg00916854	12	123350361	VPS37B	NM_024667	3'UTR
cg00917003	7	150716366	ATG9B	NM_173681	Body
cg00917031	9	123477533	MEGF9	NM_001080497	TSS1500
cg00917154	18	77559235
cg00919702	10	16561351	C1QL3	NM_001010908	Body
cg00921237	22	49496760
cg00924004	8	65490710	LOC401463	NR_015374	TSS1500
cg00926192	17	42297085	UBTF;UBTF;UBTF	NM_001076684;NM_014233;NM_001076683	TSS200;TSS1500;5'UTR
cg00927226	7	115608801	TFEC;TFEC	NM_012252;NM_001018058	Body;Body
cg00928580	8	27473612	CLU	NM_001831	TSS1500
cg00929050	14	50359216	ARF6	NM_001663	TSS1500
cg00929336	16	81437496
cg00931491	16	28608288	SULT1A2;SULT1A2	NM_001054;NM_177528	5'UTR;TSS1500
cg00932156	14	69618982	DCAF5	NM_003861	Body
cg00932808	6	14211322
cg00934037	1	100889672	CDC14A;CDC14A;CDC14A	NM_003672;NM_033312;NM_033313	Body;Body;Body
cg00934087	2	27614310	PPM1G;PPM1G	NM_002707;NM_177983	Body;Body
cg00935108	16	129562	MPG;MPG;MPG	NM_001015054;NM_002434;NM_001015052	Body;Body;Body
cg00935421	16	87991419	BANP;BANP	NM_017869;NM_079837	5'UTR;5'UTR
cg00935653	7	25897725
cg00935895	2	152117022	RBM43	NM_198557	Body
cg00936790	8	29027844	KIF13B	NM_015254	Body
cg00937359	6	86350540	SYNCRIP;SYNCRIP;SYNCRIP;SYNCRIP;SYNCRIP;SYNCRIP	NM_001159675;NM_006372;NM_001159674;NM_001159677;NM_001159676;NM_001159673	Body;Body;Body;Body;Body;5'UTR
cg00940577	17	28803884	GOSR1;GOSR1;GOSR1	NM_004871;NM_001007024;NM_001007025	TSS1500;TSS1500;TSS1500
cg00941836	22	27834549
cg00942241	16	945615	LMF1	NM_022773	Body
cg00942495	15	76214616	FBXO22;FBXO22	NM_012170;NM_147188	Body;Body
cg00943060	7	65211784
cg00944712	6	24360156
cg00946316	7	157552159	PTPRN2;PTPRN2;PTPRN2	NM_002847;NM_130842;NM_130843	Body;Body;Body
cg00946921	14	106025021
cg00947023	17	11953402	MAP2K4	NM_003010	Body
cg00952054	1	9437047
cg00953443	8	141577413	EIF2C2;EIF2C2	NM_012154;NM_001164623	Body;Body
cg00954105	17	63739259	CCDC46;CCDC46	NM_001037325;NM_145036	Body;Body
cg00956252	16	11249856	CLEC16A	NM_015226	Body
cg00958304	8	17781171	PCM1	NM_006197	5'UTR
cg00960772	12	133127270	FBRSL1	NM_001142641	Body
cg00964063	14	51134117	SAV1	NM_021818	Body
cg00965795	2	27957843
cg00966890	21	33031758	SOD1	NM_000454	TSS200
cg00967073	1	244443687
cg00967854	1	17750646	RCC2;RCC2	NM_018715;NM_001136204	Body;Body
cg00969787	1	45956256	TESK2	NM_007170	5'UTR
cg00969893	15	63133069	TLN2	NM_015059	3'UTR
cg00970057	1	42272694	HIVEP3;HIVEP3	NM_024503;NM_001127714	5'UTR;5'UTR
cg00971050	17	40573764	PTRF	NM_012232	Body
cg00971110	7	84814140
cg00974255	17	35082656
cg00976381	5	138713954	SLC23A1;SLC23A1	NM_152685;NM_005847	Body;Body
cg00982680	2	44588811	PREPL;PREPL;C2orf34;PREPL;PREPL;PREPL;PREPL;PREPL	NM_001171617;NM_001171617;NM_024766;NM_001171603;NM_001171613;NM_001171603;NM_001171606;NM_006036	1stExon;5'UTR;TSS1500;5'UTR;TSS200;1stExon;TSS200;TSS1500
cg00982919	9	126775263	LHX2	NM_004789	Body
cg00984715	22	46551260	PPARA;PPARA	NM_001001928;NM_005036	5'UTR;5'UTR
cg00987031	5	140893101
cg00987278	6	90529715	MDN1	NM_014611	TSS1500
cg00987513	1	145413337	HFE2;HFE2;HFE2;HFE2;HFE2;HFE2;HFE2;HFE2	NM_202004;NM_202004;NM_213653;NM_145277;NM_213652;NM_213652;NM_145277;NM_213653	1stExon;5'UTR;5'UTR;1stExon;1stExon;5'UTR;5'UTR;1stExon
cg00988056	14	106374554
cg00990740	21	39871287	ERG;ERG;ERG;ERG	NM_004449;NM_182918;NM_001136155;NM_001136154	Body;TSS1500;TSS1500;Body
cg00992039	19	45903658	PPP1R13L;PPP1R13L	NM_001142502;NM_006663	5'UTR;5'UTR
cg00992297	5	141061943	ARAP3	NM_022481	TSS200
cg00994306	16	1295608
cg00994649	8	86131385	C8orf59;C8orf59;C8orf59;C8orf59	NM_001099673;NM_001099670;NM_001099672;NM_001099671	5'UTR;5'UTR;5'UTR;5'UTR
cg00994936	19	1423902	DAZAP1;DAZAP1	NM_018959;NM_170711	Body;Body
cg00995085	3	184375369
cg00997400	20	60502131	CDH4	NM_001794	Body
cg00997655	5	125929132	ALDH7A1	NM_001182	Body
cg00998372	2	105483497
cg01000188	9	133769184	QRFP	NM_198180	1stExon
cg01001049	16	8995730	USP7	NM_003470	Body
cg01001286	15	81475638
cg01002030	1	65211677	RAVER2	NM_018211	Body
cg01002208	2	134576855
cg01002223	1	8987034
cg01005303	1	11985115	KIAA2013	NM_138346	Body
cg01006126	16	1146445	C1QTNF8	NM_207419	TSS1500
cg01008263	16	70605696	SF3B3	NM_012426	Body
cg01008941	4	39046077	KLHL5;KLHL5	NM_001171654;NM_001007075	TSS1500;TSS1500
cg01010211	22	17956453	CECR2	NM_031413	TSS200
cg01011432	20	60982814	CABLES2	NM_031215	TSS1500
cg01011748	2	154729200	GALNT13	NM_052917	5'UTR
cg01012295	8	2037717	MYOM2	NM_003970	Body
cg01014262	16	48533930
cg01015199	6	53409878	GCLC	NM_001498	TSS200
cg01015287	9	103360761
cg01015899	12	120663812	PXN;PXN;PXN	NM_025157;NM_001080855;NM_002859	5'UTR;Body;Body
cg01016090	20	18477958	RBBP9	NM_006606	TSS200
cg01018002	1	28844479	SNHG3-RCC1;RCC1;SNHG3-RCC1;RCC1;SNHG3-RCC1;RCC1	NR_030725;NM_001269;NR_030726;NM_001048195;NM_001048199;NM_001048194	Body;TSS1500;Body;TSS1500;5'UTR;TSS1500
cg01018128	2	175238687	CIR1	NM_004882	Body
cg01019333	7	30025851	SCRN1;SCRN1;SCRN1;SCRN1	NM_014766;NM_001145514;NM_001145513;NM_001145515	5'UTR;Body;5'UTR;5'UTR
cg01021053	10	58121007	ZWINT;ZWINT;ZWINT;ZWINT;ZWINT;ZWINT	NM_001005413;NM_001005413;NM_007057;NM_032997;NM_032997;NM_007057	5'UTR;1stExon;5'UTR;5'UTR;1stExon;1stExon
cg01022200	1	180881086	KIAA1614	NM_020950	TSS1500
cg01022219	18	13641735	C18orf1;C18orf1;C18orf1;C18orf1;C18orf1;C18orf1	NM_001003675;NM_181481;NM_181482;NM_004338;NM_001003674;NM_181483	Body;Body;Body;Body;Body;Body
cg01022567	7	129466001
cg01022780	3	48598236
cg01023787	5	1243714	SLC6A18	NM_182632	Body
cg01025883	16	23867088	PRKCB;PRKCB	NM_002738;NM_212535	Body;Body
cg01027229	7	86572891	KIAA1324L;KIAA1324L;KIAA1324L	NM_001142749;NR_030672;NM_152748	Body;Body;Body
cg01027929	7	26241406	HNRNPA2B1;CBX3;CBX3;HNRNPA2B1;CBX3	NM_031243;NM_016587;NM_007276;NM_002137;NM_016587	TSS1500;1stExon;5'UTR;TSS1500;5'UTR
cg01027976	22	42734612
cg01028389	16	87079265
cg01028522	2	69034419	ARHGAP25;ARHGAP25;ARHGAP25;ARHGAP25	NM_014882;NM_001007231;NM_001166276;NM_001166277	Body;Body;Body;Body
cg01029985	19	40932112	SERTAD1	NM_013376	TSS200
cg01031101	6	28227091	NKAPL	NM_001007531	TSS200
cg01033175	3	101396021	ZBTB11;LOC100009676	NM_014415;NR_024407	TSS200;Body
cg01035190	19	49560930
cg01040181	8	146278358	C8orf33	NM_023080	Body
cg01040585	17	36907054
cg01040649	3	186738320	ST6GAL1;ST6GAL1;ST6GAL1	NM_173216;NM_003032;NM_173217	5'UTR;TSS1500;5'UTR
cg01041367	8	74888080	TMEM70;TMEM70	NM_017866;NM_001040613	TSS1500;TSS1500
cg01044293	2	173296469	ITGA6;ITGA6	NM_001079818;NM_000210	Body;Body
cg01044731	13	24554006
cg01046961	4	190474558
cg01049849	1	10807676	CASZ1;CASZ1	NM_001079843;NM_017766	5'UTR;5'UTR
cg01051524	2	106415145	NCK2;NCK2	NM_003581;NM_001004722	5'UTR;5'UTR
cg01051581	5	32090639	PDZD2	NM_178140	Body
cg01052572	7	76719819
cg01053463	1	26186087	C1orf135	NM_024037	TSS1500
cg01055191	5	179234187	SQSTM1;SQSTM1;MGAT4B	NM_001142298;NM_001142299;NM_014275	5'UTR;5'UTR;TSS1500
cg01056568	17	9729258	GLP2R	NM_004246	TSS200
cg01057176	2	115200247	DPP10;DPP10	NM_020868;NM_020868	1stExon;5'UTR
cg01057573	5	118683890	TNFAIP8	NM_001077654	Body
cg01059913	12	120033155	TMEM233	NM_001136534	Body
cg01060165	19	50321417	MED25	NM_030973	TSS200
cg01060952	17	48424106	XYLT2	NM_022167	Body
cg01063280	6	108167599
cg01063413	5	32177881
cg01063579	16	86715152
cg01065373	17	41476044	ARL4D	NM_001661	TSS1500
cg01065679	1	222245218
cg01069823	22	35796649	MCM5	NM_006739	Body
cg01072639	20	5891781	CHGB	NM_001819	TSS200
cg01072786	2	220107847	GLB1L	NM_024506	Body
cg01073332	20	62574023	UCKL1;MIR1914;MIR647	NM_017859;NR_031735;NR_030377	Body;TSS1500;Body
cg01074104	1	41324394
cg01074325	6	30138178	TRIM15	NM_033229	Body
cg01077178	10	22608674	COMMD3;BMI1	NM_012071;NM_005180	Body;TSS1500
cg01078772	20	30920486	KIF3B	NM_004798	3'UTR
cg01079738	1	182922427	C1orf14;C1orf14	NM_030933;NM_030933	1stExon;5'UTR
cg01079840	6	30520405	GNL1	NM_005275	Body
cg01079872	1	3302477	PRDM16;PRDM16	NM_022114;NM_199454	Body;Body
cg01080456	7	156177920
cg01080902	19	44039870	ZNF575	NM_174945	3'UTR
cg01080986	1	230244570	GALNT2	NM_004481	Body
cg01081584	15	40268610	EIF2AK4	NM_001013703	Body
cg01082299	6	31431969	HCP5	NM_006674	3'UTR
cg01085224	5	5139626	ADAMTS16	NM_139056	TSS1500
cg01087239	19	18385502	KIAA1683;KIAA1683;KIAA1683	NM_025249;NM_001145305;NM_001145304	TSS200;TSS200;TSS200
cg01089060	10	97050836	PDLIM1	NM_020992	TSS200
cg01090821	2	239066990
cg01091565	15	90294762	MESP1	NM_018670	TSS1500
cg01092811	3	131100455	NUDT16	NM_152395	TSS1500
cg01093878	2	131512663	FAM123C;FAM123C;FAM123C;FAM123C	NM_001105194;NM_152698;NM_001105195;NM_001105193	TSS1500;TSS1500;TSS1500;TSS1500
cg01094309	6	166901854	RPS6KA2;RPS6KA2	NM_021135;NM_001006932	Body;Body
cg01097196	11	71295678
cg01098785	12	69202458	MDM2;MDM2;MDM2;MDM2;MDM2;MDM2;MDM2;MDM2	NM_001145340;NM_006878;NM_006881;NM_006879;NM_002392;NM_001145339;NM_006882;NM_001145337	TSS1500;Body;Body;Body;Body;Body;Body;TSS1500
cg01099470	2	131103656	IMP4	NM_033416	Body
cg01100521	19	15132692	CCDC105	NM_173482	Body
cg01100796	1	53662040	CPT2	NM_000098	TSS200
cg01100864	12	122750645	VPS33A	NM_022916	Body
cg01100984	10	103454967	FBXW4	NM_022039	TSS1500
cg01101354	6	33219335	VPS52	NM_022553	Body
cg01101448	2	203019275
cg01101647	4	66535732	EPHA5;EPHA5	NM_182472;NM_004439	TSS200;TSS200
cg01101782	1	202778711	KDM5B	NM_006618	TSS1500
cg01103938	7	2614888	IQCE;IQCE	NM_001100390;NM_152558	Body;Body
cg01104334	1	92682514	C1orf146	NM_001012425	TSS1500
cg01105362	7	1059627	C7orf50;C7orf50;C7orf50	NM_001134395;NM_032350;NM_001134396	Body;Body;Body
cg01106040	3	126194903	ZXDC;ZXDC	NM_001040653;NM_025112	TSS200;TSS200
cg01109047	2	120979401	TMEM185B	NR_000034	Body
cg01110955	16	1706924	CRAMP1L	NM_020825	Body
cg01113488	6	119027122
cg01113680	13	43842067	ENOX1;ENOX1	NM_017993;NM_001127615	Body;Body
cg01114217	6	150922145	PLEKHG1	NM_001029884	5'UTR
cg01116810	22	24891153	C22orf45;C22orf45;UPB1	NR_028483;NR_028484;NM_016327	TSS1500;TSS1500;TSS200
cg01117269	10	416315	DIP2C	NM_014974	Body
cg01117384	20	56274096	PMEPA1;PMEPA1;PMEPA1;PMEPA1	NM_199171;NM_199170;NM_199169;NM_020182	5'UTR;5'UTR;Body;Body
cg01118653	16	88110441	BANP;BANP	NM_017869;NM_079837	3'UTR;3'UTR
cg01120165	22	50690152	HDAC10;HDAC10	NM_001159286;NM_032019	TSS1500;TSS1500
cg01124132	22	32599511	RFPL2;RFPL2;RFPL2	NM_001098527;NM_001159545;NM_001159546	TSS200;5'UTR;TSS1500
cg01124420	2	109605518	EDAR;EDAR	NM_022336;NM_022336	5'UTR;1stExon
cg01125010	17	76134099	TMC8	NM_152468	Body
cg01127320	3	126134977	CCDC37	NM_182628	Body
cg01128574	7	2058865	MAD1L1;MAD1L1;MAD1L1	NM_003550;NM_001013837;NM_001013836	Body;Body;Body
cg01129128	8	141034355	TRAPPC9;TRAPPC9	NM_001160372;NM_031466	Body;Body
cg01129847	19	2281919	C19orf35	NM_198532	5'UTR
cg01132568	9	116448416
cg01135538	17	43678735	LOC644172	NR_026901	Body
cg01135868	3	133380420	TOPBP1	NM_007027	5'UTR
cg01138728	7	97737017	LMTK2	NM_014916	Body
cg01139016	2	236656087	AGAP1;AGAP1	NM_014914;NM_001037131	Body;Body
cg01140006	16	57701999	GPR97	NM_170776	TSS200
cg01140293	20	35807911	RPN2;C20orf132;C20orf132;C20orf132;RPN2;C20orf132;C20orf132;C20orf132	NM_002951;NM_213631;NM_213632;NM_152503;NM_001135771;NM_152503;NM_213631;NM_213632	Body;1stExon;1stExon;1stExon;Body;5'UTR;5'UTR;5'UTR
cg01145389	1	51433840	CDKN2C	NM_001262	TSS1500
cg01145398	10	135075451
cg01145903	5	115697588
cg01147013	3	45017855	ZDHHC3;EXOSC7;EXOSC7;ZDHHC3;ZDHHC3	NM_016598;NM_015004;NR_023353;NM_001135179;NM_001135180	TSS200;Body;Body;TSS200;TSS200
cg01147714	2	173686002	RAPGEF4;RAPGEF4	NM_007023;NM_001100397	Body;TSS1500
cg01149259	3	47021396	NBEAL2	NM_015175	1stExon
cg01153613	6	139928856
cg01153817	11	17409509	KCNJ11;KCNJ11	NM_000525;NM_001166290	1stExon;5'UTR
cg01155023	14	77924721	C14orf133;AHSA1	NM_022067;NM_012111	TSS1500;Body
cg01156249	16	4714794	MGRN1;MGRN1;MGRN1;MGRN1	NM_015246;NM_001142291;NM_001142290;NM_001142289	Body;Body;Body;Body
cg01157146	21	42877638	TMPRSS2;TMPRSS2	NM_001135099;NM_005656	Body;5'UTR
cg01157470	6	170562328
cg01158447	2	190445074	SLC40A1	NM_014585	Body
cg01160692	17	1959620	HIC1;HIC1	NM_001098202;NM_006497	1stExon;5'UTR
cg01161042	4	2322052	ZFYVE28	NM_020972	Body
cg01161629	16	29493790
cg01165817	13	101086489	PCCA;PCCA	NM_001127692;NM_000282	Body;Body
cg01167556	12	56323639	DGKA	NM_001345	TSS1500
cg01168584	18	2903245	EMILIN2	NM_032048	Body
cg01169559	10	831247
cg01169778	9	136038690	GBGT1	NM_021996	5'UTR
cg01170124	12	108962900	ISCU;ISCU	NM_213595;NM_014301	3'UTR;3'UTR
cg01172785	16	50092553
cg01173611	11	59436746	PATL1	NM_152716	TSS1500
cg01174264	4	80992999	ANTXR2;ANTXR2	NM_058172;NM_001145794	Body;Body
cg01175610	12	12224246	BCL2L14;BCL2L14;BCL2L14	NM_138723;NM_138722;NM_030766	5'UTR;TSS200;TSS200
cg01176047	1	240655362	GREM2	NM_022469	3'UTR
cg01176715	2	211037310	C2orf67	NM_152519	TSS1500
cg01178899	3	45985168	CXCR6;FYCO1	NM_006564;NM_024513	5'UTR;Body
cg01178971	11	2464851	KCNQ1	NM_000218	TSS1500
cg01179012	2	131595107
cg01179986	1	249152877	ZNF692;ZNF692;ZNF692	NM_001136036;NM_017865;NM_001136036	5'UTR;5'UTR;1stExon
cg01181307	14	105714379	BRF1;BTBD6;BRF1	NM_145685;NM_033271;NM_001519	TSS200;TSS1500;Body
cg01181584	3	187439427	BCL6;BCL6;BCL6	NM_001134738;NM_001130845;NM_001706	3'UTR;3'UTR;3'UTR
cg01181681	1	223317364	TLR5	NM_003268	TSS1500
cg01182386	15	75182373	MPI	NM_002435	TSS200
cg01184139	5	180649358	TRIM41;TRIM41	NM_033549;NM_201627	TSS1500;TSS1500
cg01185502	20	60456503	CDH4	NM_001794	Body
cg01188914	22	22306263	PPM1F	NM_014634	5'UTR
cg01188936	12	80084361	PAWR	NM_002583	5'UTR
cg01192531	20	34287185	ROMO1;NFS1	NM_080748;NM_021100	TSS200;1stExon
cg01194073	14	101175302
cg01194468	9	33264774	SUGT1P1;CHMP5;BAG1	NR_003667;NM_016410;NM_004323	Body;TSS200;TSS200
cg01199931	21	45082112	RRP1B	NM_015056	Body
cg01199950	6	33281514	TAPBP;TAPBP;TAPBP	NM_172209;NM_003190;NM_172208	Body;Body;Body
cg01200051	7	55954647
cg01200642	11	111741995	ALG9;ALG9;ALG9;ALG9;ALG9;ALG9	NM_001077690;NM_001077692;NM_001077692;NM_024740;NM_001077691;NM_001077691	Body;1stExon;5'UTR;Body;1stExon;5'UTR
cg01200763	13	114241010	TFDP1;TFDP1	NR_026580;NM_007111	Body;Body
cg01200893	6	32785622	HLA-DOB	NM_002120	TSS1500
cg01201797	2	208635605	FZD5	NM_003468	TSS1500
cg01204439	7	144533322	TPK1;TPK1	NM_001042482;NM_022445	TSS200;TSS200
cg01205832	16	88371346
cg01206410	1	236229809	NID1	NM_002508	TSS1500
cg01206723	2	239696014
cg01206910	17	80416515	NARF;NARF;NARF;NARF	NM_001038618;NM_012336;NM_031968;NM_001083608	5'UTR;TSS200;TSS200;TSS200
cg01206915	10	74856003	P4HA1;P4HA1;P4HA1;P4HA1	NM_001017962;NM_001142596;NM_001142595;NM_000917	5'UTR;5'UTR;5'UTR;5'UTR
cg01207974	13	50703026
cg01210622	16	68405731	SMPD3	NM_018667	Body
cg01211097	16	84732969	USP10	NM_005153	TSS1500
cg01213128	5	138629571	MATR3;MATR3	NM_018834;NM_199189	5'UTR;5'UTR
cg01213331	16	15069449	PDXDC1	NM_015027	Body
cg01214054	16	1349406
cg01214900	4	66784395
cg01216370	2	228736459	WDR69	NM_178821	Body
cg01216679	16	2151284	PKD1;PKD1	NM_001009944;NM_000296	Body;Body
cg01217335	5	81267704	ATG10;ATG10	NM_031482;NM_001131028	TSS200;TSS200
cg01217475	4	65506367
cg01218587	14	38080904
cg01219426	11	95856658	MAML2	NM_032427	Body
cg01225086	12	121175417	ACADS	NM_000017	Body
cg01225850	6	30522985	GNL1;PRR3;PRR3	NM_005275;NM_025263;NM_001077497	Body;TSS1500;TSS1500
cg01228941	5	140553091	PCDHB7	NM_018940	1stExon
cg01230067	6	31239063	HLA-C	NM_002117	Body
cg01230406	8	140712499	KCNK9	NM_016601	Body
cg01231165	2	9695142	ADAM17	NM_003183	Body
cg01231183	17	79924542
cg01231620	14	23298884	MRPL52;MRPL52;MRPL52;MRPL52;MRPL52;MRPL52	NM_181305;NM_181307;NM_181304;NM_178336;NM_181306;NM_180982	TSS1500;TSS1500;TSS1500;TSS1500;TSS1500;TSS1500
cg01234308	12	132922130
cg01235083	8	38568348
cg01235172	7	157451618	PTPRN2;PTPRN2;PTPRN2	NM_002847;NM_130842;NM_130843	Body;Body;Body
cg01235479	14	73428635
cg01236573	1	26248897
cg01237501	16	87079313
cg01238264	14	105414737	AHNAK2	NM_138420	Body
cg01238435	5	141595696
cg01239922	5	191242	LRRC14B	NM_001080478	TSS1500
cg01240229	15	25101627	SNRPN;SNRPN;SNRPN;SNRPN	NM_022808;NM_022805;NM_022807;NM_022806	5'UTR;TSS200;5'UTR;5'UTR
cg01240444	12	124247047	DNAH10;DNAH10	NM_207437;NM_207437	1stExon;5'UTR
cg01240823	15	92667819	SLCO3A1;SLCO3A1	NM_001145044;NM_013272	Body;Body
cg01241624	16	3074425	HCFC1R1;HCFC1R1;THOC6;HCFC1R1;THOC6	NM_001002017;NM_017885;NM_024339;NM_001002018;NM_001142350	TSS200;TSS200;Body;TSS200;Body
cg01242196	6	33990181	GRM4	NM_000841	3'UTR
cg01242348	14	23586886	CEBPE	NM_001805	Body
cg01243892	1	29189934	OPRD1	NM_000911	3'UTR
cg01245423	9	98080212	FANCC	NM_000136	TSS1500
cg01246520	17	17644344	RAI1	NM_030665	5'UTR
cg01249544	10	69372655	CTNNA3;CTNNA3	NM_001127384;NM_013266	Body;Body
cg01249550	3	194353869	TMEM44;TMEM44;TMEM44;TMEM44	NM_001011655;NM_001166306;NM_001166305;NM_138399	1stExon;1stExon;1stExon;1stExon
cg01250603	10	122709029
cg01252136	2	26989503	C2orf18	NM_017877	Body
cg01252526	16	711033	WDR90	NM_145294	Body
cg01253753	12	8666295	CLEC4D;CLEC4D	NM_080387;NM_080387	1stExon;5'UTR
cg01254303	12	119592035	SRRM4	NM_194286	Body
cg01255458	6	32817847	TAP1	NM_000593	Body
cg01255465	6	31619581	BAT3;BAT3;BAT3;BAT3	NM_001098534;NM_004639;NM_080702;NM_080703	5'UTR;5'UTR;5'UTR;5'UTR
cg01256521	2	113011580	ZC3H8	NM_032494	Body
cg01257799	11	118753476	CXCR5	NM_001716	TSS1500
cg01259220	7	914964	C7orf20	NM_015949	TSS1500
cg01260502	7	150217081	GIMAP7	NM_153236	Body
cg01260541	6	119499554	MAN1A1	NM_005907	3'UTR
cg01261464	14	93673175	UBR7;C14orf142;UBR7	NM_175748;NM_032490;NM_001100417	TSS1500;1stExon;TSS1500
cg01264379	19	47617042	ZC3H4	NM_015168	TSS200
cg01266375	4	129643491
cg01267415	14	105119383
cg01267797	5	79542470	SERINC5	NM_178276	Body
cg01267908	21	46686908	POFUT2;POFUT2;POFUT2	NM_015227;NR_004858;NM_133635	3'UTR;Body;Body
cg01270033	16	14165057	MKL2	NM_014048	TSS200
cg01271485	2	55650017
cg01274625	3	9975870	CRELD1;CRELD1;CRELD1;CRELD1	NM_001031717;NM_015513;NM_015513;NM_001077415	5'UTR;1stExon;5'UTR;5'UTR
cg01274643	11	1283946
cg01274753	16	605144
cg01274826	19	12596128	ZNF709;ZNF709	NM_152601;NM_001145647	TSS1500;5'UTR
cg01275006	19	38876250	GGN	NM_152657	Body
cg01275661	10	5504438
cg01276031	14	88737828	KCNK10;KCNK10;KCNK10	NM_138318;NM_138317;NM_021161	TSS1500;Body;Body
cg01276327	12	110322142
cg01277603	22	50160014
cg01279933	19	10663970	ATG4D;KRI1	NM_032885;NM_023008	3'UTR;3'UTR
cg01280098	15	69116504	MIR548H4	NR_031680	Body
cg01280180	3	138047362	TXNDC6	NM_178130	5'UTR
cg01281450	12	68548770	IFNG	NM_000619	3'UTR
cg01281601	16	15931190	MYH11;MYH11;MYH11;MYH11	NM_022844;NM_002474;NM_001040114;NM_001040113	Body;Body;Body;Body
cg01283574	6	32799997	TAP2;TAP2	NM_000544;NM_018833	Body;Body
cg01283625	10	13568099
cg01287079	6	108888941	FOXO3;FOXO3	NM_001455;NM_201559	Body;Body
cg01288350	16	2136783	TSC2;TSC2;TSC2	NM_001077183;NM_000548;NM_001114382	Body;Body;Body
cg01289206	11	1772721	HCCA2	NM_053005	Body
cg01289544	2	27887409	SUPT7L;SLC4A1AP	NM_014860;NM_018158	TSS1500;1stExon
cg01290068	5	162932702	MAT2B;MAT2B	NM_013283;NM_182796	1stExon;Body
cg01291029	3	42814856	CCDC13	NM_144719	TSS200
cg01295034	16	48576092	N4BP1	NM_153029	3'UTR
cg01300291	3	194980397	C3orf21	NM_152531	Body
cg01301252	5	140724683	PCDHGA2;PCDHGA3;PCDHGA3;PCDHGA1	NM_018915;NM_018916;NM_032011;NM_018912	Body;1stExon;1stExon;Body
cg01301382	18	15198067
cg01304182	16	30409908	ZNF48	NM_152652	Body
cg01305421	12	102874286	IGF1;IGF1;IGF1;IGF1;IGF1;IGF1	NM_001111283;NM_000618;NM_001111285;NM_001111283;NM_000618;NM_001111285	5'UTR;5'UTR;5'UTR;1stExon;1stExon;1stExon
cg01306183	11	63057478	SLC22A10;SLC22A10	NM_001039752;NM_001039752	5'UTR;1stExon
cg01306614	5	72112331	TNPO1	NM_002270	TSS200
cg01307174	3	35722556	ARPP-21;ARPP-21;ARPP-21;ARPP-21;ARPP-21	NM_016300;NM_198399;NM_001025069;NM_198399;NM_001025068	5'UTR;1stExon;5'UTR;5'UTR;5'UTR
cg01307526	12	122252471	SETD1B	NM_015048	Body
cg01308483	5	1770031
cg01308806	19	4276778
cg01309328	6	32811253	PSMB8;PSMB8	NM_004159;NM_148919	Body;Body
cg01309395	6	33091795	HLA-DPB2	NR_001435	Body
cg01311341	22	25575246	KIAA1671	NM_001145206	Body
cg01313518	2	25584954
cg01314143	5	1799486	MRPL36	NM_032479	5'UTR
cg01315572	10	116391550	ABLIM1;ABLIM1;ABLIM1	NM_001003408;NM_001003407;NM_002313	Body;Body;Body
cg01315957	10	74114163	DNAJB12;DNAJB12	NM_017626;NM_001002762	Body;Body
cg01316535	19	9695235	ZNF121	NM_001008727	TSS200
cg01319583	16	224928
cg01320040	21	43430494	ZNF295;ZNF295;ZNF295;ZNF295;ZNF295;ZNF295	NM_001098402;NM_001098402;NM_020727;NM_001098403;NM_020727;NM_001098403	1stExon;5'UTR;5'UTR;5'UTR;1stExon;1stExon
cg01320698	1	9788517	PIK3CD	NM_005026	3'UTR
cg01321419	4	186718416	SORBS2;SORBS2;SORBS2;SORBS2;SORBS2	NM_003603;NM_021069;NM_001145670;NM_001145671;NM_001145672	5'UTR;5'UTR;5'UTR;5'UTR;5'UTR
cg01322142	4	786718	CPLX1	NM_006651	Body
cg01322897	12	51442056	LETMD1;LETMD1	NM_001024668;NM_015416	TSS200;TSS200
cg01324474	12	54758545	GPR84	NM_020370	TSS1500
cg01327169	3	183738470
cg01327685	13	112668501
cg01332054	15	74494861	STRA6;STRA6;STRA6;STRA6;STRA6	NM_001142617;NM_001142618;NM_001142619;NM_022369;NM_001142620	5'UTR;5'UTR;5'UTR;5'UTR;5'UTR
cg01332534	2	42066091
cg01332882	20	47874155	ZNFX1	NM_021035	Body
cg01336858	15	70154572
cg01337207	6	32063835	TNXB	NM_019105	Body
cg01338864	6	31691905	C6orf25;C6orf25;C6orf25;C6orf25;C6orf25;C6orf25	NM_138274;NM_138273;NM_138275;NM_138272;NM_025260;NM_138277	Body;Body;Body;Body;Body;Body
cg01340089	12	22199200	CMAS;CMAS	NM_018686;NM_018686	1stExon;5'UTR
cg01343624	7	51842120
cg01344056	16	83150590	CDH13	NM_001257	Body
cg01345727	13	52734018	NEK3;NEK3;NEK3;NEK3	NM_152720;NM_001146099;NR_027415;NM_002498	TSS1500;TSS200;TSS200;TSS200
cg01347553	12	1906764	CACNA2D4	NM_172364	Body
cg01348922	17	77707012	ENPP7	NM_178543	Body
cg01352906	1	206679195
cg01355876	5	131281439
cg01360795	3	138839804	BPESC1	NR_026783	Body
cg01363574	3	40354920
cg01363734	12	117482953	TESC;TESC;TESC	NR_031766;NM_017899;NM_001168325	Body;Body;Body
cg01364651	7	18067537	PRPS1L1	NM_175886	TSS200
cg01364769	10	22607608	COMMD3	NM_012071	Body
cg01365639	10	50975940
cg01366698	3	49397613	RHOA	NM_001664	3'UTR
cg01367992	1	160766535	LY9;LY9	NM_001033667;NM_002348	Body;Body
cg01370294	7	55414328
cg01371493	6	168916145	SMOC2;SMOC2	NM_022138;NM_001166412	Body;Body
cg01373166	22	24823389	ADORA2A	NM_000675	TSS200
cg01373852	13	113121958
cg01374047	16	3074170	HCFC1R1;HCFC1R1;HCFC1R1;THOC6;THOC6;THOC6;HCFC1R1;THOC6;HCFC1R1	NM_017885;NM_001002017;NM_001002017;NM_024339;NM_001142350;NM_024339;NM_001002018;NM_001142350;NM_017885	5'UTR;1stExon;5'UTR;1stExon;5'UTR;5'UTR;5'UTR;1stExon;1stExon
cg01377358	20	30948211	ASXL1;ASXL1	NM_015338;NM_001164603	Body;Body
cg01377523	16	48575545	N4BP1	NM_153029	3'UTR
cg01381934	3	52529064	STAB1	NM_015136	TSS1500
cg01382864	2	220174251	PTPRN	NM_002846	TSS200
cg01382900	6	13615583	NOL7;NOL7	NM_016167;NM_016167	5'UTR;1stExon
cg01383799	16	29819361	MAZ;MAZ	NM_002383;NM_001042539	Body;Body
cg01383911	6	30297627	TRIM39;TRIM39	NM_172016;NM_021253	Body;Body
cg01385533	2	1482597	TPO;TPO;TPO;TPO	NM_175719;NM_000547;NM_175721;NM_175722	Body;Body;Body;Body
cg01385862	1	35227029	GJB4	NM_153212	Body
cg01386335	7	17704951
cg01386424	6	100039476
cg01388437	8	145169676	KIAA1875	NR_024207	Body
cg01389445	4	155665106	LRAT	NM_004744	TSS200
cg01392313	6	33561181	C6orf227	NR_027908	TSS200
cg01394116	5	150081499	RBM22	NM_018047	TSS1500
cg01394255	17	8798062	PIK3R5;PIK3R5	NM_014308;NM_001142633	Body;Body
cg01396065	3	193789440
cg01396143	2	159825895	TANC1;TANC1	NM_001145909;NM_033394	5'UTR;5'UTR
cg01397513	16	85670135	KIAA0182;KIAA0182	NM_001134473;NM_014615	5'UTR;Body
cg01400040	15	61091220	RORA	NM_134261	Body
cg01401337	9	96339159	PHF2	NM_005392	Body
cg01404750	13	113493939	ATP11A;ATP11A	NM_015205;NM_032189	Body;Body
cg01404893	16	89043547	CBFA2T3	NM_005187	TSS200
cg01406280	11	69454447	CCND1	NM_053056	TSS1500
cg01406758	17	27279400	PHF12;PHF12	NM_001033561;NM_020889	TSS1500;TSS1500
cg01408486	5	139027024	CXXC5	NM_016463	TSS1500
cg01408915	9	136024341	RALGDS	NM_001042368	Body
cg01409207	12	117538129	TESC;TESC;TESC	NM_017899;NR_031766;NM_001168325	TSS1500;TSS1500;TSS1500
cg01416487	12	96252677	SNRPF	NM_003095	TSS200
cg01418385	5	140722587	PCDHGA2;PCDHGA3;PCDHGA1;PCDHGA3	NM_018915;NM_032011;NM_018912;NM_018916	Body;TSS1500;Body;TSS1500
cg01419136	5	121920864
cg01419567	8	77594595	ZFHX4;LOC100192378	NM_024721;NR_024360	5'UTR;Body
cg01419670	5	115696151
cg01419757	11	101918171	C11orf70	NM_032930	TSS200
cg01420492	20	37349817
cg01420589	4	119757735	SEC24D	NM_014822	TSS1500
cg01421994	8	90916395	OSGIN2;OSGIN2	NM_004337;NM_001126111	5'UTR;Body
cg01424562	14	69256677	ZFP36L1	NM_004926	Body
cg01426105	16	79807631
cg01427290	3	119396225	COX17;COX17	NM_005694;NM_005694	5'UTR;1stExon
cg01427849	8	59826463	TOX	NM_014729	Body
cg01428750	8	22222451
cg01429996	9	100819542	NANS	NM_018946	Body
cg01432878	16	69788859	NOB1	NM_014062	TSS200
cg01433109	1	2725631
cg01433836	2	205414107	PARD3B;PARD3B;PARD3B	NM_152526;NM_057177;NM_205863	Body;Body;Body
cg01434679	1	9775302	PIK3CD	NM_005026	Body
cg01436424	1	7669070	CAMTA1	NM_015215	Body
cg01436705	5	171434426	FBXW11;FBXW11;FBXW11	NM_033644;NM_012300;NM_033645	TSS1500;TSS1500;TSS1500
cg01439566	11	113932189	ZBTB16;ZBTB16	NM_001018011;NM_006006	5'UTR;5'UTR
cg01441127	1	181012492	MR1	NM_001531	Body
cg01441777	22	38714416	CSNK1E;CSNK1E	NM_001894;NM_152221	TSS1500;TSS1500
cg01441798	8	124054834	DERL1;DERL1	NM_001134671;NM_024295	TSS200;TSS200
cg01442426	3	46069366	XCR1;XCR1	NM_005283;NM_001024644	TSS1500;TSS1500
cg01442889	1	2415453	PLCH2	NM_014638	Body
cg01443390	4	1017903	FGFRL1;FGFRL1;FGFRL1	NM_001004358;NM_001004356;NM_021923	Body;Body;Body
cg01444004	2	11726968	GREB1;GREB1;GREB1	NM_014668;NM_033090;NM_148903	Body;Body;Body
cg01445578	10	22970764	PIP4K2A	NM_005028	Body
cg01445659	19	17414977	MRPL34;ABHD8	NM_023937;NM_024527	TSS1500;TSS1500
cg01446950	2	222435351	EPHA4	NM_004438	Body
cg01446989	1	222566256
cg01447096	1	229546894
cg01447281	1	8482689	RERE;RERE;RERE	NM_001042682;NM_012102;NM_001042681	5'UTR;Body;Body
cg01447475	2	30510887
cg01450522	3	13465878
cg01451205	11	119252210	USP2;USP2	NM_004205;NM_004205	1stExon;5'UTR
cg01453281	2	105475049
cg01454153	19	41620211	CYP2F1	NM_000774	TSS200
cg01454528	17	49243444	NME2;NME2;NME1-NME2;NME2;NME2	NM_002512;NM_001018138;NM_001018136;NM_001018137;NM_001018139	TSS200;TSS1500;Body;5'UTR;TSS1500
cg01454951	3	71730677	EIF4E3;EIF4E3;EIF4E3;EIF4E3	NM_001134651;NM_001134649;NM_173359;NM_001134650	3'UTR;3'UTR;3'UTR;3'UTR
cg01455178	1	205648187	SLC45A3	NM_033102	5'UTR
cg01456691	6	11382556	NEDD9;NEDD9	NM_001142393;NM_001142393	1stExon;5'UTR
cg01457654	22	26908608	TFIP11;TFIP11	NM_001008697;NM_012143	TSS200;TSS200
cg01460715	2	26257745	RAB10	NM_016131	Body
cg01461199	8	121822473	SNTB1	NM_021021	Body
cg01461211	16	85478908
cg01461847	6	27648057
cg01464835	19	30016147	VSTM2B	NM_001146339	TSS1500
cg01465364	10	135340721	CYP2E1	NM_000773	TSS200
cg01465596	1	42381916	HIVEP3;HIVEP3	NM_024503;NM_001127714	5'UTR;5'UTR
cg01465769	3	53226412	PRKCD;PRKCD	NM_212539;NM_006254	3'UTR;3'UTR
cg01466491	19	10523363
cg01467604	19	10676318	KRI1	NM_023008	Body
cg01468420	6	33393112	SYNGAP1	NM_006772	Body
cg01468505	2	201827750	ORC2L	NM_006190	5'UTR
cg01469887	2	175205716
cg01471264	2	119597415
cg01471621	6	34294716	NUDT3	NM_006703	Body
cg01472113	9	114658195	UGCG	NM_003358	TSS1500
cg01473128	6	31828335	NEU1	NM_000434	Body
cg01473155	2	177010984
cg01475325	11	76498701	TSKU	NM_015516	5'UTR
cg01475377	6	109611718
cg01477971	2	103405951	TMEM182	NM_144632	Body
cg01484156	8	102802615	NCALD;NCALD;NCALD;NCALD;NCALD;NCALD;NCALD;NCALD	NM_001040629;NM_001040624;NM_001040626;NM_001040630;NM_001040628;NM_001040625;NM_001040627;NM_032041	5'UTR;5'UTR;5'UTR;5'UTR;5'UTR;5'UTR;5'UTR;5'UTR
cg01486260	16	31379850	ITGAX	NM_000887	Body
cg01488659	13	100875702	PCCA;PCCA	NM_001127692;NM_000282	Body;Body
cg01489032	8	143877656
cg01489441	16	1764111	MAPK8IP3;MAPK8IP3	NM_001040439;NM_015133	Body;Body
cg01493563	6	33772366	MLN;MLN	NM_001040109;NM_002418	TSS1500;TSS1500
cg01493658	9	133588893	ABL1	NM_007313	TSS1500
cg01495509	5	169816378	KCNIP1;KCNMB1;KCNMB1	NM_001034838;NM_004137;NM_004137	Body;1stExon;5'UTR
cg01495521	16	978040	LMF1	NM_022773	Body
cg01496203	4	121843035	PRDM5	NM_018699	Body
cg01496790	11	75526283	UVRAG;UVRAG	NM_003369;NM_003369	5'UTR;1stExon
cg01500140	19	51890586	LIM2;LIM2	NM_001161748;NM_030657	Body;Body
cg01501048	1	155247548	HCN3	NM_020897	1stExon
cg01501760	22	40738706
cg01502320	17	16875558	TNFRSF13B	NM_012452	TSS200
cg01504589	11	110039774	ZC3H12C	NM_033390	3'UTR
cg01505312	11	56258856	OR5M8;OR8U8	NM_001005282;NM_001013356	TSS200;Body
cg01505556	6	30174125	TRIM26	NM_003449	5'UTR
cg01506766	13	46626746	ZC3H13	NM_015070	5'UTR
cg01509330	6	170535724
cg01511234	12	92459079
cg01511742	3	71112437	FOXP1	NM_032682	Body
cg01512787	11	36476319	PRR5L;PRR5L;PRR5L;PRR5L	NM_024841;NM_001160167;NM_001160169;NM_001160168	Body;Body;Body;Body
cg01513661	22	50781987	SAPS2	NM_014678	5'UTR
cg01514668	11	43602179	MIR129-2	NR_029697	TSS1500
cg01515802	19	54876749	LAIR1;LAIR1	NM_021706;NM_002287	TSS200;TSS200
cg01515913	1	39339553	MYCBP	NM_012333	TSS1500
cg01516466	9	3526944	RFX3;RFX3	NM_134428;NM_002919	TSS1500;TSS1500
cg01517521	13	27746040	USP12	NM_182488	TSS200
cg01517832	11	1329962	TOLLIP;LOC255512	NM_019009;NR_029409	Body;TSS1500
cg01517940	14	69865233	SLC39A9;ERH	NM_018375;NM_004450	TSS200;TSS1500
cg01518465	12	49351708	ARF3	NM_001659	TSS1500
cg01518977	19	41768456	HNRNPUL1;HNRNPUL1	NM_144732;NM_144732	1stExon;5'UTR
cg01519094	11	125034181	PKNOX2	NM_022062	TSS1500
cg01519261	21	36421467	RUNX1;RUNX1	NM_001754;NM_001754	5'UTR;1stExon
cg01519464	1	24861818	RCAN3	NM_013441	3'UTR
cg01521143	19	3043274	TLE2	NM_001144761	Body
cg01521397	20	60590872	TAF4	NM_003185	Body
cg01521449	21	47855049	PCNT	NM_006031	Body
cg01521688	12	3131390	TEAD4;TEAD4;TEAD4	NM_003213;NM_201441;NM_201443	Body;Body;Body
cg01522243	11	2290615	ASCL2	NM_005170	3'UTR
cg01522296	22	50452415	IL17REL	NM_001001694	TSS1500
cg01525597	12	1739061	WNT5B;WNT5B	NM_030775;NM_032642	5'UTR;5'UTR
cg01526498	14	101416558
cg01531198	14	70354846	SMOC1;SMOC1	NM_001034852;NM_022137	Body;Body
cg01532218	6	30524746	PRR3;PRR3;PRR3;GNL1;PRR3;GNL1	NM_025263;NM_001077497;NM_025263;NM_005275;NM_001077497;NM_005275	5'UTR;5'UTR;1stExon;5'UTR;1stExon;1stExon
cg01534799	16	2961000	FLYWCH1;FLYWCH1	NM_032296;NM_020912	TSS1500;TSS1500
cg01535726	8	9911482	MSRA;MSRA	NM_012331;NM_001135670	TSS1500;TSS1500
cg01536979	8	117840383
cg01537665	6	157009094
cg01538305	14	100658948
cg01538969	6	30624636	DHX16;DHX16	NM_001164239;NM_003587	Body;Body
cg01539948	4	174427487
cg01541398	17	65040983	CACNG1	NM_000727	1stExon
cg01541581	16	31724812	ZNF720	NM_001130913	Body
cg01543184	17	79881543	MAFG;MAFG	NM_002359;NM_032711	5'UTR;TSS200
cg01543307	4	184390449
cg01545242	19	14248090	ASF1B	NM_018154	TSS1500
cg01545964	6	28500501	GPX5;GPX5	NM_001509;NM_003996	Body;3'UTR
cg01546397	16	451643	DECR2	NM_020664	TSS1500
cg01547069	7	139877097	LOC100134229;JHDM1D	NR_024451;NM_030647	Body;TSS1500
cg01549977	14	65743867
cg01551258	17	30479187	RHOT1;ARGFXP2;RHOT1;RHOT1	NM_001033568;NR_002222;NM_018307;NM_001033566	Body;TSS1500;Body;Body
cg01552504	16	50188903	PAPD5;PAPD5	NM_001040285;NM_001040284	Body;Body
cg01554529	1	11722935	FBXO6;FBXO44;FBXO44;FBXO44;FBXO44	NM_018438;NM_183413;NM_033182;NM_001014765;NM_183412	TSS1500;3'UTR;3'UTR;3'UTR;3'UTR
cg01554777	4	154622943	TLR2	NM_003264	5'UTR
cg01555614	6	50786369	TFAP2B	NM_003221	TSS200
cg01556246	8	8204802	PRAGMIN	NM_001080826	Body
cg01556552	1	10695686
cg01557411	1	28587248	SESN2	NM_031459	Body
cg01557791	16	72042693	DHODH	NM_001361	Body
cg01558916	19	11804727
cg01561160	8	98637229
cg01564818	3	9464436	SETD5	NM_001080517	5'UTR
cg01565438	17	33776554	SLFN13	NM_144682	TSS1500
cg01565508	17	8869961	PIK3R5	NM_001142633	TSS1500
cg01566692	16	18933346	SMG1	NM_015092	Body
cg01567615	13	114808107	RASA3	NM_007368	Body
cg01568433	3	50367341	RASSF1;RASSF1;RASSF1;RASSF1	NM_170714;NM_007182;NM_170713;NM_170712	3'UTR;3'UTR;3'UTR;3'UTR
cg01569052	16	2837641	PRSS33	NM_152891	TSS1500
cg01569660	15	65369213	LOC390594	NM_001101362	1stExon
cg01569664	13	110434016	IRS2	NM_003749	Body
cg01571722	3	130466871	PIK3R4	NM_014602	TSS1500
cg01572696	4	995849	IDUA	NM_000203	Body
cg01572940	2	45398381
cg01574390	16	21623651	METTL9;METTL9	NM_001077180;NM_016025	Body;Body
cg01576340	1	9970659	CTNNBIP1;CTNNBIP1	NM_001012329;NM_020248	TSS1500;TSS1500
cg01578324	6	31704774	CLIC1	NM_001288	TSS1500
cg01580574	2	134949671
cg01581098	7	105754353	SYPL1	NM_006754	TSS1500
cg01581637	12	49463804	RHEBL1	NM_144593	TSS200
cg01583514	19	3730768	TJP3	NM_014428	Body
cg01583753	2	39470725
cg01584086	11	10373718
cg01584389	6	32366417	BTNL2	NM_019602	Body
cg01586056	7	2595269	C7orf27	NM_152743	TSS200
cg01586116	2	134326017	NCKAP5;NCKAP5;NCKAP5;NCKAP5	NM_207363;NM_207481;NM_207481;NM_207363	1stExon;1stExon;5'UTR;5'UTR
cg01586609	11	113846937	HTR3A;HTR3A;HTR3A	NM_000869;NM_001161772;NM_213621	Body;TSS1500;Body
cg01588250	8	54427263
cg01588455	14	104940658
cg01589760	11	537487	LRRC56	NM_198075	TSS200
cg01590699	2	238475313	PRLH	NM_015893	1stExon
cg01590753	4	177714373	VEGFC	NM_005429	TSS1500
cg01592081	3	13935759
cg01593751	17	52977904	TOM1L1	NM_005486	TSS200
cg01594514	11	67374213	NDUFV1;NDUFV1	NM_001166102;NM_007103	TSS200;TSS200
cg01595717	9	140586201	EHMT1;EHMT1	NM_024757;NM_001145527	Body;Body
cg01595951	5	54834655
cg01598222	5	65221537	ERBB2IP;ERBB2IP	NM_001006600;NM_018695	TSS1500;TSS1500
cg01599709	5	139725677	HBEGF	NM_001945	Body
cg01599714	8	142285223
cg01603095	12	40500139	SLC2A13	NM_052885	TSS1500
cg01603247	5	1338340	CLPTM1L	NM_030782	Body
cg01603912	16	88039185	BANP;BANP	NM_017869;NM_079837	Body;Body
cg01606576	14	50065185	PPIL5;PPIL5	NM_203467;NM_152329	TSS1500;TSS1500
cg01606770	1	97279796	PTBP2	NM_021190	3'UTR
cg01607187	1	167060565	GPA33	NM_005814	TSS1500
cg01609705	8	38240669	WHSC1L1;WHSC1L1	NM_017778;NM_023034	TSS1500;TSS1500
cg01610123	5	134770100
cg01610979	4	8193310
cg01612220	14	104621176	KIF26A	NM_015656	Body
cg01612440	4	3296283
cg01612656	4	7763618	AFAP1;AFAP1;LOC84740	NM_001134647;NM_198595;NR_026892	3'UTR;3'UTR;Body
cg01613294	22	36557607	APOL3;APOL3;APOL3;APOL3;APOL3;APOL3	NM_145641;NR_027835;NR_027834;NM_145640;NR_027833;NM_145642	5'UTR;TSS1500;TSS1500;TSS1500;TSS1500;5'UTR
cg01614041	6	34123414
cg01614726	1	26633154	UBXN11;UBXN11;UBXN11;UBXN11;UBXN11	NM_001077262;NM_001077262;NM_145345;NM_183008;NM_183008	5'UTR;1stExon;5'UTR;1stExon;5'UTR
cg01614898	5	3736816
cg01616568	12	25539612
cg01616732	20	60795457	HRH3	NM_007232	TSS200
cg01617117	2	37384381	EIF2AK2;EIF2AK2	NM_001135651;NM_002759	TSS200;TSS200
cg01618660	9	100882376	TRIM14;TRIM14;TRIM14;TRIM14	NM_033220;NM_033219;NM_033221;NM_014788	TSS1500;TSS1500;TSS1500;TSS1500
cg01620208	8	142311010
cg01620248	14	105265453	ZBTB42	NM_001137601	TSS1500
cg01622718	7	158363414	PTPRN2;PTPRN2;PTPRN2	NM_002847;NM_130842;NM_130843	Body;Body;Body
cg01622948	21	45811547	TRPM2	NM_003307	Body
cg01627483	1	32708341	MTMR9L	NR_026850	TSS1500
cg01631375	19	18632968	ELL	NM_006532	TSS200
cg01632188	14	77731074	MIR1260	NR_031661	TSS1500
cg01633848	5	68855560	GTF2H2C;GTF2H2D	NM_001098728;NM_001042490	TSS1500;TSS1500
cg01637169	3	13459281	NUP210	NM_024923	Body
cg01640437	11	65405484	SIPA1	NM_006747	TSS200
cg01642579	16	4746990	ANKS3	NM_133450	3'UTR
cg01642786	12	120820319
cg01644640	2	40147801
cg01649597	2	232395061	NMUR1	NM_006056	Body
cg01649661	2	108086096
cg01650245	12	105626788	APPL2	NM_018171	Body
cg01650864	7	25734378
cg01652078	16	81726134	CMIP;CMIP	NM_030629;NM_198390	Body;Body
cg01653868	16	56898622	SLC12A3;SLC12A3;SLC12A3	NM_001126107;NM_001126108;NM_000339	TSS1500;TSS1500;TSS1500
cg01655658	6	30227583	HLA-L	NR_027822	Body
cg01655667	14	104808652
cg01658444	16	25100355
cg01659279	8	140802195	TRAPPC9;TRAPPC9	NM_001160372;NM_031466	Body;Body
cg01660716	14	105667315
cg01666652	14	22987689
cg01666985	7	73820652
cg01667634	6	31860439	EHMT2;EHMT2	NM_006709;NM_025256	Body;Body
cg01667702	17	7836604	TRAPPC1;CNTROB;CNTROB;TRAPPC1;TRAPPC1;TRAPPC1	NM_021210;NM_001037144;NM_053051;NR_030697;NM_001166621;NR_030684	TSS1500;1stExon;1stExon;TSS1500;TSS1500;TSS1500
cg01670789	14	101037264	BEGAIN	NM_020836	TSS1500
cg01673307	6	32819911	TAP1	NM_000593	Body
cg01674777	8	1861037	ARHGEF10	NM_014629	Body
cg01676182	18	20139875
cg01676552	8	146156633	ZNF16;ZNF16	NM_006958;NM_001029976	Body;Body
cg01676795	7	75586348	POR	NM_000941	Body
cg01676962	8	91997001
cg01677386	11	118938358	VPS11	NM_021729	TSS200
cg01683044	12	54410632	HOXC4;HOXC6;HOXC5	NM_014620;NM_153693;NR_003084	TSS200;TSS200;TSS200
cg01686177	7	21452797
cg01687389	16	53064480
cg01688141	8	23539808	NKX3-1	NM_006167	Body
cg01689029	6	37138238	PIM1;PIM1	NM_002648;NM_002648	5'UTR;1stExon
cg01689404	17	35423942
cg01690062	14	61125450
cg01692379	6	30044259	RNF39;RNF39	NM_025236;NM_170769	TSS1500;TSS1500
cg01692626	14	102504880	DYNC1H1	NM_001376	Body
cg01693830	3	127790462	SEC61A1	NM_013336	3'UTR
cg01694276	14	105247329	AKT1;AKT1;AKT1	NM_001014431;NM_005163;NM_001014432	Body;Body;Body
cg01694451	11	1854224	SYT8	NM_138567	TSS1500
cg01694488	4	1580172
cg01696784	2	235904501	SH3BP4	NM_014521	5'UTR
cg01697487	17	48588559	MYCBPAP	NM_032133	Body
cg01699819	7	1052092	C7orf50;C7orf50;C7orf50	NM_001134395;NM_032350;NM_001134396	Body;Body;Body
cg01701504	12	132682608	GALNT9;GALNT9	NM_001122636;NM_021808	Body;Body
cg01703162	6	2874553
cg01706819	2	27487792
cg01706991	8	104185501	BAALC;BAALC	NM_024812;NM_001024372	Body;Body
cg01707127	16	947051	LMF1	NM_022773	Body
cg01707313	17	77536389
cg01707330	6	30290408	HCG18;HCG18	NR_024052;NR_024053	Body;Body
cg01709551	10	134892649
cg01709689	7	1452073
cg01710084	6	33391146	SYNGAP1	NM_006772	Body
cg01710158	11	65081843	CDC42EP2	NM_006779	TSS1500
cg01711344	11	67770404	UNC93B1	NM_030930	Body
cg01712428	7	73132139	STX1A;STX1A	NM_001165903;NM_004603	Body;Body
cg01714823	3	195269708	PPP1R2	NM_006241	Body
cg01717649	11	66821665
cg01719141	9	140513215	C9orf37;C9orf37;EHMT1;EHMT1	NM_032937;NM_032937;NM_024757;NM_001145527	5'UTR;1stExon;TSS1500;TSS1500
cg01719157	11	4629606	TRIM68	NM_018073	TSS200
cg01719780	1	157126054
cg01719832	1	11752772	MAD2L2;C1orf187	NM_001127325;NM_198545	TSS1500;5'UTR
cg01719995	4	144104893	USP38	NM_032557	TSS1500
cg01723934	17	46680461	LOC404266;LOC404266;HOXB6	NR_033204;NR_033201;NM_018952	Body;Body;5'UTR
cg01727854	16	81743842	CMIP;CMIP	NM_198390;NM_030629	3'UTR;3'UTR
cg01728507	4	3563357
cg01729262	1	933306
cg01730258	11	65617742	SNX32	NM_152760	Body
cg01731204	1	31194554	MATN1	NM_002379	Body
cg01731360	5	49736671	EMB	NM_198449	Body
cg01731685	22	17565455	IL17RA	NM_014339	TSS1500
cg01732469	7	72788024
cg01733438	17	75276069	2018-09-09	NM_001113491	TSS1500
cg01734045	4	109967535	COL25A1;COL25A1	NM_198721;NM_032518	Body;Body
cg01735049	16	9187613	C16orf72	NM_014117	Body
cg01735277	15	75077691	CSK;CSK	NM_004383;NM_001127190	5'UTR;5'UTR
cg01736278	10	931793	LARP4B	NM_015155	TSS200
cg01736389	4	7706665	SORCS2	NM_020777	Body
cg01737554	17	33866071	SLFN12L	NM_001145027	TSS1500
cg01738457	11	86207067	ME3;ME3;ME3	NM_006680;NM_001161586;NM_001014811	Body;Body;Body
cg01740367	2	27294264	LOC100128731	NM_001134693	Body
cg01740766	6	44528958
cg01741836	5	95996644	CAST;CAST;CAST;CAST;CAST	NM_001042441;NM_001042440;NM_173063;NM_001042442;NM_001750	TSS1500;TSS1500;TSS1500;TSS1500;TSS1500
cg01748970	14	62088363
cg01749569	12	69678096
cg01750051	2	178087938	HNRNPA3	NM_194247	3'UTR
cg01751584	9	100159780	LOC286359	NR_026847	TSS1500
cg01753595	9	137533141	COL5A1	NM_000093	TSS1500
cg01753788	8	145024929	PLEC1;PLEC1;PLEC1;PLEC1;PLEC1	NM_201380;NM_000445;NM_201380;NM_201378;NM_201379	5'UTR;Body;1stExon;Body;Body
cg01755728	3	49449714	TCTA;TCTA;RHOA	NM_022171;NM_022171;NM_001664	1stExon;5'UTR;TSS200
cg01756730	12	57483513	NAB2	NM_005967	Body
cg01758870	7	23719630	C7orf46;C7orf46;C7orf46	NM_199136;NM_001127364;NM_001127365	TSS200;TSS200;TSS200
cg01759870	14	105936409	MTA1	NM_004689	Body
cg01763173	2	171674437	GAD1;GAD1	NM_000817;NM_013445	5'UTR;5'UTR
cg01763702	7	1199903	ZFAND2A	NM_182491	TSS200
cg01765164	16	84953424
cg01765380	16	87514262	ZCCHC14	NM_015144	Body
cg01765641	3	17781888	TBC1D5;TBC1D5;TBC1D5	NM_014744;NM_014744;NM_001134380	1stExon;5'UTR;5'UTR
cg01767230	6	88414961
cg01767927	17	78821024	RPTOR;RPTOR	NM_001163034;NM_020761	Body;Body
cg01768342	1	26517056	CATSPER4	NM_198137	TSS200
cg01768697	14	100613226	DEGS2	NM_206918	Body
cg01768868	17	38613760	IGFBP4	NM_001552	3'UTR
cg01769457	1	15930094
cg01771871	8	81989312	PAG1	NM_018440	5'UTR
cg01772073	6	79948298
cg01772149	1	3038216	PRDM16;PRDM16	NM_022114;NM_199454	Body;Body
cg01772743	21	45576085
cg01773185	14	74724152	VSX2	NM_182894	Body
cg01773515	19	7584680	ZNF358	NM_018083	Body
cg01774108	2	214016113	IKZF2;IKZF2	NM_016260;NM_001079526	TSS1500;5'UTR
cg01774159	8	80524467	STMN2	NM_007029	Body
cg01774335	17	5288654	RABEP1;RABEP1	NM_004703;NM_001083585	3'UTR;3'UTR
cg01774645	1	161040044	ARHGAP30;ARHGAP30	NM_181720;NM_001025598	TSS1500;TSS1500
cg01775612	16	31484199	TGFB1I1;TGFB1I1;TGFB1I1	NM_001042454;NM_015927;NM_001164719	Body;TSS1500;5'UTR
cg01776278	7	149472049	SSPO	NM_198455	TSS1500
cg01777861	4	56023843
cg01778054	6	158834153	TULP4;TULP4	NM_020245;NM_001007466	Body;Body
cg01778153	11	18035136	SERGEF	NM_012139	TSS1500
cg01782024	1	91989267	CDC7;CDC7;CDC7	NM_003503;NM_001134420;NM_001134419	Body;Body;Body
cg01782132	16	28936054	RABEP2	NM_024816	Body
cg01783353	11	63994292	TRPT1;NUDT22;TRPT1;TRPT1;TRPT1;TRPT1;NUDT22;TRPT1;NUDT22	NM_031472;NM_001128613;NM_001160389;NM_001160392;NM_001033678;NM_001160393;NM_032344;NM_001160390;NM_001128612	TSS1500;Body;TSS1500;TSS1500;TSS1500;TSS1500;Body;TSS1500;Body
cg01785706	12	118570077
cg01787084	16	87371097	FBXO31;FBXO31	NR_024568;NM_024735	Body;Body
cg01787944	1	2928145
cg01789150	1	28241495	RPA2	NM_002946	TSS1500
cg01789499	4	81109888	PRDM8	NM_020226	5'UTR
cg01790353	1	17674483	PADI4	NM_012387	Body
cg01790498	7	44888626	H2AFV;H2AFV;H2AFV;H2AFV;H2AFV	NM_201516;NM_012412;NM_201436;NM_138635;NM_201517	TSS1500;TSS1500;TSS1500;TSS1500;TSS1500
cg01791798	5	66338067	MAST4;MAST4	NM_015183;NM_001164664	Body;Body
cg01792876	8	116684801
cg01794103	15	78342494	TBC1D2B;TBC1D2B	NM_144572;NM_015079	Body;Body
cg01798251	2	85109273	C2orf89	NM_001080824	TSS1500
cg01799602	17	26894979	PIGS	NM_033198	Body
cg01800148	1	9130886	SLC2A5;SLC2A5;SLC2A5	NM_001135585;NR_024180;NM_003039	TSS1500;Body;TSS1500
cg01800442	17	74086473	EXOC7;EXOC7;EXOC7;EXOC7;EXOC7;EXOC7	NM_001145298;NM_001145297;NM_015219;NR_028133;NM_001145299;NM_001013839	Body;Body;Body;Body;Body;Body
cg01804193	12	63026212
cg01804528	11	75167027	GDPD5	NM_030792	Body
cg01805890	16	75271872	BCAR1;BCAR1;BCAR1;BCAR1;BCAR1;BCAR1;BCAR1;BCAR1;BCAR1	NM_001170718;NM_001170719;NM_001170721;NM_001170715;NM_001170720;NM_014567;NM_001170714;NM_001170716;NM_001170717	Body;Body;Body;Body;Body;Body;Body;Body;Body
cg01806346	4	6576585	MAN2B2	NM_015274	TSS1500
cg01806590	14	23066421	ABHD4	NM_022060	TSS1500
cg01807408	3	87137933
cg01807741	11	15649984
cg01808053	4	77603548	SHROOM3	NM_020859	Body
cg01808130	6	8435206	SLC35B3;SLC35B3;SLC35B3	NM_001142540;NM_015948;NM_001142541	5'UTR;5'UTR;5'UTR
cg01810267	5	118603742	TNFAIP8	NM_001077654	TSS1500
cg01810593	8	22464288	KIAA1967;KIAA1967	NM_021174;NM_199205	Body;Body
cg01810763	12	104683571	TXNRD1;TXNRD1;TXNRD1;TXNRD1;TXNRD1	NM_182729;NM_182743;NM_001093771;NM_003330;NM_182742	5'UTR;5'UTR;Body;Body;5'UTR
cg01811796	1	26233565	STMN1;STMN1;STMN1;STMN1	NM_005563;NM_203401;NM_001145454;NM_203399	TSS1500;TSS1500;TSS1500;TSS200
cg01812047	1	44482771	SLC6A9;SLC6A9;SLC6A9	NM_001024845;NM_201649;NM_006934	Body;1stExon;1stExon
cg01813139	9	139580970	AGPAT2;AGPAT2	NM_006412;NM_001012727	Body;Body
cg01813335	2	233215939
cg01817885	5	59165136	PDE4D;PDE4D	NM_001165899;NM_001104631	Body;Body
cg01818027	3	183164750
cg01819306	8	79716458	IL7	NM_000880	Body
cg01819759	13	79234251	RNF219	NM_024546	TSS1500
cg01820192	21	44869762	C21orf125	NR_026960	TSS200
cg01820954	6	37094888
cg01825806	6	90594966
cg01827195	2	226265799	KIAA1486	NM_020864	5'UTR
cg01827726	7	2673408	TTYH3	NM_025250	Body
cg01829163	16	87871160	SLC7A5	NM_003486	Body
cg01831160	3	13034632	IQSEC1	NM_001134382	Body
cg01833923	17	47286719	GNGT2;ABI3;ABI3;GNGT2	NM_031498;NM_016428;NM_001135186;NM_031498	1stExon;TSS1500;TSS1500;5'UTR
cg01834029	20	43101753
cg01837777	17	38136779	PSMD3	NM_002809	TSS1500
cg01837846	2	23755343	KLHL29	NM_052920	5'UTR
cg01837969	15	38364996
cg01838863	16	87736832	LOC100129637	NR_024488	Body
cg01840268	6	26402776	BTN3A1;BTN3A1;BTN3A1;BTN3A1	NM_007048;NM_001145008;NM_194441;NM_001145009	5'UTR;5'UTR;5'UTR;5'UTR
cg01844176	12	27176208	MED21	NM_004264	Body
cg01845501	5	31619428
cg01847380	1	40366596	MYCL1;MYCL1;MYCL1	NM_001033081;NM_001033082;NM_005376	Body;Body;Body
cg01847620	20	60905922	LAMA5	NM_005560	Body
cg01849093	11	110876141
cg01850561	3	77214150	ROBO2;ROBO2	NM_001128929;NM_002942	Body;Body
cg01852186	12	81192282	LIN7A	NM_004664	3'UTR
cg01857019	15	57210107	LOC145783;TCF12;TCF12;TCF12;TCF12	NR_015419;NM_207037;NM_207036;NM_003205;NM_207038	Body;TSS1500;TSS1500;TSS1500;TSS1500
cg01858895	5	139094177
cg01859528	14	90323701	C14orf143	NM_145231	Body
cg01860774	14	64969374	ZBTB25	NM_006977	5'UTR
cg01861349	15	75198956	C15orf17	NM_020447	1stExon
cg01861740	7	2764486
cg01864127	5	1324183	CLPTM1L	NM_030782	Body
cg01864699	6	122789987	SERINC1	NM_020755	Body
cg01864982	19	54409631	PRKCG	NM_002739	Body
cg01867764	14	22986466
cg01869229	8	144417236	TOP1MT	NM_052963	TSS200
cg01869896	1	40420299	MFSD2A;MFSD2A	NM_032793;NM_001136493	TSS1500;TSS1500
cg01870907	17	77775687
cg01871695	7	127841729
cg01873236	5	138088662	CTNNA1	NM_001903	TSS1500
cg01873311	16	89268689
cg01873977	8	125699897	MTSS1	NM_014751	Body
cg01876978	2	11970145
cg01877920	16	73178257
cg01879458	19	50529288	VRK3;ZNF473;ZNF473;VRK3;ZNF473;ZNF473	NM_016440;NM_015428;NM_015428;NM_001025778;NM_001006656;NM_001006656	TSS1500;5'UTR;1stExon;TSS1500;1stExon;5'UTR
cg01880399	4	187590579	FAT1	NM_005245	Body
cg01880929	2	36614588	CRIM1	NM_016441	Body
cg01881094	2	180872142	CWC22	NM_020943	TSS1500
cg01881378	16	88560088	ZFPM1	NM_153813	Body
cg01881688	8	145897116
cg01882471	2	99389829
cg01883777	22	38201848	H1F0	NM_005318	1stExon
cg01885783	22	20288286
cg01885814	21	46910559	COL18A1;COL18A1;COL18A1	NM_130444;NM_030582;NM_130445	Body;Body;Body
cg01886077	2	98612542	TMEM131	NM_015348	TSS200
cg01886524	3	128225824	LOC90246	NR_026954	TSS1500
cg01888206	1	36850933	STK40	NM_032017	5'UTR
cg01888251	6	33209204
cg01889025	17	75093989
cg01889169	7	927986	C7orf20	NM_015949	Body
cg01889897	14	104387210	C14orf2;C14orf2	NM_001127393;NM_004894	Body;5'UTR
cg01893669	2	39664969	MAP4K3	NM_003618	TSS1500
cg01894064	4	154073371	TRIM2	NM_001130067	TSS1500
cg01895333	3	109035405	DPPA2	NM_138815	TSS200
cg01898867	2	219718848
cg01900413	11	128419356	ETS1	NM_001143820	Body
cg01901022	13	112874796
cg01901579	14	95615731	DICER1	NM_177438	5'UTR
cg01902605	5	78366076	BHMT2;DMGDH	NM_017614;NM_013391	Body;TSS1500
cg01904776	16	2153834	PKD1;PKD1	NM_001009944;NM_000296	Body;Body
cg01905773	17	79297618	TMEM105	NM_178520	5'UTR
cg01907098	21	45149141	PDXK	NM_003681	Body
cg01907476	1	148929710	LOC645166;LOC645166;LOC645166	NR_027354;NR_027356;NR_027355	TSS1500;Body;Body
cg01908272	16	2053627	ZNF598	NM_178167	Body
cg01908902	5	688677	TPPP	NM_007030	5'UTR
cg01909364	17	41739926	MEOX1;MEOX1;MEOX1	NM_013999;NM_001040002;NM_004527	TSS1500;TSS1500;TSS1500
cg01911077	11	64531743
cg01913505	6	49901645
cg01916400	5	155548458
cg01916632	6	107781506	PDSS2	NM_020381	TSS1500
cg01917657	22	50617092	PANX2;PANX2;PANX2	NM_052839;NR_027691;NM_001160300	Body;Body;Body
cg01918081	7	98988510	ARPC1B	NM_005720	Body
cg01921423	4	39452766	KLB	NM_175737	3'UTR
cg01922090	7	4684301
cg01922684	6	142597201
cg01923089	12	49627746
cg01923516	7	3989167	SDK1	NM_152744	Body
cg01923873	4	154049200
cg01924880	4	5892208	CRMP1	NM_001014809	Body
cg01925393	1	24194307	FUCA1	NM_000147	Body
cg01925883	1	152062567	TCHHL1	NM_001008536	TSS1500
cg01925950	13	115022228	CDC16;CDC16	NM_003903;NM_001078645	Body;Body
cg01926972	6	168476576	FRMD1;FRMD1	NM_001122841;NM_024919	TSS200;Body
cg01927825	1	2121724	C1orf86;LOC100128003;C1orf86	NM_001146310;NR_024445;NM_182533	Body;Body;Body
cg01928136	2	1683948	PXDN	NM_012293	Body
cg01928807	6	6005210	NRN1	NM_016588	Body
cg01929530	17	35767072	ACACA;TADA2A;ACACA;TADA2A;TADA2A	NM_198839;NM_001488;NM_198834;NM_001166105;NM_133439	TSS200;TSS1500;TSS200;5'UTR;TSS1500
cg01932091	1	29213675	EPB41;EPB41;EPB41;EPB41;EPB41;EPB41;EPB41;EPB41;EPB41;EPB41	NM_203343;NM_001166007;NM_001166005;NM_004437;NM_203343;NM_203342;NM_004437;NM_001166007;NM_203342;NM_001166005	1stExon;5'UTR;5'UTR;1stExon;5'UTR;5'UTR;5'UTR;1stExon;1stExon;1stExon
cg01932247	12	118501232
cg01933329	14	104639768	KIF26A	NM_015656	Body
cg01933477	5	2223521
cg01933519	1	65891704	LEPR;LEPR;LEPROT;LEPR	NM_001003680;NM_001003679;NM_017526;NM_002303	5'UTR;5'UTR;Body;5'UTR
cg01934390	5	1298891
cg01935096	11	70391215	SHANK2;SHANK2	NM_012309;NM_133266	Body;Body
cg01936013	4	88839323
cg01936555	6	25931205	SLC17A2	NM_005835	TSS1500
cg01937601	16	89130931
cg01937809	1	37941854	ZC3H12A	NM_025079	Body
cg01937932	16	31380955	ITGAX	NM_000887	Body
cg01939444	22	39101840	GTPBP1;GTPBP1	NM_004286;NM_004286	5'UTR;1stExon
cg01940867	16	431543	TMEM8A;LOC100134368	NM_021259;NR_024453	Body;TSS1500
cg01941027	2	43372366
cg01941755	1	200004582	NR5A2;NR5A2	NM_205860;NM_003822	Body;Body
cg01942971	1	171045267
cg01944484	12	149764	FAM138D	NR_026823	TSS1500
cg01945183	6	31696867	DDAH2	NM_013974	Body
cg01945624	4	8230847	SH3TC1	NM_018986	Body
cg01946510	16	88039257	BANP;BANP	NM_017869;NM_079837	Body;Body
cg01946530	3	173116046	NLGN1	NM_014932	TSS200
cg01947936	11	47470633	RAPSN;RAPSN;RAPSN;RAPSN	NM_005055;NM_005055;NM_032645;NM_032645	1stExon;5'UTR;1stExon;5'UTR
cg01952989	7	1986334	MAD1L1;MAD1L1;MAD1L1	NM_003550;NM_001013837;NM_001013836	Body;Body;Body
cg01953399	13	27706214	USP12	NM_182488	Body
cg01955533	6	36650733	CDKN1A;CDKN1A	NM_000389;NM_078467	5'UTR;5'UTR
cg01957400	16	81477840	CMIP	NM_198390	TSS1500
cg01957760	1	179847329	TOR1AIP2;TOR1AIP2	NM_022347;NM_145034	TSS1500;TSS1500
cg01962597	11	63971396	STIP1	NM_006819	Body
cg01964262	13	97874638	MBNL2;MBNL2;MBNL2;MBNL2	NM_144778;NM_207304;NM_144778;NM_207304	5'UTR;1stExon;1stExon;5'UTR
cg01965874	1	19052204	PAX7;PAX7;PAX7	NM_013945;NM_002584;NM_001135254	Body;Body;Body
cg01965939	5	148442694	SH3TC2;SH3TC2	NM_024577;NM_024577	1stExon;5'UTR
cg01966117	3	52528714	STAB1	NM_015136	TSS1500
cg01968525	11	46575582	AMBRA1	NM_017749	5'UTR
cg01969433	11	46564392	AMBRA1	NM_017749	Body
cg01969759	8	53301169	ST18	NM_014682	5'UTR
cg01970407	5	323320	AHRR	NM_020731	Body
cg01971363	7	150768318	SLC4A2	NM_003040	Body
cg01971880	12	34474637
cg01974660	2	240056337	HDAC4	NM_006037	Body
cg01975510	11	67017821	KDM2A;KDM2A	NR_027473;NM_012308	Body;Body
cg01975786	8	142428968
cg01977798	1	2886792
cg01977863	17	79167836	AZI1;AZI1	NM_014984;NM_001009811	Body;Body
cg01983248	5	43482804	C5orf28	NM_022483	5'UTR
cg01984656	17	80212821	CSNK1D;CSNK1D	NM_001893;NM_139062	Body;Body
cg01985833	12	108169928	ASCL4;ASCL4	NM_203436;NM_203436	1stExon;3'UTR
cg01987362	5	1827066
cg01987417	14	105434159	AHNAK2	NM_138420	Body
cg01988827	12	69864077	FRS2;FRS2	NM_006654;NM_001042555	TSS200;TSS200
cg01990910	16	12207648	SNX29	NM_001080530	Body
cg01991383	11	126139007	FOXRED1;SRPR	NM_017547;NM_003139	TSS200;TSS1500
cg01991582	11	44587154	CD82;CD82;CD82;CD82	NM_002231;NM_001024844;NM_001024844;NM_002231	5'UTR;1stExon;5'UTR;1stExon
cg01991625	16	54404353
cg01991743	6	33053608	HLA-DPB1	NM_002121	Body
cg01994513	15	91260603	BLM;BLM	NM_000057;NM_000057	5'UTR;1stExon
cg01994750	11	95500778
cg01994902	16	1576069	IFT140	NM_014714	Body
cg01996116	3	42846907	HIGD1A;HIGD1A;HIGD1A	NM_014056;NM_001099668;NM_001099669	TSS1500;TSS1500;TSS1500
cg01999566	6	30624449	DHX16;DHX16	NM_001164239;NM_003587	Body;Body
cg01999908	7	127256920	PAX4	NM_006193	TSS1500
cg02002240	5	77864819	LHFPL2	NM_005779	5'UTR
cg02003117	20	48428318	SLC9A8	NM_015266	TSS1500
cg02005847	19	1487605	PCSK4	NM_017573	Body
cg02007567	16	10912696	FAM18A	NM_001079512	TSS200
cg02010342	17	79485934
cg02012159	1	229477078	C1orf96	NM_145257	Body
cg02014107	2	172967979	DLX2	NM_004405	TSS1500
cg02016985	16	4511773	NMRAL1	NM_020677	3'UTR
cg02017323	16	30411471
cg02018277	15	65116255	PIF1	NM_025049	Body
cg02021288	16	11435867
cg02021817	16	53468150	RBL2	NM_005611	TSS200
cg02021919	5	86707074	CCNH	NM_001239	Body
cg02022491	17	2323612	METT10D	NM_024086	Body
cg02027123	16	18804395	ARL6IP1	NM_015161	3'UTR
cg02028423	16	185078	C16orf35;C16orf35	NM_001039476;NM_001077350	5'UTR;Body
cg02030652	11	1412397	BRSK2	NM_003957	Body
cg02031849	8	145620185	CPSF1;MIR939	NM_013291;NR_030635	Body;TSS1500
cg02032488	7	645730	PRKAR1B;PRKAR1B;PRKAR1B;PRKAR1B;PRKAR1B;PRKAR1B	NM_001164759;NM_001164762;NM_001164758;NM_001164760;NM_001164761;NM_002735	Body;Body;Body;Body;Body;Body
cg02033182	16	89337334	ANKRD11	NM_013275	Body
cg02035751	1	206729099	RASSF5;RASSF5;RASSF5	NM_182663;NM_182665;NM_182664	Body;TSS1500;Body
cg02036127	14	19855384
cg02036336	10	102758403	LZTS2	NM_032429	5'UTR
cg02038558	15	77897206
cg02039072	10	26942165	LOC731789	NR_026794	Body
cg02039171	14	23588162	CEBPE	NM_001805	1stExon
cg02041497	7	132300110	PLXNA4	NM_181775	5'UTR
cg02042736	22	50495161
cg02043000	5	1228081	SLC6A18	NM_182632	Body
cg02046532	20	207858	DEFB129	NM_080831	TSS200
cg02046552	8	21914287	EPB49;EPB49;EPB49;EPB49	NM_001114135;NM_001114136;NM_001114139;NM_001114137	TSS1500;5'UTR;5'UTR;5'UTR
cg02048968	5	188824	PLEKHG4B	NM_052909	3'UTR
cg02050181	1	52344849	NRD1;NRD1	NM_002525;NM_001101662	TSS1500;TSS1500
cg02050917	1	2173571	SKI	NM_003036	Body
cg02051290	22	42967981	SERHL2	NM_014509	Body
cg02051805	1	156308598	CCT3;C1orf182;CCT3;CCT3	NM_001008800;NM_144627;NM_001008883;NM_005998	TSS1500;5'UTR;TSS1500;TSS1500
cg02053171	7	74489585	WBSCR16;WBSCR16	NM_030798;NM_030798	5'UTR;1stExon
cg02057134	12	132378066	ULK1	NM_003565	TSS1500
cg02059034	3	32279948	CMTM8	NM_178868	TSS1500
cg02059176	2	44327637
cg02059214	3	108021106	HHLA2	NM_007072	TSS1500
cg02060567	4	84012851	PLAC8;PLAC8	NM_001130716;NM_016619	3'UTR;3'UTR
cg02060732	17	77151206	HRNBP3	NM_001082575	5'UTR
cg02061804	17	32453	DOC2B	NM_003585	TSS1500
cg02064300	1	6053801	NPHP4	NM_015102	TSS1500
cg02065051	20	25674725	ZNF337	NM_015655	5'UTR
cg02066638	16	87943038	CA5A	NM_001739	Body
cg02068015	22	17848581
cg02068169	1	156675562	CRABP2	NM_001878	TSS200
cg02069738	2	15702002	NBAS	NM_015909	TSS1500
cg02070028	11	73661250	DNAJB13	NM_153614	TSS200
cg02070077	6	168199753
cg02071175	2	27805817	ZNF512	NM_032434	TSS200
cg02071267	16	32853952
cg02072376	1	153606637	C1orf77;S100A13;C1orf77	NM_015607;NM_001024210;NM_015607	5'UTR;TSS200;1stExon
cg02072538	10	103326310
cg02073465	15	59904009	GCNT3;GCNT3	NM_004751;NM_004751	1stExon;5'UTR
cg02074956	16	4730657	MGRN1;MGRN1;MGRN1;MGRN1	NM_015246;NM_001142291;NM_001142290;NM_001142289	Body;Body;Body;Body
cg02076629	7	35494118
cg02076869	7	155301917	CNPY1	NM_001103176	5'UTR
cg02077558	16	30092402	PPP4C	NM_002720	Body
cg02077653	14	88851838	SPATA7;SPATA7	NM_018418;NM_001040428	TSS200;TSS200
cg02078710	14	59066094
cg02084118	7	971027	ADAP1	NM_006869	Body
cg02087039	12	95867833	METAP2;METAP2	NM_006838;NM_006838	1stExon;5'UTR
cg02089452	16	89500152	ANKRD11	NM_013275	5'UTR
cg02091066	6	56716681	DST;DST;DST;DST	NM_001144770;NM_001144770;NM_001144771;NM_001144769	5'UTR;1stExon;TSS1500;Body
cg02092708	6	97063714	FHL5;FHL5	NM_020482;NM_001170807	3'UTR;3'UTR
cg02097604	17	17750910	TOM1L2;TOM1L2	NM_001033551;NM_001082968	3'UTR;3'UTR
cg02097890	1	233007486
cg02098313	6	128222378	THEMIS;THEMIS;THEMIS	NM_001164687;NM_001010923;NM_001164685	5'UTR;TSS200;TSS200
cg02098619	1	8689772	RERE;RERE	NM_012102;NM_001042681	Body;Body
cg02099814	1	77748190	AK5;AK5	NM_174858;NM_012093	Body;TSS200
cg02100604	1	180012272	CEP350	NM_014810	Body
cg02103653	5	111504758	EPB41L4A	NM_022140	Body
cg02103935	1	89588811	GBP2	NM_004120	5'UTR
cg02108620	3	42002230	ULK4	NM_017886	5'UTR
cg02109726	3	87040308	VGLL3	NM_016206	TSS200
cg02114084	14	75894209	JDP2;JDP2;JDP2	NM_001135047;NM_001135048;NM_130469	TSS1500;TSS1500;TSS1500
cg02114288	5	3213134
cg02115302	16	27237719	NSMCE1	NM_145080	Body
cg02116225	17	18267416	SHMT1;SHMT1	NM_004169;NM_148918	TSS1500;TSS1500
cg02117924	21	46321585	ITGB2;ITGB2	NM_000211;NM_001127491	Body;Body
cg02119755	16	2589556	PDPK1;PDPK1	NM_031268;NM_002613	Body;Body
cg02122920	6	42883534	PTCRA	NM_138296	TSS200
cg02123280	11	22454233
cg02124957	3	11722354	VGLL4	NM_014667	Body
cg02125910	5	140479983	PCDHB3	NM_018937	TSS1500
cg02127980	9	137252116	RXRA	NM_002957	Body
cg02128365	6	31707511	MSH5;MSH5;MSH5;MSH5	NM_025259;NM_002441;NM_172165;NM_172166	TSS1500;TSS1500;TSS1500;TSS1500
cg02130329	8	108370910	ANGPT1	NM_001146	Body
cg02131853	4	39034637	TMEM156	NM_024943	TSS1500
cg02131967	17	61554106	ACE	NM_000789	TSS1500
cg02132003	17	79849678	ANAPC11;ANAPC11;ANAPC11;ANAPC11;ANAPC11;ANAPC11;ANAPC11;ANAPC11;ANAPC11;ANAPC11;ANAPC11;ANAPC11;ANAPC11;THOC4	NM_001002245;NM_001002245;NM_016476;NM_001002248;NM_001002246;NM_001002244;NM_001002248;NM_001002247;NM_016476;NM_001002249;NM_001002244;NM_001002247;NM_001002246;NM_005782	1stExon;5'UTR;5'UTR;5'UTR;5'UTR;5'UTR;1stExon;5'UTR;1stExon;TSS200;1stExon;1stExon;1stExon;TSS1500
cg02132058	3	170451961
cg02132284	17	15686473
cg02132458	4	57333267	SRP72	NM_006947	TSS1500
cg02133234	8	144922496	NRBP2	NM_178564	5'UTR
cg02135859	2	239140634	LOC643387;LOC151174;LOC151174	NR_026923;NR_026925;NR_026926	Body;TSS1500;TSS1500
cg02136690	13	114905809
cg02137183	7	141250424	AGK	NM_018238	TSS1500
cg02143936	11	12284949	MICAL2	NM_014632	3'UTR
cg02144518	14	101313690	MEG3;MEG3;MEG3	NR_003531;NR_003530;NR_002766	Body;Body;Body
cg02144924	22	45244265	ARHGAP8;PRR5-ARHGAP8;ARHGAP8	NM_181335;NM_181334;NM_001017526	Body;Body;Body
cg02144954	17	72439205	GPRC5C;GPRC5C	NM_018653;NM_022036	Body;Body
cg02145102	6	31276418
cg02145411	1	110528025	AHCYL1	NM_006621	Body
cg02145701	16	88038949	BANP;BANP	NM_017869;NM_079837	Body;Body
cg02146079	5	140724204	PCDHGA2;PCDHGA3;PCDHGA3;PCDHGA1	NM_018915;NM_018916;NM_032011;NM_018912	Body;1stExon;1stExon;Body
cg02147194	5	141081145
cg02147981	6	131457146
cg02148034	14	54430529
cg02150018	12	56781267
cg02150767	2	95536219	TEKT4	NM_144705	TSS1500
cg02151752	6	32798417	TAP2;TAP2	NM_000544;NM_018833	Body;Body
cg02152233	1	29189789	OPRD1	NM_000911	Body
cg02152265	19	17324656	USE1	NM_018467	TSS1500
cg02154269	4	4228637	OTOP1	NM_177998	TSS200
cg02155543	12	2920369	ITFG2	NM_018463	TSS1500
cg02156723	1	12100631
cg02157463	16	87648182	JPH3	NM_020655	Body
cg02159094	8	140744338	TRAPPC9;TRAPPC9	NM_001160372;NM_031466	Body;Body
cg02159271	6	35226260	ZNF76	NM_003427	TSS1500
cg02159643	16	2816725	SRRM2	NM_016333	Body
cg02162339	2	242648711	ING5	NM_032329	Body
cg02164574	2	176985592
cg02165330	11	124542984	SIAE;SPA17	NM_170601;NM_017425	Body;TSS1500
cg02165713	22	37447630	KCTD17	NM_024681	TSS200
cg02167149	8	10683167	MIR1322;PINX1	NR_031711;NM_017884	TSS1500;Body
cg02168723	13	100258760	CLYBL	NM_206808	TSS200
cg02169279	8	22733261	PEBP4	NM_144962	Body
cg02170310	1	203296207
cg02173268	20	62710948	RGS19;RGS19;OPRL1;OPRL1	NM_001039467;NM_005873;NM_000913;NM_182647	5'UTR;TSS200;TSS1500;TSS1500
cg02173455	7	6770940
cg02175033	14	70098523	KIAA0247	NM_014734	5'UTR
cg02180189	11	2710486	KCNQ1;KCNQ1OT1;KCNQ1	NM_000218;NR_002728;NM_181798	Body;Body;Body
cg02182114	7	139876578	LOC100134229;JHDM1D	NR_024451;NM_030647	TSS1500;1stExon
cg02182656	6	32029206	TNXB	NM_019105	Body
cg02183531	2	62113199	CCT4	NM_006430	Body
cg02184246	11	18656167	SPTY2D1	NM_194285	TSS200
cg02184918	16	75269222	BCAR1;BCAR1;BCAR1;BCAR1;BCAR1;BCAR1;BCAR1;BCAR1;BCAR1	NM_001170718;NM_001170719;NM_001170721;NM_001170715;NM_001170720;NM_014567;NM_001170714;NM_001170716;NM_001170717	Body;Body;Body;Body;Body;Body;Body;Body;Body
cg02189017	7	158933456	VIPR2	NM_003382	Body
cg02190572	10	74057806
cg02190746	10	5708765	ASB13;ASB13	NR_024581;NM_024701	TSS1500;TSS1500
cg02192673	4	72897565	NPFFR2;NPFFR2	NM_004885;NM_004885	1stExon;5'UTR
cg02193461	7	128510318
cg02194129	14	104171313	XRCC3;XRCC3;XRCC3	NM_001100119;NM_005432;NM_001100118	Body;Body;Body
cg02194398	4	142556368	IL15;IL15	NM_172174;NM_000585	TSS1500;TSS1500
cg02194617	7	91808598
cg02197918	13	103249205	TPP2	NM_003291	TSS200
cg02198988	5	134661102
cg02202246	10	134225218	PWWP2B;PWWP2B	NM_138499;NM_001098637	3'UTR;Body
cg02203224	12	123464087	ARL6IP4;ARL6IP4;OGFOD2;ARL6IP4;ARL6IP4	NM_018694;NM_001002251;NM_024623;NM_016638;NM_001002252	TSS1500;TSS1500;3'UTR;TSS1500;TSS1500
cg02203635	7	2597979	IQCE;IQCE	NM_001100390;NM_152558	TSS1500;TSS1500
cg02204630	2	232394896	NMUR1	NM_006056	Body
cg02205072	3	126328430	TXNRD3IT1	NM_001039783	TSS1500
cg02206636	2	73612757	ALMS1	NM_015120	TSS200
cg02208270	13	46287777	SPERT	NM_152719	Body
cg02210123	14	63670835	RHOJ	NM_020663	TSS1500
cg02210967	7	5572794
cg02211519	11	2407267	CD81	NM_004356	Body
cg02211741	11	46383924	DGKZ;DGKZ;DGKZ;DGKZ	NM_201533;NM_001105540;NM_003646;NM_201532	Body;5'UTR;Body;Body
cg02212836	6	6589075	LY86;LOC285780	NM_004271;NR_026970	1stExon;Body
cg02213581	3	50388192	TUSC4;CYB561D2;TUSC4	NM_006545;NM_007022;NM_006545	5'UTR;TSS200;1stExon
cg02213678	16	85112535	KIAA0513	NM_014732	Body
cg02215171	4	89379156	HERC5	NM_016323	Body
cg02217184	13	99907419	GPR18;GPR18;UBAC2;UBAC2;UBAC2	NM_001098200;NM_005292;NM_001144072;NM_177967;NR_026644	Body;Body;Body;Body;Body
cg02218134	14	68162512	RDH11	NM_016026	TSS200
cg02219026	3	48282209	ZNF589	NM_016089	TSS1500
cg02219197	2	128175300	PROC	NM_000312	TSS1500
cg02220125	17	76164117	SYNGR2	NM_004710	TSS1500
cg02220755	2	136288843	R3HDM1;ZRANB3	NM_015361;NM_032143	TSS1500;TSS200
cg02221520	4	38859706	TLR6	NM_006068	TSS1500
cg02224864	11	132934554	OPCML	NM_001012393	Body
cg02225143	3	51422103	MANF	NM_006010	TSS1500
cg02225847	16	67563418	FAM65A	NM_024519	5'UTR
cg02226939	17	28619481	BLMH	NM_000386	TSS1500
cg02227867	8	22457446	C8orf58	NM_001013842	Body
cg02228037	12	8543333	LOC389634	NR_024420	Body
cg02230180	1	245025960	HNRNPU;HNRNPU	NM_004501;NM_031844	Body;Body
cg02231062	22	42321087	TNFRSF13C	NM_052945	3'UTR
cg02231590	2	231737958	ITM2C;ITM2C;ITM2C	NM_001012516;NM_030926;NM_001012514	Body;Body;Body
cg02234489	17	71547421	SDK2	NM_001144952	Body
cg02236134	2	64752073	AFTPH;AFTPH;AFTPH	NM_203437;NM_001002243;NM_017657	5'UTR;5'UTR;5'UTR
cg02236949	11	68972906
cg02237172	3	50380958	ZMYND10	NM_015896	Body
cg02239586	20	62678536
cg02241160	17	79801507	P4HB	NM_000918	3'UTR
cg02241241	21	43639091	ABCG1;ABCG1;ABCG1;ABCG1;ABCG1;ABCG1	NM_207174;NM_016818;NM_207628;NM_207627;NM_207629;NM_004915	TSS1500;TSS200;5'UTR;Body;Body;TSS200
cg02242372	8	119963842	TNFRSF11B	NM_002546	Body
cg02244292	4	183057452
cg02246876	14	23586582	CEBPE	NM_001805	3'UTR
cg02247300	8	144521435	ZC3H3	NM_015117	Body
cg02247898	14	55033728	SAMD4A;SAMD4A	NM_015589;NM_001161576	TSS1500;TSS1500
cg02249030	6	99961954	USP45	NM_001080481	5'UTR
cg02250787	13	47470989	HTR2A;HTR2A;HTR2A;HTR2A	NM_001165947;NM_000621;NM_000621;NM_001165947	1stExon;1stExon;5'UTR;5'UTR
cg02251243	2	74210857
cg02251663	11	14281053	SPON1	NM_006108	Body
cg02251850	17	78851503	RPTOR;RPTOR	NM_001163034;NM_020761	Body;Body
cg02253142	15	52048211	TMOD2;TMOD2	NM_014548;NM_001142885	5'UTR;5'UTR
cg02254056	6	7911480	TXNDC5;TXNDC5	NM_030810;NM_001145549	TSS1500;TSS1500
cg02255184	3	51422832	MANF	NM_006010	1stExon
cg02257708	7	98989843	ARPC1B	NM_005720	Body
cg02257712	5	150080478	RBM22	NM_018047	Body
cg02259914	20	3693221
cg02262633	17	805469	NXN	NM_022463	Body
cg02264195	16	3724381	TRAP1	NM_016292	Body
cg02270952	7	97952898	BAIAP2L1	NM_018842	Body
cg02271790	6	10381196
cg02274103	17	78078650	GAA;GAA;GAA	NM_001079804;NM_000152;NM_001079803	Body;Body;Body
cg02274500	22	31064092	DUSP18	NM_152511	TSS1500
cg02275243	1	5920514
cg02275294	1	179262462	SOAT1	NM_003101	TSS1500
cg02275989	6	123110863	SMPDL3A	NM_006714	Body
cg02276807	12	133022677
cg02276845	11	3876248	STIM1	NM_003156	TSS1500
cg02277326	15	28357447	HERC2	NM_004667	Body
cg02277487	2	70781256	TGFA;TGFA	NM_003236;NM_001099691	TSS200;TSS200
cg02277530	17	75396462	SEPT9;SEPT9;SEPT9;SEPT9;SEPT9	NM_001113494;NM_001113492;NM_001113493;NM_001113491;NM_006640	5'UTR;5'UTR;Body;Body;Body
cg02278697	12	129308719	SLC15A4	NM_145648	TSS200
cg02279224	6	144386160	PLAGL1;PLAGL1	NM_001080955;NM_001080951	TSS1500;TSS1500
cg02280023	12	68726324	MDM1;MDM1	NM_017440;NM_020128	TSS200;TSS200
cg02280281	2	119593949
cg02284900	19	5852498	FUT3;FUT3;FUT3;FUT3	NM_001097640;NM_001097639;NM_000149;NM_001097641	TSS1500;TSS1500;TSS1500;TSS1500
cg02286380	17	4621205	ARRB2;ARRB2	NM_004313;NM_199004	Body;Body
cg02286662	21	43242467	PRDM15;PRDM15	NM_022115;NM_001040424	Body;Body
cg02287693	22	46276479
cg02288770	19	46052863	OPA3;OPA3	NM_025136;NM_001017989	3'UTR;Body
cg02289741	19	39616340	PAK4;PAK4;PAK4;PAK4;PAK4	NM_001014835;NM_001014831;NM_001014834;NM_005884;NM_001014832	TSS200;TSS200;TSS200;TSS200;TSS200
cg02290684	2	239009246	ESPNL	NM_194312	1stExon
cg02292263	2	43634192	THADA;THADA	NM_022065;NM_001083953	Body;Body
cg02293044	22	29703543	GAS2L1;GAS2L1;GAS2L1	NM_152236;NM_006478;NM_152237	5'UTR;5'UTR;5'UTR
cg02295205	2	99758104	C2orf15;TSGA10;TSGA10	NM_144706;NM_182911;NM_025244	TSS200;TSS200;5'UTR
cg02295216	16	66585210	CKLF;CKLF;CKLF;CKLF;TK2;CKLF	NM_181640;NM_016326;NM_001040138;NM_181641;NM_004614;NM_016951	TSS1500;TSS1500;TSS1500;TSS1500;TSS1500;TSS1500
cg02298329	2	232221676
cg02301528	12	12939519	APOLD1;APOLD1	NM_001130415;NM_030817	Body;Body
cg02302089	7	23401203	IGF2BP3	NM_006547	Body
cg02303209	5	32223673
cg02303897	12	53268136
cg02304033	10	129346680	NPS	NM_001030013	TSS1500
cg02304824	1	100943261	CDC14A;CDC14A;CDC14A	NM_003672;NM_033312;NM_033313	Body;Body;Body
cg02305586	13	113121219
cg02305874	17	38083354	ORMDL3	NM_139280	5'UTR
cg02307597	19	17402942	ABHD8	NM_024527	3'UTR
cg02307880	7	101566857	CUX1;CUX1;CUX1	NM_181500;NM_181552;NM_001913	Body;Body;Body
cg02308232	17	7742762	KDM6B	NM_001080424	TSS1500
cg02310296	20	44637358	MMP9	NM_004994	TSS200
cg02311040	5	177305314	LOC728554	NR_003615	Body
cg02311193	17	46660002
cg02311364	3	13001256	IQSEC1;IQSEC1	NM_001134382;NM_014869	Body;Body
cg02315870	7	26236721	HNRNPA2B1;HNRNPA2B1	NM_031243;NM_002137	Body;Body
cg02317313	12	122235206	LOC338799	NR_002809	Body
cg02317832	2	237172964	ASB18	NM_212556	1stExon
cg02319392	16	83841324	HSBP1	NM_001537	TSS1500
cg02322376	2	220071368	ZFAND2B	NM_138802	TSS200
cg02324732	2	219270525	CTDSP1	NM_021198	3'UTR
cg02324835	8	28919075
cg02326566	5	140220686	PCDHA6;PCDHA2;PCDHA1;PCDHA7;PCDHA1;PCDHA8;PCDHA6;PCDHA5;PCDHA8;PCDHA3;PCDHA4	NM_031849;NM_018905;NM_031411;NM_018910;NM_018900;NM_018911;NM_018909;NM_018908;NM_031856;NM_018906;NM_018907	Body;Body;Body;Body;Body;TSS1500;Body;Body;TSS1500;Body;Body
cg02327001	4	101972762	PPP3CA;PPP3CA;PPP3CA	NM_001130691;NM_000944;NM_001130692	Body;Body;Body
[truncated: 18,690 more rows]
