# Supplementary material for: Network Analysis of the Potential Role of DNA Methylation in the Relationship between Plasma Carotenoids and Lipid Profile
Source: MDPI journal article supplement (doi:10.3390/nu11061265), 2019-06-04
Supplement: s1 [file Supplementary Table 3. Hub genes allv2.xlsx]

## Sheet: geneInfo_Generation_Dynamic_MEg
Supplementary Table S3. Hub genes identified from WGCNA analysis (n=2734)
Module- trait	CpG	Gene	Accession	GS	P-value GS	MM	P-value MM
Black module - HDL-C	cg01999908	PAX4	NM_006193	-0.372127	0.0092013	0.850137	2.1e-14
	cg08731068	TBC1D16	NM_019020	-0.36501	0.0107449	0.892251	1.7e-17
	cg04010296	PGA5	NM_014224	-0.362923	0.0112379	0.827583	4.08e-13
	cg09648809	SLC6A19	NM_001003841	-0.362235	0.0114044	0.821202	8.75e-13
	cg25744355	MAD1L1;MAD1L1;MAD1L1	NM_003550;NM_001013837;NM_001013836	-0.355733	0.0130873	0.919332	2.95e-20
	cg09142135	TCIRG1;TCIRG1	NM_006053;NM_006019	-0.340944	0.0177208	0.919768	2.62e-20
	cg24208325	ODZ4	NM_001098816	-0.340417	0.0179087	0.854923	1.05e-14
	cg14973408	SGCD;SGCD;SGCD	NM_001128209;NM_172244;NM_000337	-0.334494	0.0201398	0.927833	2.5e-21
	cg13146020	CADPS2;CADPS2;CADPS2;RNF133	NM_001009571;NM_001167940;NM_017954;NM_139175	-0.334136	0.0202817	0.918997	3.23e-20
	cg12565502	SPHKAP;SPHKAP	NM_001142644;NM_030623	-0.328248	0.0227419	0.846517	3.49e-14
	cg25220985			-0.327914	0.0228891	0.934896	2.52e-22
	cg00564212	LTBP4	NM_003573	-0.325039	0.0241855	0.909222	3.99e-19
	cg07595943	ADAD2;ADAD2	NM_001145400;NM_139174	-0.306686	0.0339924	0.866321	1.82e-15
	cg27301256			-0.300498	0.0379617	0.865386	2.11e-15
	cg24630201			0.302305	0.0367653	-0.871118	8.28e-16
	cg16850254	ARHGEF4;ARHGEF4	NM_032995;NM_015320	0.324694	0.0243449	-0.85003	2.13e-14
	cg18720113			0.349317	0.0149515	-0.811795	2.55e-12
Turquoise module -TC	cg00000029	RBL2	NM_005611	-0.59418	8.49e-06	0.828947	3.45e-13
	cg02500883	GRIN3A;PPP3R2;PPP3R2	NM_133445;NM_147180;NM_147180	-0.574214	1.98e-05	0.811912	2.52e-12
	cg00864012	TEX2	NM_018469	-0.560734	3.39e-05	0.84923	2.39e-14
	cg06142108	SYT17	NM_016524	-0.556654	3.98e-05	0.880076	1.75e-16
	cg11942936			-0.545965	5.98e-05	0.838312	1.05e-13
	cg24197477	TMEM183B;TMEM183A	NM_001079809;NM_138391	-0.542319	6.84e-05	0.899845	3.45e-18
	cg11081833	LGALS2;LGALS2	NM_006498;NM_006498	-0.529722	0.000108045	0.86412	2.58e-15
	cg01280180	TXNDC6	NM_178130	-0.521866	0.00014235	0.841085	7.3e-14
	cg03782662	TRIM26	NM_003449	-0.51921	0.000156022	0.81151	2.64e-12
	cg09178384	SH3RF1	NM_020870	-0.517959	0.000162871	0.861852	3.68e-15
	cg02119755	PDPK1;PDPK1	NM_031268;NM_002613	-0.51581	0.000175264	0.867041	1.62e-15
	cg07052627	MDK;DGKZ;DGKZ;DGKZ;DGKZ	NM_001012334;NM_001105540;NM_201533;NM_003646;NM_201532	-0.514407	0.000183816	0.831196	2.61e-13
	cg07665923	C7orf50;C7orf50;C7orf50	NM_001134396;NM_032350;NM_001134395	-0.509407	0.00021746	0.832487	2.22e-13
	cg09273716			-0.508572	0.000223598	0.903076	1.68e-18
	cg17416793	KCNQ1;KCNQ1	NM_000218;NM_181798	-0.507355	0.000232814	0.870338	9.43e-16
	cg21599336	LOC100128239	NR_027276	-0.501278	0.000284237	0.886669	5.12e-17
	cg01211097	USP10	NM_005153	-0.500073	0.000295576	0.84223	6.26e-14
	cg04582136	TRAK1;TRAK1	NM_001042646;NM_014965	-0.499009	0.000305935	0.848071	2.81e-14
	cg02194129	XRCC3;XRCC3;XRCC3	NM_001100119;NM_005432;NM_001100118	-0.496906	0.000327373	0.898727	4.4e-18
	cg14754427	DERA	NM_015954	-0.496212	0.000334733	0.91503	9.29e-20
	cg15721134			-0.494631	0.000352077	0.820755	9.22e-13
	cg24586978	DOCK9;DOCK9;DOCK9;DOCK9	NM_015296;NM_001130050;NM_001130049;NM_001130048	-0.49439	0.000354791	0.872187	6.92e-16
	cg17053201	GABBR1;GABBR1;GABBR1	NM_021904;NM_021903;NM_001470	-0.490486	0.000401473	0.821553	8.4e-13
	cg26023268	CPSF4L	NM_001129885	-0.489664	0.000411987	0.817242	1.38e-12
	cg18809074	FAR2	NM_018099	-0.489397	0.000415448	0.814203	1.95e-12
	cg07840332			-0.488192	0.000431425	0.827519	4.11e-13
	cg24840601	SUMF1;SUMF1;SUMF1	NM_001164675;NM_182760;NM_001164674	-0.486745	0.000451346	0.811374	2.68e-12
	cg17327067	PLEC1;PLEC1;PLEC1;PLEC1	NM_000445;NM_201378;NM_201379;NM_201380	-0.485821	0.000464486	0.852121	1.58e-14
	cg13333374	ACSL5	NM_203379	-0.485249	0.000472794	0.854601	1.1e-14
	cg21271945	PRKCZ;PRKCZ;PRKCZ	NM_001033581;NM_001033582;NM_002744	-0.482254	0.000518537	0.871809	7.37e-16
	cg11220060	KLF1	NM_006563	-0.48221	0.000519236	0.884662	7.49e-17
	cg07349663	COPA;COPA	NM_004371;NM_001098398	-0.481776	0.0005262	0.94232	1.69e-23
	cg19737225	ANKLE1	NM_152363	-0.481556	0.000529751	0.826944	4.41e-13
	cg09676669	AQP1	NM_198098	-0.481361	0.000532926	0.873536	5.5e-16
	cg22594985			-0.480844	0.000541415	0.805317	5.16e-12
	cg09910856	ARHGAP10	NM_024605	-0.480697	0.000543864	0.807199	4.22e-12
	cg02237172	ZMYND10	NM_015896	-0.48046	0.000547812	0.822012	7.96e-13
	cg03411376	TRPM5	NM_014555	-0.478836	0.000575587	0.807596	4.04e-12
	cg22092521	CFD	NM_001928	-0.478788	0.000576419	0.909638	3.61e-19
	cg16347155	NAGLU	NM_000263	-0.478638	0.000579047	0.894264	1.13e-17
	cg27020966			-0.477723	0.000595338	0.921946	1.42e-20
	cg10380312	ARHGEF7;ARHGEF7;ARHGEF7;ARHGEF7;ARHGEF7	NM_001113511;NM_001113513;NM_003899;NM_001113512;NM_145735	-0.476776	0.000612625	0.820639	9.35e-13
	cg00605777	SEMA4C	NM_017789	-0.476473	0.000618251	0.898822	4.31e-18
	cg00805360	ADAM8;ADAM8;ADAM8	NM_001109;NM_001164489;NM_001164490	-0.475912	0.000628789	0.801222	7.94e-12
	cg03707168	PPP1R15A	NM_014330	-0.475438	0.00063782	0.860672	4.42e-15
	cg03258139	SMARCA2;SMARCA2	NM_003070;NM_139045	-0.475154	0.000643301	0.853792	1.24e-14
	cg25723459	ST3GAL4	NM_006278	-0.475101	0.000644311	0.900936	2.72e-18
	cg00163365	COQ2	NM_015697	-0.474574	0.000654584	0.834043	1.83e-13
	cg05674199	AHCY;AHCY	NM_001161766;NM_000687	-0.474112	0.000663709	0.849502	2.3e-14
	cg00657780			-0.473851	0.000668914	0.890166	2.59e-17
	cg02516189	CARD9;CARD9;CARD9;CARD9	NM_052813;NM_052813;NM_052814;NM_052814	-0.473588	0.000674201	0.832791	2.14e-13
	cg08597292	GABRR2	NM_002043	-0.472838	0.000689477	0.811167	2.74e-12
	cg19186056			-0.471977	0.000707391	0.882077	1.21e-16
	cg07773434	PPP1R14B	NM_138689	-0.471298	0.000721811	0.894808	1.01e-17
	cg05654163	SLC39A2;SLC39A2	NM_014579;NM_014579	-0.471288	0.000722027	0.853377	1.32e-14
	cg00083659	C22orf33;C22orf33	NM_178552;NM_001163857	-0.470118	0.000747482	0.835676	1.48e-13
	cg13670898			-0.469788	0.000754821	0.824369	6.02e-13
	cg00211174	MCM2	NM_004526	-0.469507	0.000761117	0.916245	6.76e-20
	cg06067425			-0.469153	0.000769103	0.838901	9.74e-14
	cg01445659	MRPL34;ABHD8	NM_023937;NM_024527	-0.468955	0.00077361	0.916835	5.78e-20
	cg18064468			-0.468811	0.000776893	0.840462	7.93e-14
	cg00524900	TNFAIP8	NM_001077654	-0.468718	0.000779024	0.925619	4.89e-21
	cg19925518			-0.468674	0.000780041	0.842791	5.8e-14
	cg23434428	PRKCQ	NM_006257	-0.468204	0.000790908	0.911316	2.39e-19
	cg24964103	VNN1	NM_004666	-0.467779	0.000800858	0.878836	2.18e-16
	cg13393678			-0.467122	0.000816434	0.851119	1.82e-14
	cg16897608	GLIS1	NM_147193	-0.466665	0.000827437	0.851282	1.78e-14
	cg25199536	CCDC21	NM_022778	-0.465359	0.000859639	0.918753	3.45e-20
	cg08209473	SIAH1;SIAH1;SIAH1	NM_001006610;NM_001006610;NM_003031	-0.465293	0.000861291	0.819405	1.08e-12
	cg11919336	GPR109A	NM_177551	-0.465161	0.000864607	0.908941	4.27e-19
	cg15602972	DACT3	NM_145056	-0.465099	0.000866166	0.880593	1.59e-16
	cg23917868	MIR145;LOC728264	NR_029686;NR_027180	-0.463966	0.000895176	0.848653	2.59e-14
	cg06991495	CSNK1E;CSNK1E	NM_001894;NM_152221	-0.463916	0.000896492	0.91688	5.72e-20
	cg25758828	PAX8;PAX8;PAX8;PAX8;PAX8;LOC440839	NM_013953;NM_003466;NM_013952;NM_013951;NM_013992;NR_029399	-0.463738	0.000901139	0.875093	4.21e-16
	cg20708305	CPNE9	NM_153635	-0.463328	0.000911898	0.819731	1.04e-12
	cg09315264	STK40	NM_032017	-0.463075	0.000918617	0.883617	9.11e-17
	cg07875121	PFDN1	NM_002622	-0.461085	0.000972945	0.835274	1.56e-13
	cg09106999	CDK2;SILV;CDK2	NM_001798;NM_006928;NM_052827	-0.460511	0.000989128	0.925216	5.51e-21
	cg02667291	C19orf22	NM_138774	-0.458867	0.00103687	0.899742	3.53e-18
	cg10142237	CSNK1E;CSNK1E	NM_001894;NM_152221	-0.457811	0.0010686	0.93387	3.58e-22
	cg07119973	DCAKD;DCAKD	NM_001128631;NM_024819	-0.457757	0.00107025	0.84737	3.1e-14
	cg23752007	ELMO1	NM_014800	-0.457535	0.00107703	0.815895	1.61e-12
	cg01486260	ITGAX	NM_000887	-0.456489	0.00110954	0.837756	1.13e-13
	cg18855195	RIBC2	NM_015653	-0.456209	0.00111841	0.866248	1.84e-15
	cg23598378	C6orf132	NM_001164446	-0.455417	0.00114379	0.881183	1.43e-16
	cg21671607	RAG2;C11orf74	NM_000536;NM_138787	-0.45522	0.00115017	0.84103	7.35e-14
	cg05126095	AQP2	NM_000486	-0.455067	0.00115515	0.897863	5.3e-18
	cg05292082	TIAM1	NM_003253	-0.455039	0.00115607	0.886756	5.03e-17
	cg23560388	TIAM2;TIAM2	NM_012454;NM_001010927	-0.454999	0.00115738	0.811811	2.55e-12
	cg25199005	SMYD3;SMYD3	NM_022743;NM_001167740	-0.454308	0.0011802	0.912896	1.61e-19
	cg03029090	LIPC	NM_000236	-0.454112	0.00118671	0.861814	3.71e-15
	cg07175301	IGSF9;IGSF9	NM_020789;NM_001135050	-0.453919	0.00119321	0.811276	2.7e-12
	cg01206723			-0.453704	0.00120045	0.880968	1.48e-16
	cg15210526	MPZL1;MPZL1;MPZL1	NM_001146191;NM_003953;NM_024569	-0.453565	0.00120516	0.895407	8.91e-18
	cg24043628			-0.45302	0.00122376	0.836445	1.34e-13
	cg12694124	TSC22D1	NM_183422	-0.452847	0.00122971	0.80738	4.14e-12
	cg23926866			-0.452777	0.00123214	0.820582	9.41e-13
	cg17069873	CNTD2	NM_024877	-0.452675	0.00123568	0.915175	8.95e-20
	cg18642459			-0.452409	0.00124492	0.811195	2.73e-12
	cg12262372	NFIA	NM_001145511	-0.451829	0.00126532	0.817262	1.38e-12
	cg16598508			-0.451381	0.00128127	0.918619	3.58e-20
	cg15773890			-0.451326	0.00128326	0.879933	1.79e-16
	cg19342782	HHLA3;ANKRD13C;HHLA3;HHLA3;HHLA3	NM_001036646;NM_030816;NR_027404;NM_001031693;NM_001036645	-0.450891	0.00129895	0.907223	6.44e-19
	cg14787269			-0.450375	0.00131777	0.930013	1.26e-21
	cg09849688	ARID1A;ARID1A	NM_006015;NM_139135	-0.449865	0.00133663	0.864284	2.52e-15
	cg07456681	NTAN1	NM_173474	-0.4498	0.00133905	0.927197	3.04e-21
	cg01905773	TMEM105	NM_178520	-0.449555	0.00134818	0.884497	7.73e-17
	cg09695851			-0.449471	0.00135136	0.893075	1.44e-17
	cg25049733	GMDS	NM_001500	-0.448885	0.00137352	0.812495	2.36e-12
	cg00204748	FAR2;FAR2	NM_018099;NM_018099	-0.448548	0.00138642	0.929947	1.29e-21
	cg16277071			-0.448182	0.00140053	0.881871	1.26e-16
	cg19219366	TRIM3;TRIM3	NM_006458;NM_033278	-0.448002	0.00140752	0.838967	9.66e-14
	cg19700872	GPR151	NM_194251	-0.447417	0.00143048	0.847387	3.09e-14
	cg16684817	C1orf38;C1orf38;C1orf38	NM_001105556;NM_001039477;NM_004848	-0.447381	0.0014319	0.896798	6.65e-18
	cg23251798			-0.447353	0.00143304	0.842539	6.01e-14
	cg24085232			-0.446992	0.00144737	0.885336	6.6e-17
	cg07461572			-0.446708	0.00145874	0.833308	2e-13
	cg25725418			-0.446667	0.00146041	0.864206	2.55e-15
	cg10420527	LRP5	NM_002335	-0.446638	0.00146157	0.911118	2.51e-19
	cg02246876	CEBPE	NM_001805	-0.446589	0.00146354	0.855838	9.17e-15
	cg05985135			-0.446159	0.00148095	0.853107	1.37e-14
	cg24240870	GOSR1;GOSR1;GOSR1	NM_004871;NM_001007024;NM_001007025	-0.445999	0.0014875	0.806499	4.55e-12
	cg15920906	CUX2	NM_015267	-0.44557	0.00150513	0.890539	2.4e-17
	cg22284058	SLC45A4	NM_001080431	-0.444754	0.00153922	0.845962	3.77e-14
	cg26161997			-0.444642	0.00154394	0.879518	1.93e-16
	cg26921611	EIF4EBP1	NM_004095	-0.444393	0.00155452	0.824118	6.2e-13
	cg07654588	TBC1D5;TBC1D5;TBC1D5	NM_014744;NM_014744;NM_001134380	-0.444392	0.00155455	0.813547	2.1e-12
	cg06394460	LNX2	NM_153371	-0.444353	0.00155621	0.825886	5.01e-13
	cg04459545	USHBP1	NM_031941	-0.443698	0.00158435	0.893003	1.46e-17
	cg06987053	CA5A	NM_001739	-0.443446	0.00159527	0.923248	9.8e-21
	cg22396850	AARSD1;AARSD1;AARSD1;AARSD1	NM_001142653;NM_025267;NM_001142654;NM_001136042	-0.443401	0.00159723	0.944383	7.48e-24
	cg26686150			-0.44255	0.00163474	0.907406	6.17e-19
	cg16097041	FLAD1;LENEP;FLAD1	NM_025207;NM_018655;NM_201398	-0.44244	0.00163963	0.930578	1.05e-21
	cg18828619	PELI2	NM_021255	-0.442257	0.00164781	0.917002	5.53e-20
	cg22996742			-0.442031	0.00165797	0.805261	5.19e-12
	cg00543769			-0.441843	0.00166646	0.855763	9.28e-15
	cg12798040	XRCC3;XRCC3;XRCC3	NM_001100119;NM_005432;NM_001100118	-0.441583	0.00167829	0.820585	9.41e-13
	cg13617561	CABP4	NM_145200	-0.441352	0.00168884	0.837744	1.13e-13
	cg02769743	TMEM201	NM_001130924	-0.44104	0.00170319	0.926509	3.74e-21
	cg05255811	KCNK5	NM_003740	-0.44079	0.00171476	0.918717	3.49e-20
	cg17631451	TREX1;TREX1;TREX1;TREX1	NM_033629;NM_016381;NM_033629;NM_016381	-0.440775	0.00171542	0.811331	2.69e-12
	cg01880929	CRIM1	NM_016441	-0.44036	0.00173481	0.876856	3.1e-16
	cg26449680	CSNK1E;CSNK1E	NM_001894;NM_152221	-0.440207	0.00174199	0.895361	8.99e-18
	cg01765641	TBC1D5;TBC1D5;TBC1D5	NM_014744;NM_014744;NM_001134380	-0.440092	0.00174745	0.832422	2.24e-13
	cg12707346			-0.440008	0.00175141	0.910505	2.92e-19
	cg18770579	C19orf76;PRMT1;PRMT1;PRMT1	NM_001101340;NM_198318;NM_198319;NM_001536	-0.439113	0.00179419	0.809184	3.4e-12
	cg23111655	CAPZB	NM_004930	-0.438952	0.001802	0.8181	1.25e-12
	cg23713742	SPAG4	NM_003116	-0.438728	0.00181287	0.930376	1.13e-21
	cg04638014	ARL9	NM_206919	-0.438584	0.00181994	0.905076	1.06e-18
	cg07563400	ADORA2B	NM_000676	-0.438377	0.00183009	0.830082	3e-13
	cg02481256	LPPR2;LPPR2	NM_001170635;NM_022737	-0.438249	0.0018364	0.853865	1.23e-14
	cg06419601			-0.438105	0.00184352	0.875297	4.07e-16
	cg20668765			-0.437561	0.00187064	0.86331	2.93e-15
	cg00127487			-0.437498	0.00187379	0.87681	3.12e-16
	cg25521400	B3GNT2	NM_006577	-0.437261	0.00188576	0.936406	1.5e-22
	cg13741304	ARRDC1	NM_152285	-0.436732	0.00191264	0.93789	8.83e-23
	cg02307597	ABHD8	NM_024527	-0.436729	0.00191277	0.837101	1.23e-13
	cg18659081	PARVG;PARVG;PARVG	NM_001137606;NM_001137605;NM_022141	-0.436375	0.001931	0.945945	3.95e-24
	cg25021247	AMT;AMT;AMT;AMT;NICN1;AMT	NR_028435;NM_001164711;NM_000481;NM_001164710;NM_032316;NM_001164712	-0.436254	0.00193721	0.906593	7.47e-19
	cg09419900	PSTK	NM_153336	-0.435911	0.00195505	0.825588	5.2e-13
	cg27366162	ARSG	NM_014960	-0.43573	0.00196452	0.930034	1.26e-21
	cg26542091	UPF1	NM_002911	-0.435465	0.00197846	0.91141	2.33e-19
	cg08473752	NLK	NM_016231	-0.434962	0.00200513	0.902909	1.75e-18
	cg04466484			-0.434852	0.00201099	0.805096	5.28e-12
	cg00499707			-0.434159	0.00204837	0.835222	1.57e-13
	cg00967073			-0.433962	0.00205913	0.874537	4.64e-16
	cg09578155	LRP5	NM_002335	-0.433794	0.00206832	0.824107	6.21e-13
	cg20633875	KPNA6	NM_012316	-0.433505	0.0020842	0.946104	3.7e-24
	cg20507228	MAN2A2	NM_006122	-0.433272	0.00209712	0.902995	1.71e-18
	cg08130265	C15orf5;SGK269	NR_026813;NM_024776	-0.433111	0.00210606	0.941279	2.52e-23
	cg24275855			-0.432654	0.00213167	0.862979	3.09e-15
	cg24123679	AZU1	NM_001700	-0.432505	0.00214008	0.867631	1.47e-15
	cg07624424	HSPA1L	NM_005527	-0.432451	0.00214314	0.871495	7.77e-16
	cg02842382	HIBADH	NM_152740	-0.432361	0.00214824	0.884655	7.5e-17
	cg18115721	MRPL48	NM_016055	-0.432229	0.00215572	0.89998	3.35e-18
	cg02333960	COX19	NM_001031617	-0.432168	0.0021592	0.804689	5.52e-12
	cg02859319	MAPKAPK3	NM_004635	-0.430948	0.00222968	0.874394	4.75e-16
	cg14131038	NCK2;NCK2	NM_001004722;NM_003581	-0.430568	0.00225206	0.911672	2.18e-19
	cg00253228	PLEC1;PLEC1;PLEC1;PLEC1	NM_000445;NM_201378;NM_201379;NM_201380	-0.430359	0.00226443	0.933655	3.85e-22
	cg13089335	POU2F1	NM_002697	-0.430161	0.00227626	0.869261	1.13e-15
	cg18364120	AMICA1	NM_001098526	-0.430009	0.00228533	0.827244	4.25e-13
	cg18964319			-0.429479	0.00231732	0.901463	2.42e-18
	cg04676766	TIGD4	NM_145720	-0.429263	0.00233041	0.869175	1.14e-15
	cg25119743	CUGBP2;CUGBP2	NM_001025077;NM_006561	-0.429171	0.00233602	0.858368	6.28e-15
	cg04622454	NELF;NELF;NELF;NELF	NM_001130969;NM_015537;NM_001130971;NM_001130970	-0.428679	0.0023663	0.908426	4.83e-19
	cg11305121	RALB	NM_002881	-0.428132	0.00240028	0.872909	6.12e-16
	cg23299218	DIAPH3	NM_001042517	-0.42805	0.00240541	0.873635	5.41e-16
	cg14700707	NOTCH4;NOTCH4	NM_004557;NM_004557	-0.427821	0.0024198	0.923607	8.83e-21
	cg13522406	PPP1R10	NM_002714	-0.427601	0.00243373	0.846985	3.27e-14
	cg10767665	KCNN4	NM_002250	-0.427415	0.00244554	0.87288	6.15e-16
	cg03962451	GLS	NM_014905	-0.427223	0.00245773	0.910361	3.02e-19
	cg18410271	ARHGAP27;ARHGAP27	NM_199282;NM_001159330	-0.427218	0.0024581	0.880698	1.56e-16
	cg03313447	CCDC97	NM_052848	-0.427207	0.0024588	0.896571	6.97e-18
	cg24740647			-0.426499	0.00250437	0.867159	1.59e-15
	cg22290528	HEXA;C15orf34	NM_000520;NR_027262	-0.426421	0.00250945	0.84125	7.14e-14
	cg12806353	PLA1A	NM_015900	-0.426247	0.0025208	0.936155	1.63e-22
	cg14276125	ADRBK1	NM_001619	-0.426206	0.00252348	0.93396	3.47e-22
	cg03437540	PRR5;PRR5-ARHGAP8;PRR5;PRR5;PRR5;PRR5	NM_001017529;NM_181334;NM_001017530;NM_001017528;NM_015366;NM_181333	-0.426191	0.00252446	0.918303	3.9e-20
	cg03068319	FAM8A1	NM_016255	-0.426146	0.00252743	0.834734	1.67e-13
	cg07682160	UPF1	NM_002911	-0.426069	0.00253246	0.877537	2.75e-16
	cg17496921	TSPAN16	NM_012466	-0.425996	0.00253725	0.942425	1.62e-23
	cg04118119	ESD	NM_001984	-0.425952	0.00254018	0.938355	7.47e-23
	cg00214688	ITGB1;ITGB1;ITGB1;ITGB1;ITGB1;ITGB1	NM_033668;NM_133376;NM_002211;NM_033667;NM_033669;NM_033666	-0.425925	0.00254193	0.803906	5.99e-12
	cg14222432	FAR2	NM_018099	-0.425789	0.00255091	0.866276	1.83e-15
	cg23857896			-0.425351	0.00257997	0.815529	1.68e-12
	cg12593793			-0.425257	0.00258625	0.897467	5.77e-18
	cg03452168	RAG2;C11orf74	NM_000536;NM_138787	-0.425109	0.00259613	0.879359	1.99e-16
	cg20640261	MSH5;MSH5;MSH5;MSH5	NM_025259;NM_002441;NM_172165;NM_172166	-0.425079	0.00259816	0.857437	7.23e-15
	cg21610839	UBE2E1;UBE2E1	NM_003341;NM_182666	-0.42496	0.00260617	0.807146	4.24e-12
	cg07283804	SERGEF	NM_012139	-0.42481	0.00261629	0.804599	5.57e-12
	cg07026107	TEC	NM_003215	-0.424722	0.00262221	0.924536	6.73e-21
	cg15161667	LRP4	NM_002334	-0.42444	0.00264135	0.877947	2.55e-16
	cg00434119	DGKG;DGKG;DGKG	NM_001346;NM_001080744;NM_001080745	-0.424361	0.00264674	0.89497	9.75e-18
	cg26922854			-0.424081	0.00266589	0.889156	3.16e-17
	cg16618493	ZBTB7B	NM_015872	-0.424011	0.00267075	0.913002	1.56e-19
	cg00619628	MTHFD1L	NM_015440	-0.423907	0.00267789	0.906889	6.97e-19
	cg14436426	OPRL1;RGS19;OPRL1	NM_000913;NM_001039467;NM_182647	-0.423424	0.00271135	0.847145	3.2e-14
	cg00879824			-0.423215	0.00272599	0.904729	1.15e-18
	cg06528823	KIF5B	NM_004521	-0.422658	0.00276524	0.910143	3.19e-19
	cg01876978			-0.422583	0.00277053	0.832957	2.1e-13
	cg04962621	MGRN1;MGRN1;MGRN1;MGRN1	NM_015246;NM_001142291;NM_001142290;NM_001142289	-0.422402	0.00278341	0.901258	2.53e-18
	cg13443911	TGFBR1;TGFBR1	NM_001130916;NM_004612	-0.422088	0.00280586	0.846526	3.48e-14
	cg08299521			-0.421991	0.00281285	0.852087	1.59e-14
	cg05532239	CCT3;C1orf182;CCT3;CCT3	NM_001008800;NM_144627;NM_001008883;NM_005998	-0.421424	0.00285392	0.895936	7.97e-18
	cg26057969	TPRA1;TPRA1	NM_001136053;NM_001142646	-0.421339	0.00286017	0.902139	2.08e-18
	cg05729480	2019-09-09	NM_001113491	-0.420753	0.00290324	0.931459	7.94e-22
	cg17950348	DNAJB6	NM_058246	-0.420588	0.00291548	0.866416	1.79e-15
	cg18493214	KIF13A;KIF13A;KIF13A;KIF13A	NM_001105566;NM_022113;NM_001105568;NM_001105567	-0.420286	0.00293801	0.876709	3.18e-16
	cg08173709	FOXP1	NM_032682	-0.420281	0.00293839	0.92567	4.81e-21
	cg16696476	RANGRF;SLC25A35	NM_016492;NM_201520	-0.42027	0.00293921	0.821062	8.9e-13
	cg16603916	ECE1;ECE1;ECE1	NM_001397;NM_001113349;NM_001113348	-0.419722	0.00298045	0.909393	3.83e-19
	cg25084760	PCCA;PCCA	NM_001127692;NM_000282	-0.41943	0.00300267	0.915851	7.5e-20
	cg25670076	BACH2;BACH2	NM_021813;NM_001170794	-0.419412	0.00300404	0.916782	5.87e-20
	cg18681352	SMCR7L	NM_019008	-0.419116	0.00302669	0.808203	3.78e-12
	cg11748260	DHX16;DHX16	NM_001164239;NM_003587	-0.418856	0.00304666	0.935545	2.02e-22
	cg06705017			-0.418707	0.00305826	0.904776	1.14e-18
	cg01620248	ZBTB42	NM_001137601	-0.418529	0.00307206	0.884306	8.01e-17
	cg11606261	SP1;SP1	NM_003109;NM_138473	-0.4185	0.00307428	0.899928	3.39e-18
	cg04710179	TBC1D1	NM_015173	-0.418293	0.00309049	0.9216	1.57e-20
	cg06672250	EPB49;EPB49;EPB49;EPB49	NM_001114135;NM_001114136;NM_001114139;NM_001114137	-0.418142	0.00310227	0.863944	2.66e-15
	cg08477158	BCAS3;BCAS3	NM_001099432;NM_017679	-0.417882	0.00312278	0.924903	6.04e-21
	cg06030535			-0.417756	0.00313271	0.924962	5.94e-21
	cg22406102			-0.417682	0.00313856	0.824946	5.61e-13
	cg05528339			-0.417488	0.00315395	0.910741	2.75e-19
	cg07313319	CSNK1E;CSNK1E	NM_001894;NM_152221	-0.417326	0.00316694	0.843955	4.96e-14
	cg13679804			-0.417105	0.00318464	0.864477	2.44e-15
	cg23260754			-0.417035	0.00319027	0.944066	8.49e-24
	cg14089110	ASGR2;ASGR2;ASGR2;ASGR2	NM_080914;NM_001181;NM_080912;NM_080913	-0.416752	0.00321309	0.919325	2.95e-20
	cg07000116	ZNF689	NM_138447	-0.416669	0.00321978	0.921949	1.42e-20
	cg19557110	ANKFY1	NM_016376	-0.416648	0.00322153	0.836519	1.33e-13
	cg00401678	EMR3	NM_032571	-0.416504	0.00323321	0.871351	7.96e-16
	cg27575890	EIF3D	NM_003753	-0.416482	0.00323502	0.827444	4.15e-13
	cg08615650	ADRBK1	NM_001619	-0.416451	0.00323752	0.917409	4.96e-20
	cg11061343	C17orf106	NM_001113324	-0.416451	0.00323752	0.923972	7.94e-21
	cg00791854	IL6R;IL6R	NM_181359;NM_000565	-0.416325	0.00324781	0.849075	2.44e-14
	cg24575128	NISCH	NM_007184	-0.416314	0.00324874	0.933979	3.45e-22
	cg00916854	VPS37B	NM_024667	-0.416305	0.00324945	0.937092	1.17e-22
	cg26861460	PARVG;PARVG;PARVG;PARVG	NM_022141;NM_001137605;NR_024427;NR_024426	-0.41629	0.00325066	0.927397	2.86e-21
	cg16305292			-0.415293	0.00333311	0.924116	7.62e-21
	cg04119529	NTHL1	NM_002528	-0.415288	0.00333355	0.861655	3.8e-15
	cg26538140			-0.414323	0.00341507	0.916643	6.09e-20
	cg20849109	KBTBD11	NM_014867	-0.414223	0.0034236	0.908809	4.41e-19
	cg10646422			-0.414159	0.00342913	0.917836	4.43e-20
	cg27585074	CSNK1G2	NM_001319	-0.414049	0.00343857	0.935908	1.78e-22
	cg15334250	EPHB3	NM_004443	-0.413936	0.00344824	0.925427	5.17e-21
	cg16129132	OSBPL5;OSBPL5;OSBPL5	NM_020896;NM_001144063;NM_145638	-0.413682	0.00347019	0.919552	2.78e-20
	cg25352940			-0.413655	0.00347253	0.835733	1.47e-13
	cg07995200			-0.413518	0.00348446	0.917999	4.24e-20
	cg11180667			-0.413464	0.00348911	0.933313	4.31e-22
	cg20130744	PLXDC2	NM_032812	-0.413395	0.00349513	0.868295	1.32e-15
	cg00135888	MIR130A	NR_029673	-0.413156	0.00351604	0.843951	4.96e-14
	cg00704780	HDLBP;HDLBP	NM_203346;NM_005336	-0.413016	0.00352831	0.875811	3.72e-16
	cg04044203	ESAM	NM_138961	-0.412896	0.00353886	0.871669	7.55e-16
	cg23490396	LASS6	NM_203463	-0.412888	0.00353961	0.83767	1.14e-13
	cg03340408	NAV1	NM_020443	-0.412853	0.00354264	0.862648	3.25e-15
	cg27180555			-0.412596	0.00356541	0.944259	7.86e-24
	cg19494591	MKRN1;MKRN1	NM_001145125;NM_013446	-0.41256	0.00356861	0.849743	2.22e-14
	cg02175033	KIAA0247	NM_014734	-0.41191	0.00362673	0.914416	1.09e-19
	cg11731437			-0.411722	0.00364369	0.89228	1.69e-17
	cg20476021			-0.411555	0.00365886	0.816538	1.5e-12
	cg25865108			-0.411481	0.00366551	0.8308	2.75e-13
	cg08120023	C1orf203;ATP1A1;ATP1A1;ATP1A1;C1orf203	NR_027646;NM_001160233;NM_001160234;NM_000701;NR_027645	-0.411415	0.00367154	0.814123	1.97e-12
	cg23702848	XRCC3;XRCC3;XRCC3	NM_001100119;NM_005432;NM_001100118	-0.411352	0.00367726	0.818256	1.23e-12
	cg00510149	MRVI1;MRVI1;MRVI1;MRVI1	NM_001100163;NM_001098579;NM_130385;NM_001100167	-0.411348	0.00367762	0.893212	1.4e-17
	cg17593384	AFF1;AFF1	NM_001166693;NM_005935	-0.411236	0.0036879	0.942706	1.45e-23
	cg15961693			-0.410962	0.003713	0.804963	5.36e-12
	cg01521397	TAF4	NM_003185	-0.410892	0.00371945	0.869864	1.02e-15
	cg26079320	POGK	NM_017542	-0.410856	0.00372271	0.850941	1.87e-14
	cg19464524	CPEB3	NM_014912	-0.410845	0.00372376	0.871617	7.62e-16
	cg18805734	FAM60A;FAM60A;FAM60A	NM_021238;NM_001135811;NM_001135812	-0.410806	0.00372735	0.83829	1.06e-13
	cg26585899	ATXN1L;ZNF821	NR_024612;NM_017530	-0.410515	0.00375427	0.836384	1.35e-13
	cg21742790			-0.410459	0.00375943	0.963996	4.19e-28
	cg19673125	RAET1G	NM_001001788	-0.410419	0.00376322	0.849862	2.18e-14
	cg13745346	CBFA2T3	NM_005187	-0.410293	0.00377488	0.903265	1.61e-18
	cg14266156			-0.410263	0.00377771	0.835358	1.54e-13
	cg20283498	CDH23;CDH23	NM_052836;NM_022124	-0.410033	0.00379924	0.951261	3.87e-25
	cg00303335			-0.409874	0.00381416	0.842529	6.01e-14
	cg06853894	TNFRSF8;TNFRSF8	NM_001243;NM_152942	-0.409721	0.0038286	0.874728	4.49e-16
	cg15986587			-0.409619	0.00383827	0.922633	1.17e-20
	cg00842918	GAS7;GAS7	NM_201432;NM_201433	-0.409465	0.00385281	0.928572	1.99e-21
	cg23696212	ATF7;ATF7	NM_001130060;NM_006856	-0.409362	0.00386262	0.83253	2.21e-13
	cg12057242	CPSF3	NM_016207	-0.409245	0.00387382	0.908341	4.93e-19
	cg08574558			-0.408928	0.00390411	0.902159	2.07e-18
	cg18022893	RNF220	NM_018150	-0.4089	0.00390684	0.908658	4.57e-19
	cg18521796	KIAA1257	NM_020741	-0.408831	0.00391345	0.86146	3.92e-15
	cg01441777	CSNK1E;CSNK1E	NM_001894;NM_152221	-0.408806	0.0039159	0.890504	2.42e-17
	cg16062253	NOTCH4	NM_004557	-0.408563	0.00393939	0.829601	3.19e-13
	cg25743819			-0.408551	0.00394054	0.87121	8.15e-16
	cg04881903	CAPG	NM_001747	-0.408448	0.00395048	0.852349	1.53e-14
	cg06532779	GRIN3B	NM_138690	-0.408337	0.00396125	0.806031	4.78e-12
	cg12509665	CERK	NM_022766	-0.408322	0.00396271	0.823436	6.72e-13
	cg13984746	HEXDC	NM_173620	-0.407878	0.00400621	0.928522	2.02e-21
	cg00127150	ZNF280B	NM_080764	-0.407846	0.00400928	0.89048	2.43e-17
	cg00420997	C8orf75	NR_026765	-0.407325	0.00406085	0.844522	4.59e-14
	cg00142482	C10orf128	NM_001010863	-0.407068	0.00408647	0.816177	1.56e-12
	cg14971586	BIK	NM_001197	-0.406942	0.00409907	0.815653	1.66e-12
	cg07296841			-0.406649	0.00412852	0.801759	7.51e-12
	cg13327134	RARG	NM_000966	-0.406456	0.00414812	0.862797	3.18e-15
	cg00500176	ICAM4;ICAM4;ICAM4;ICAM1	NM_001039132;NM_001544;NM_022377;NM_000201	-0.406375	0.00415628	0.944028	8.62e-24
	cg21926619	TTC25	NM_031421	-0.406277	0.00416626	0.852065	1.59e-14
	cg02835421	IPO13	NM_014652	-0.405896	0.00420518	0.869385	1.1e-15
	cg03331229	MMP13	NM_002427	-0.405736	0.00422161	0.874174	4.93e-16
	cg04764812			-0.405732	0.00422199	0.928055	2.33e-21
	cg09756109	IFT140;TMEM204	NM_014714;NM_024600	-0.405708	0.00422446	0.847288	3.13e-14
	cg16967583	AGXT	NM_000030	-0.405447	0.00425143	0.928916	1.79e-21
	cg24352369	LOC440839	NR_029399	-0.405147	0.00428259	0.836991	1.25e-13
	cg11147155	ENSA;ENSA;ENSA;ENSA	NM_207045;NM_207042;NM_004436;NM_207046	-0.405002	0.00429769	0.889691	2.84e-17
	cg18806193	CLPTM1L	NM_030782	-0.404903	0.00430809	0.890314	2.51e-17
	cg16004377	LGALS12;LGALS12;LGALS12	NM_033101;NM_001142535;NM_001142536	-0.404684	0.00433102	0.955196	5.82e-26
	cg17741629	SETDB2;SETDB2	NM_001160308;NM_031915	-0.404648	0.00433488	0.816781	1.46e-12
	cg07223106	PCNXL2	NM_014801	-0.40456	0.00434411	0.92391	8.09e-21
	cg09169633	MAN2A2	NM_006122	-0.404451	0.00435566	0.933249	4.41e-22
	cg13914004	ST6GALNAC6	NM_013443	-0.404151	0.00438744	0.867358	1.54e-15
	cg08231648			-0.404135	0.00438915	0.928502	2.03e-21
	cg22851080	TNXB	NM_019105	-0.403737	0.00443176	0.801615	7.63e-12
	cg16899991			-0.403694	0.00443631	0.901551	2.37e-18
	cg01566692	SMG1	NM_015092	-0.403688	0.00443701	0.908808	4.41e-19
	cg00328376	SKAP2	NM_003930	-0.403278	0.00448124	0.904938	1.1e-18
	cg07769015	SLC45A4	NM_001080431	-0.403214	0.00448818	0.939111	5.67e-23
	cg07879785	CRYL1	NM_015974	-0.403086	0.00450208	0.932366	5.9e-22
	cg06336535	FCHO1;FCHO1;FCHO1;FCHO1	NM_015122;NM_001161358;NM_001161359;NM_001161357	-0.402952	0.00451669	0.844863	4.38e-14
	cg27513339			-0.402925	0.00451969	0.823541	6.64e-13
	cg26017506	ASB14;ASB14	NM_130387;NM_001142733	-0.402813	0.0045319	0.883241	9.78e-17
	cg14268557	TRIM27	NM_006510	-0.402151	0.00460493	0.931252	8.49e-22
	cg09492074	MEGF11	NM_032445	-0.401555	0.00467154	0.933783	3.68e-22
	cg10866623	TTLL6	NM_001130918	-0.401077	0.00472547	0.85417	1.17e-14
	cg08164191			-0.400992	0.00473516	0.905339	1e-18
	cg16762030			-0.400671	0.00477184	0.948344	1.43e-24
	cg19882784	C7orf49;C7orf49;C7orf49	NM_024033;NR_024185;NR_024186	-0.400661	0.00477297	0.90394	1.38e-18
	cg08708079	SPEF1	NM_015417	-0.400551	0.00478555	0.930399	1.12e-21
	cg03572260	STARD3;STARD3;STARD3	NM_006804;NM_001165937;NM_001165938	-0.400149	0.00483197	0.953142	1.6e-25
	cg18793215	CRABP2	NM_001878	-0.399872	0.00486413	0.911931	2.05e-19
	cg08220149	NDE1;NDE1	NM_017668;NM_001143979	-0.399687	0.00488568	0.893551	1.31e-17
	cg24259291	ZNFX1	NM_021035	-0.399548	0.00490205	0.925632	4.87e-21
	cg26233331	S100P;S100P	NM_005980;NM_005980	-0.399399	0.00491951	0.920264	2.28e-20
	cg07531182	XYLT1	NM_022166	-0.399383	0.0049214	0.925331	5.32e-21
	cg09238666	TK2	NM_004614	-0.39927	0.0049347	0.818266	1.23e-12
	cg04735908	ACIN1;ACIN1;ACIN1;ACIN1;ACIN1	NM_001164817;NM_001164815;NM_014977;NM_001164816;NM_001164814	-0.398834	0.00498641	0.871531	7.73e-16
	cg23369670	XRCC3;XRCC3;XRCC3	NM_001100119;NM_005432;NM_001100118	-0.398802	0.00499022	0.947059	2.48e-24
	cg27288091	COX4I1	NM_001861	-0.398713	0.00500073	0.854791	1.07e-14
	cg20246851	SEMA4B	NM_020210	-0.398634	0.00501025	0.857597	7.06e-15
	cg08944026	ANKRD33B	NM_001164440	-0.398616	0.00501233	0.950884	4.6e-25
	cg22045288	C10orf91	NM_173541	-0.398578	0.00501696	0.893936	1.21e-17
	cg22989958	DOK1	NM_001381	-0.398445	0.00503281	0.953496	1.35e-25
	cg08141553	GALNT2	NM_004481	-0.398398	0.00503855	0.83525	1.57e-13
	cg03082779	ZMYND8;LOC100131496;ZMYND8;ZMYND8	NM_183048;NR_024594;NM_183047;NM_012408	-0.398394	0.00503901	0.944	8.72e-24
	cg00510447	TNFRSF12A	NM_016639	-0.398247	0.00505665	0.819745	1.04e-12
	cg18089000	GBGT1	NM_021996	-0.398088	0.00507585	0.861524	3.88e-15
	cg06710735	CAMP	NM_004345	-0.398001	0.00508643	0.89653	7.03e-18
	cg10309609	TOP1MT	NM_052963	-0.397627	0.00513186	0.828077	3.84e-13
	cg01869896	MFSD2A;MFSD2A	NM_032793;NM_001136493	-0.39758	0.00513759	0.926507	3.74e-21
	cg06010437			-0.397537	0.00514286	0.900444	3.03e-18
	cg23362032			-0.397307	0.00517104	0.926539	3.71e-21
	cg19362478			-0.397182	0.00518644	0.940103	3.93e-23
	cg02108620	ULK4	NM_017886	-0.397067	0.00520066	0.897261	6.02e-18
	cg25535106	GTF3C2;GTF3C2	NM_001035521;NM_001521	-0.396989	0.00521032	0.891816	1.86e-17
	cg25079915	TMEM37	NM_183240	-0.396843	0.00522836	0.887687	4.21e-17
	cg07512993	TK2	NM_004614	-0.396559	0.00526373	0.955862	4.15e-26
	cg23530553	HOXB2	NM_002145	-0.396452	0.00527701	0.922926	1.08e-20
	cg25099154			-0.396118	0.00531898	0.835051	1.61e-13
	cg23590660	FOXJ2	NM_018416	-0.395497	0.0053977	0.91516	8.98e-20
	cg02878831	RPTOR;RPTOR	NM_001163034;NM_020761	-0.395384	0.00541208	0.841051	7.33e-14
	cg19695041	TACC1	NM_001146216	-0.395152	0.00544186	0.827368	4.19e-13
	cg12537379	CUX1;CUX1;CUX1	NM_181500;NM_181552;NM_001913	-0.395123	0.00544565	0.888947	3.29e-17
	cg07427438			-0.395089	0.00545002	0.942415	1.63e-23
	cg16539741	CHN2	NM_004067	-0.394895	0.00547492	0.850086	2.11e-14
	cg03739609	LST1;LST1;LST1;LST1;LST1;LST1;LST1;LST1;LST1;LST1;LST1	NR_029461;NM_007161;NM_205839;NM_205838;NM_001166538;NR_029462;NM_205840;NM_205837;NM_001166538;NM_007161;NM_205840	-0.394826	0.00548387	0.927192	3.04e-21
	cg09113070	ST3GAL5	NM_003896	-0.394772	0.00549094	0.879163	2.06e-16
	cg03655701	C1orf130	NM_001010980	-0.394716	0.00549816	0.931077	8.99e-22
	cg07572909	SLC16A1;SLC16A1	NM_001166496;NM_003051	-0.394556	0.00551896	0.809442	3.31e-12
	cg20699548	NCOA2	NM_006540	-0.394475	0.00552945	0.87677	3.14e-16
	cg01999566	DHX16;DHX16	NM_001164239;NM_003587	-0.394354	0.0055452	0.909469	3.76e-19
	cg00536532	C6orf227	NR_027908	-0.394319	0.00554984	0.84463	4.52e-14
	cg18688704	PDGFC	NM_016205	-0.394142	0.00557303	0.823902	6.36e-13
	cg27553947	CLSTN1;CLSTN1	NM_001009566;NM_014944	-0.394121	0.00557569	0.842586	5.97e-14
	cg15888569	CPEB2;CPEB2	NM_182646;NM_182485	-0.394071	0.00558232	0.880678	1.57e-16
	cg01001049	USP7	NM_003470	-0.393919	0.00560232	0.898051	5.09e-18
	cg21519701	TEX2	NM_018469	-0.393867	0.00560911	0.94577	4.25e-24
	cg00855901	IFI44L	NM_006820	-0.393607	0.00564362	0.851053	1.84e-14
	cg00615241	PRTN3	NM_002777	-0.393594	0.00564532	0.910792	2.72e-19
	cg27589594	SLC5A10;SLC5A10	NM_001042450;NM_152351	-0.393356	0.00567696	0.908403	4.86e-19
	cg08136416			-0.393219	0.00569522	0.930613	1.04e-21
	cg25389328	THRA;THRA	NM_003250;NM_199334	-0.393142	0.00570557	0.919807	2.59e-20
	cg15704662			-0.392601	0.00577835	0.87521	4.13e-16
	cg23090046	KLC1;KLC1;KLC1	NM_005552;NM_182923;NM_001130107	-0.39258	0.00578125	0.9358	1.85e-22
	cg04858148	PRDM8	NM_020226	-0.392571	0.00578245	0.905441	9.78e-19
	cg07283015	HRH4;HRH4;HRH4	NM_021624;NM_001160166;NM_001143828	-0.3925	0.00579206	0.930832	9.73e-22
	cg24397007	FOSL2	NM_005253	-0.392313	0.00581754	0.821838	8.12e-13
	cg11908131	C2orf40	NM_032411	-0.392117	0.00584426	0.913121	1.52e-19
	cg08064068			-0.391765	0.00589246	0.872191	6.91e-16
	cg18305855	C7orf60	NM_152556	-0.391567	0.00591989	0.801642	7.6e-12
	cg10236857	ARHGDIA	NM_004309	-0.391036	0.00599366	0.850776	1.92e-14
	cg25915871	PTRH2	NM_016077	-0.390614	0.00605297	0.849285	2.37e-14
	cg22777724	HOXB2	NM_002145	-0.390566	0.00605967	0.879212	2.04e-16
	cg21072795	NCKAP1L	NM_005337	-0.390522	0.00606586	0.929642	1.42e-21
	cg01627483	MTMR9L	NR_026850	-0.390465	0.00607401	0.828564	3.62e-13
	cg04903089	HLA-DMB	NM_002118	-0.390406	0.00608226	0.931422	8.04e-22
	cg09704136	ZYX;ZYX	NM_003461;NM_001010972	-0.390403	0.00608272	0.900938	2.71e-18
	cg01441127	MR1	NM_001531	-0.390384	0.00608545	0.894028	1.19e-17
	cg13981787	SIGLEC12	NM_053003	-0.390284	0.00609964	0.806417	4.59e-12
	cg13785123	ENO1	NM_001428	-0.390211	0.00610989	0.881579	1.33e-16
	cg02840585	PRKCZ;PRKCZ;PRKCZ	NM_001033581;NM_001033582;NM_002744	-0.390178	0.00611461	0.904975	1.09e-18
	cg06062279	GALNS	NM_000512	-0.39014	0.00612003	0.802026	7.3e-12
	cg01519094	PKNOX2	NM_022062	-0.390037	0.00613478	0.886979	4.82e-17
	cg04623270	C16orf80	NM_013242	-0.389775	0.00617223	0.894662	1.04e-17
	cg10284440	MLKL;MLKL	NM_001142497;NM_152649	-0.389719	0.00618022	0.842411	6.11e-14
	cg02127980	RXRA	NM_002957	-0.389611	0.00619575	0.928705	1.91e-21
	cg10763374	COMMD3;BMI1	NM_012071;NM_005180	-0.389572	0.0062013	0.913511	1.37e-19
	cg18818075			-0.389572	0.00620141	0.920846	1.94e-20
	cg08947894			-0.389474	0.00621553	0.818723	1.17e-12
	cg10070185	SERPINA1;SERPINA1;SERPINA1;SERPINA1;SERPINA1;SERPINA1;SERPINA1;SERPINA1;SERPINA1;SERPINA1	NM_001127706;NM_001127704;NM_001127700;NM_001127701;NM_001127707;NM_001002235;NM_001127703;NM_001127705;NM_001127702;NM_001002236	-0.389392	0.00622727	0.85093	1.87e-14
	cg06068801	PPP1R1B;PPP1R1B	NM_181505;NM_032192	-0.389021	0.00628108	0.894349	1.11e-17
	cg08066875			-0.388921	0.00629567	0.915487	8.25e-20
	cg00201133	CCNY;CCNY	NM_145012;NM_181698	-0.388625	0.00633909	0.931358	8.21e-22
	cg01450522			-0.388497	0.00635782	0.903959	1.38e-18
	cg02551745			-0.388446	0.00636539	0.898254	4.87e-18
	cg17044311	ABCC2	NM_000392	-0.388326	0.00638305	0.880601	1.59e-16
	cg04362887			-0.387965	0.00643657	0.91327	1.46e-19
	cg12249234	KSR1	NM_014238	-0.387937	0.00644064	0.918249	3.96e-20
	cg01676795	POR	NM_000941	-0.387935	0.00644101	0.907409	6.16e-19
	cg06294475	KCNQ1;KCNQ1OT1;KCNQ1	NM_000218;NR_002728;NM_181798	-0.387898	0.00644653	0.905482	9.69e-19
	cg13840419			-0.387741	0.00646998	0.831787	2.43e-13
	cg08398132			-0.387654	0.00648296	0.946323	3.37e-24
	cg09884146	SPRED2;SPRED2;SPRED2	NM_001128210;NM_001128210;NM_181784	-0.387392	0.00652226	0.872221	6.88e-16
	cg02039171	CEBPE	NM_001805	-0.387296	0.00653666	0.931781	7.15e-22
	cg17129188	NDRG1;NDRG1	NM_001135242;NM_006096	-0.387182	0.00655391	0.884349	7.95e-17
	cg00637104			-0.387085	0.00656849	0.937436	1.04e-22
	cg11254053	AK2;AK2	NM_013411;NM_001625	-0.386491	0.00665905	0.93416	3.24e-22
	cg00001874	ATOH7;ATOH7	NM_145178;NM_145178	-0.386045	0.00672756	0.849648	2.25e-14
	cg09734011	PCDH24	NM_017675	-0.385765	0.00677102	0.876974	3.03e-16
	cg26417554	RPUSD3;RPUSD3	NM_001142547;NM_173659	-0.385729	0.00677655	0.886349	5.44e-17
	cg17823175	AZU1	NM_001700	-0.385616	0.00679428	0.915176	8.95e-20
	cg27000690	PACSIN1	NM_020804	-0.385594	0.00679769	0.912025	2e-19
	cg16947394	TMEM110	NM_198563	-0.385527	0.00680818	0.937842	8.99e-23
	cg12405599	RPN1	NM_002950	-0.385515	0.00681001	0.883502	9.31e-17
	cg14464245	AGPAT2;AGPAT2	NM_006412;NM_001012727	-0.385257	0.00685034	0.946207	3.54e-24
	cg10593922			-0.385021	0.0068875	0.884674	7.48e-17
	cg05343404	TBXA2R;TBXA2R	NM_201636;NM_001060	-0.385001	0.00689067	0.914939	9.52e-20
	cg04797885			-0.384979	0.00689411	0.869867	1.02e-15
	cg18222653			-0.38491	0.0069051	0.901362	2.47e-18
	cg10552698	PDHB	NM_000925	-0.384733	0.00693312	0.819291	1.09e-12
	cg19223782	RNH1;RNH1;RNH1;RNH1;RNH1;RNH1;RNH1;RNH1	NM_203384;NM_203385;NM_203387;NM_203388;NM_203383;NM_203389;NM_002939;NM_203386	-0.384531	0.00696518	0.81164	2.6e-12
	cg19689330	FARS2	NM_006567	-0.384265	0.00700774	0.805511	5.06e-12
	cg24777399	SH3RF3	NM_001099289	-0.384225	0.00701411	0.906847	7.04e-19
	cg20641026	PIP4K2A	NM_005028	-0.384195	0.00701888	0.91414	1.17e-19
	cg25899154			-0.384187	0.00702011	0.837362	1.19e-13
	cg22678754			-0.384039	0.00704399	0.884741	7.38e-17
	cg10585621	RPTOR;RPTOR	NM_001163034;NM_020761	-0.383897	0.00706676	0.801262	7.91e-12
	cg04205769	DPH5;DPH5;DPH5	NM_001077395;NM_015958;NM_001077394	-0.383706	0.00709769	0.913889	1.25e-19
	cg20874785	LOC100189589	NR_024463	-0.383655	0.00710589	0.915462	8.31e-20
	cg19238325	GPR62	NM_080865	-0.383405	0.00714652	0.868287	1.32e-15
	cg13524037	HLA-DMB	NM_002118	-0.382425	0.00730774	0.916258	6.74e-20
	cg14272075	RNF126P1	NR_002818	-0.382423	0.00730803	0.930631	1.04e-21
	cg07744502	C11orf75	NM_020179	-0.382395	0.00731276	0.905731	9.14e-19
	cg12156887			-0.382248	0.00733711	0.850684	1.94e-14
	cg05196835	TBC1D1	NM_015173	-0.382151	0.00735335	0.807001	4.31e-12
	cg00390511	AOAH	NM_001637	-0.382024	0.00737464	0.922164	1.34e-20
	cg00563348			-0.381887	0.00739748	0.895603	8.55e-18
	cg23774975	RHOG	NM_001665	-0.381853	0.00740328	0.873625	5.42e-16
	cg19614321	RASSF2	NM_014737	-0.381846	0.00740434	0.876119	3.52e-16
	cg12866960	IRAK3;IRAK3	NM_001142523;NM_007199	-0.381796	0.00741284	0.922688	1.15e-20
	cg09723776	NSMCE2	NM_173685	-0.381652	0.00743704	0.917214	5.23e-20
	cg25201363	LRPAP1	NM_002337	-0.381332	0.00749124	0.825708	5.12e-13
	cg17380091	REXO1	NM_020695	-0.381305	0.00749583	0.872133	6.98e-16
	cg13598881	WRNIP1;WRNIP1	NM_130395;NM_020135	-0.381088	0.00753266	0.839498	9.01e-14
	cg04904784			-0.380935	0.00755888	0.925458	5.13e-21
	cg16230352			-0.380714	0.00759665	0.912491	1.78e-19
	cg08170911	PRKCD;PRKCD	NM_212539;NM_006254	-0.380313	0.00766574	0.925049	5.79e-21
	cg20795701	C6orf10	NM_006781	-0.380216	0.00768265	0.89334	1.37e-17
	cg12156512	FKRP;FKRP	NM_001039885;NM_024301	-0.380207	0.00768412	0.862852	3.15e-15
	cg11801411	WDR81;WDR81;WDR81;WDR81	NM_001163673;NM_001163809;NM_001163811;NM_152348	-0.3802	0.0076854	0.869901	1.01e-15
	cg17209188	IGF2BP3	NM_006547	-0.380146	0.00769475	0.91539	8.46e-20
	cg21932231	CRIM1	NM_016441	-0.380002	0.00771971	0.874454	4.7e-16
	cg10447327	LANCL1;LANCL1;LANCL1	NM_001136574;NM_006055;NM_001136575	-0.379923	0.00773356	0.918349	3.85e-20
	cg01063280			-0.379682	0.00777561	0.950655	5.1e-25
	cg21697512	CD34;CD34	NM_001025109;NM_001773	-0.3794	0.00782531	0.912595	1.73e-19
	cg19588519			-0.379331	0.00783734	0.898856	4.28e-18
	cg14454680	C3orf26;FILIP1L;FILIP1L	NM_032359;NM_182909;NM_001042459	-0.379319	0.00783954	0.900428	3.04e-18
	cg01253753	CLEC4D;CLEC4D	NM_080387;NM_080387	-0.379303	0.00784237	0.922838	1.1e-20
	cg11419931			-0.379212	0.00785844	0.815348	1.72e-12
	cg02468770			-0.379126	0.00787363	0.849025	2.46e-14
	cg01734045	COL25A1;COL25A1	NM_198721;NM_032518	-0.378284	0.00802401	0.836343	1.36e-13
	cg26132647			-0.378136	0.00805072	0.921498	1.61e-20
	cg11586034	VPS45	NM_007259	-0.378011	0.00807332	0.821543	8.41e-13
	cg18637761	PITPNM2	NM_020845	-0.377888	0.00809565	0.890509	2.42e-17
	cg14066773	PLEKHJ1;MIR1227	NM_018049;NR_031596	-0.37781	0.00810979	0.898963	4.18e-18
	cg17904988	NDUFS2;ADAMTS4;ADAMTS4	NM_004550;NM_005099;NM_005099	-0.37781	0.00810987	0.930746	1e-21
	cg12617080	IQGAP3	NM_178229	-0.377662	0.00813663	0.943489	1.07e-23
	cg25678231	ETV3L	NM_001004341	-0.377634	0.00814186	0.918597	3.6e-20
	cg24013213	GUCY1B2	NR_003923	-0.377628	0.00814297	0.805111	5.28e-12
	cg25647583	FES;FES;FES;FES	NM_002005;NM_001143783;NM_001143784;NM_001143785	-0.377579	0.0081518	0.935291	2.2e-22
	cg05509696	MOBKL1A	NM_173468	-0.377513	0.00816382	0.818745	1.16e-12
	cg00154119			-0.37744	0.00817733	0.945277	5.2e-24
	cg20364025	GALNS	NM_000512	-0.377382	0.0081879	0.885196	6.77e-17
	cg25246281	MIR451;MIR144	NR_029970;NR_029685	-0.377336	0.00819632	0.840749	7.63e-14
	cg09888840	SLC43A1	NM_003627	-0.377247	0.00821265	0.904744	1.15e-18
	cg00042568	NR2C2	NM_003298	-0.377208	0.00821981	0.926782	3.44e-21
	cg02797539	RAB37;RAB37;RAB37;RAB37	NM_001006638;NM_175738;NM_001163990;NM_001163989	-0.377022	0.00825407	0.894446	1.09e-17
	cg03609435			-0.377006	0.008257	0.912394	1.82e-19
	cg18568335	PACS2;PACS2	NM_015197;NM_001100913	-0.376854	0.00828518	0.936718	1.34e-22
	cg03589820	ATG7;ATG7;ATG7	NM_001136031;NM_001144912;NM_006395	-0.376443	0.00836148	0.857914	6.73e-15
	cg06233202			-0.376236	0.00840016	0.90913	4.08e-19
	cg18276112	FOXK1	NM_001037165	-0.376213	0.00840462	0.857022	7.69e-15
	cg19351604	ARHGEF10	NM_014629	-0.376078	0.0084299	0.914182	1.16e-19
	cg17024257	PLD1;PLD1	NM_001130081;NM_002662	-0.376031	0.00843868	0.810091	3.08e-12
	cg09335715	STYXL1	NM_016086	-0.375985	0.00844745	0.90741	6.16e-19
	cg17291166			-0.375966	0.00845089	0.929915	1.3e-21
	cg02710860	MAPKBP1;MAPKBP1	NM_014994;NM_001128608	-0.375831	0.00847634	0.822674	7.36e-13
	cg26615176	SLC25A45;SLC25A45	NM_001077241;NM_182556	-0.375758	0.0084902	0.865432	2.1e-15
	cg18278694	CEP350	NM_014810	-0.375557	0.00852826	0.955909	4.06e-26
	cg08106108	RNMTL1	NM_018146	-0.375497	0.00853966	0.888763	3.41e-17
	cg10533990	FOLR3	NM_000804	-0.375272	0.00858246	0.940607	3.25e-23
	cg13569051	GSN;GSN;GSN;GSN;GSN;GSN;GSN	NM_001127664;NM_001127667;NM_001127662;NM_198252;NM_001127665;NM_001127663;NM_001127666	-0.375042	0.0086266	0.865544	2.06e-15
	cg10609371	DCAF15;PODNL1;PODNL1	NM_138353;NM_001146254;NM_001146255	-0.374782	0.00867655	0.830877	2.72e-13
	cg11028872			-0.374605	0.00871061	0.820725	9.25e-13
	cg16768966	GAS7;GAS7	NM_201433;NM_201432	-0.374591	0.00871338	0.925811	4.61e-21
	cg18554789	HIPK2;HIPK2	NM_001113239;NM_022740	-0.374501	0.00873071	0.935426	2.1e-22
	cg16624482	UMODL1;UMODL1	NM_173568;NM_001004416	-0.374478	0.00873521	0.829785	3.11e-13
	cg05600496			-0.374454	0.00873993	0.891386	2.03e-17
	cg12970512	TRAF3;TRAF3;TRAF3	NM_145726;NM_003300;NM_145725	-0.374375	0.00875517	0.892014	1.79e-17
	cg21253130	FRY	NM_023037	-0.374211	0.00878714	0.944163	8.17e-24
	cg00785482			-0.373971	0.00883394	0.922858	1.1e-20
	cg16506970	KIAA0232;KIAA0232	NM_014743;NM_001100590	-0.373834	0.00886076	0.92952	1.48e-21
	cg25853622	LPP;LPP;LPP	NM_005578;NM_001167671;NM_001167672	-0.373777	0.0088719	0.923995	7.89e-21
	cg12939085	PPP1CA;PPP1CA;PPP1CA	NM_001008709;NM_206873;NM_002708	-0.373645	0.00889803	0.902186	2.06e-18
	cg18118738	UHRF1BP1	NM_017754	-0.373413	0.00894378	0.877219	2.91e-16
	cg01477971	TMEM182	NM_144632	-0.37318	0.00898995	0.928071	2.32e-21
	cg13232525	PLEKHG6;PLEKHG6;PLEKHG6	NM_001144856;NM_001144857;NM_018173	-0.373156	0.00899468	0.863134	3.02e-15
	cg10389644	MAFK	NM_002360	-0.373073	0.00901126	0.903818	1.42e-18
	cg15958424	ACPP;ACPP	NM_001099;NM_001134194	-0.37306	0.00901372	0.883575	9.19e-17
	cg17207736	SLC45A4	NM_001080431	-0.37253	0.0091199	0.815555	1.68e-12
	cg22862005	SLC26A9;SLC26A9;SLC26A9	NM_052934;NM_001142600;NM_134325	-0.372461	0.00913379	0.911903	2.06e-19
	cg00268476	KCTD5	NM_018992	-0.372308	0.00916461	0.904714	1.16e-18
	cg25349990			-0.372267	0.00917286	0.873784	5.27e-16
	cg18329052	SLC11A1	NM_000578	-0.37186	0.00925544	0.813072	2.22e-12
	cg25642069	TOP1MT	NM_052963	-0.371806	0.00926648	0.943089	1.25e-23
	cg26184474	KIF2A;KIF2A	NM_001098511;NM_004520	-0.371773	0.00927322	0.928305	2.16e-21
	cg20761853	TIMP2	NM_003255	-0.371751	0.00927762	0.829355	3.28e-13
	cg21067963	CARS2	NM_024537	-0.371557	0.00931747	0.875373	4.01e-16
	cg09358725	LMO2	NM_005574	-0.371466	0.00933598	0.940642	3.21e-23
	cg00384553			-0.371458	0.00933773	0.826506	4.65e-13
	cg20760057	ARHGAP18	NM_033515	-0.371317	0.00936674	0.890121	2.61e-17
	cg27342333	POR	NM_000941	-0.371224	0.00938576	0.902672	1.84e-18
	cg21779301	SCRN1;SCRN1;SCRN1;SCRN1	NM_014766;NM_001145513;NM_001145514;NM_001145515	-0.370853	0.0094625	0.851027	1.85e-14
	cg20107506			-0.370749	0.00948417	0.91596	7.29e-20
	cg13521620	YPEL2	NM_001005404	-0.370492	0.00953786	0.866035	1.9e-15
	cg05157600	PRDM15;PRDM15	NM_022115;NM_001040424	-0.370467	0.00954292	0.931713	7.31e-22
	cg23166590			-0.370258	0.00958689	0.866106	1.88e-15
	cg16928487	SREBF1;SREBF1	NM_001005291;NM_004176	-0.37009	0.00962204	0.939427	5.05e-23
	cg02844899	TTC7A	NM_020458	-0.369755	0.00969302	0.921308	1.7e-20
	cg09803321	NT5C2;NT5C2	NM_001134373;NM_012229	-0.36969	0.0097068	0.836714	1.3e-13
	cg26333564			-0.369635	0.00971834	0.910738	2.75e-19
	cg03812837	PARD6B	NM_032521	-0.369557	0.00973495	0.878524	2.31e-16
	cg16452651	ITSN1;ITSN1	NM_003024;NM_001001132	-0.369427	0.00976276	0.937793	9.15e-23
	cg07458272	KIAA0355	NM_014686	-0.369201	0.00981099	0.873891	5.18e-16
	cg01581098	SYPL1	NM_006754	-0.369187	0.00981391	0.879328	2e-16
	cg07376232	AMICA1;AMICA1	NM_001098526;NM_153206	-0.369149	0.00982206	0.826659	4.57e-13
	cg01057573	TNFAIP8	NM_001077654	-0.369069	0.00983938	0.913273	1.46e-19
	cg18613324	RBM9;RBM9;RBM9;RBM9;RBM9;RBM9	NM_001082578;NM_001082579;NM_001082576;NM_001031695;NM_014309;NM_001082577	-0.369048	0.00984388	0.851436	1.74e-14
	cg08594651			-0.369	0.00985405	0.870144	9.74e-16
	cg13033086	TCF12;TCF12;TCF12;TCF12	NM_003205;NM_207037;NM_207036;NM_207038	-0.368894	0.009877	0.929046	1.71e-21
	cg17464820	SIK3	NM_025164	-0.368708	0.00991716	0.917487	4.86e-20
	cg17785202			-0.368683	0.00992252	0.868276	1.32e-15
	cg22894805	MGA;MGA;MIR626	NM_001080541;NM_001164273;NR_030356	-0.368598	0.00994084	0.916923	5.65e-20
	cg25389087	MBP;MBP	NM_001025101;NM_001025100	-0.368568	0.0099473	0.885221	6.74e-17
	cg17848797	UBE2J2;UBE2J2;LOC100128842;UBE2J2;UBE2J2	NM_194457;NM_194315;NR_027361;NM_194458;NM_058167	-0.368301	0.0100055	0.915686	7.83e-20
	cg16498504			-0.36807	0.0100558	0.90794	5.43e-19
	cg13630493	CLTA;CLTA;CLTA	NM_007096;NM_001833;NM_001076677	-0.36801	0.0100689	0.871814	7.37e-16
	cg25113360	GRIK4	NM_014619	-0.36793	0.0100865	0.818142	1.25e-12
	cg10168457	MAFG;MAFG	NM_032711;NM_002359	-0.367896	0.010094	0.810697	2.88e-12
	cg02347002	SLC23A1;SLC23A1	NM_152685;NM_005847	-0.367896	0.0100941	0.912093	1.97e-19
	cg05961212	ADPRH	NM_001125	-0.36783	0.0101085	0.872644	6.4e-16
	cg00175838	DDAH2	NM_013974	-0.367745	0.0101272	0.852202	1.56e-14
	cg17023856	PRKCZ;PRKCZ;PRKCZ	NM_001033582;NM_002744;NM_001033581	-0.367622	0.0101543	0.957677	1.61e-26
	cg23684449	GPT2;GPT2;GPT2	NM_133443;NM_001142466;NM_001142466	-0.367587	0.0101621	0.892408	1.65e-17
	cg16814786	NCOA4;NCOA4;NCOA4;NCOA4;NCOA4	NM_005437;NM_001145263;NM_001145261;NM_001145262;NM_001145260	-0.367436	0.0101955	0.893449	1.34e-17
	cg18947209			-0.367379	0.0102081	0.89734	5.92e-18
	cg13059136	SNORA54;NAP1L4	NR_002982;NM_005969	-0.367173	0.0102538	0.925909	4.48e-21
	cg26732720	NRXN2;NRXN2;NRXN2	NM_138734;NM_138732;NM_015080	-0.367107	0.0102684	0.895059	9.58e-18
	cg17681750	MACROD1	NM_014067	-0.367079	0.0102748	0.829577	3.2e-13
	cg11916609	IL1RL1	NM_016232	-0.367007	0.0102908	0.925237	5.48e-21
	cg07176064	HMGXB4;HMGXB4	NR_027780;NM_001003681	-0.36693	0.0103079	0.86948	1.09e-15
	cg07158065			-0.366826	0.0103313	0.818567	1.19e-12
	cg08908247	YIF1A	NM_020470	-0.366503	0.0104038	0.943306	1.15e-23
	cg03382501	TXNDC11	NM_015914	-0.366325	0.010444	0.875657	3.82e-16
	cg11922563			-0.366226	0.0104663	0.908294	4.99e-19
	cg04206417	EMID1	NM_133455	-0.366137	0.0104865	0.802881	6.68e-12
	cg14851700	GLUL;GLUL	NM_001033044;NM_002065	-0.366054	0.0105053	0.859758	5.09e-15
	cg13460556	ABHD2;ABHD2	NM_152924;NM_007011	-0.365788	0.010566	0.926704	3.53e-21
	cg21991396	NLRP3;NLRP3;NLRP3;NLRP3;NLRP3;NLRP3;NLRP3;NLRP3	NM_001127462;NM_001079821;NM_183395;NM_183395;NM_004895;NM_004895;NM_001127461;NM_001127462	-0.365666	0.0105938	0.93711	1.17e-22
	cg15428453	TMEM55A	NM_018710	-0.365621	0.0106041	0.912423	1.81e-19
	cg03155200	KCNQ1;KCNQ1	NM_000218;NM_181798	-0.36557	0.0106158	0.847633	2.99e-14
	cg20117260	ATP5SL;ATP5SL;ATP5SL;ATP5SL;ATP5SL;ATP5SL;ATP5SL	NM_018035;NM_001167868;NM_001167870;NM_001167871;NR_030765;NM_001167869;NM_001167867	-0.365519	0.0106276	0.94273	1.44e-23
	cg16409012			-0.365423	0.0106497	0.83366	1.92e-13
	cg14654385	FERMT3;FERMT3	NM_031471;NM_178443	-0.365159	0.0107104	0.902174	2.06e-18
	cg17477806	SEMA6B	NM_032108	-0.365136	0.0107157	0.855378	9.82e-15
	cg06376161			-0.365125	0.0107184	0.8729	6.13e-16
	cg26562772	DUSP10;DUSP10;DUSP10	NM_144728;NM_007207;NM_144729	-0.365123	0.0107188	0.869423	1.1e-15
	cg13359689	CCDC88A;CCDC88A	NM_001135597;NM_018084	-0.36512	0.0107195	0.922329	1.28e-20
	cg26430305	C4BPA	NM_000715	-0.365112	0.0107214	0.902143	2.08e-18
	cg14817906	CNNM4	NM_020184	-0.365056	0.0107343	0.854552	1.11e-14
	cg21762728	C6orf70	NM_018341	-0.364969	0.0107545	0.897874	5.29e-18
	cg24768050	LOC401127	NR_026854	-0.364958	0.0107568	0.840299	8.1e-14
	cg05651511	RPTOR;RPTOR	NM_001163034;NM_020761	-0.364854	0.0107811	0.857459	7.2e-15
	cg03794617	RPTOR;RPTOR	NM_001163034;NM_020761	-0.364837	0.0107851	0.939908	4.22e-23
	cg17490196			-0.364806	0.0107923	0.916046	7.13e-20
	cg13716619	NEU1	NM_000434	-0.364686	0.0108202	0.80759	4.04e-12
	cg27576259	ATP6V0C	NM_001694	-0.364579	0.010845	0.913337	1.44e-19
	cg25784219	FOSL2	NM_005253	-0.364555	0.0108507	0.891916	1.82e-17
	cg01975510	KDM2A;KDM2A	NR_027473;NM_012308	-0.364505	0.0108623	0.82069	9.29e-13
	cg04586023	HDAC10;HDAC10	NM_001159286;NM_032019	-0.364463	0.0108724	0.831361	2.56e-13
	cg23353000	LSM12	NM_152344	-0.3642	0.010934	0.915932	7.34e-20
	cg09359351	HSPBAP1	NM_024610	-0.364133	0.0109498	0.925836	4.58e-21
	cg10062919	RARA;RARA;RARA;RARA	NM_001145301;NM_000964;NM_001024809;NM_001145302	-0.363851	0.0110163	0.851931	1.62e-14
	cg23689615	LOXL1	NM_005576	-0.363532	0.0110919	0.934944	2.48e-22
	cg20962292	PSMB9;PSMB9	NM_002800;NM_148954	-0.363416	0.0111197	0.856205	8.69e-15
	cg04999421	PGS1	NM_024419	-0.36323	0.0111641	0.865662	2.02e-15
	cg27171835	GPBP1L1	NM_021639	-0.363214	0.0111679	0.820154	9.89e-13
	cg13186830			-0.363095	0.0111964	0.850191	2.08e-14
	cg13480197			-0.362996	0.0112202	0.954248	9.32e-26
	cg13682345	LRRC8C	NM_032270	-0.362813	0.0112643	0.877561	2.74e-16
	cg20283107	FAM91A1	NM_144963	-0.362747	0.0112802	0.832762	2.15e-13
	cg26841425	MARCH8;MARCH8;MARCH8	NM_001002265;NM_145021;NM_001002266	-0.362503	0.0113393	0.925781	4.66e-21
	cg13911707	ZNF496	NM_032752	-0.362488	0.0113429	0.865244	2.16e-15
	cg03997145			-0.362361	0.0113737	0.86266	3.25e-15
	cg20718319	NLGN2	NM_020795	-0.36221	0.0114106	0.861218	4.06e-15
	cg14156905			-0.361866	0.0114948	0.917506	4.84e-20
	cg13221924	KIAA0753	NM_014804	-0.361832	0.011503	0.940864	2.95e-23
	cg20748065	POR	NM_000941	-0.361614	0.0115567	0.863883	2.68e-15
	cg11739399	IKBKE	NM_014002	-0.361509	0.0115828	0.876365	3.38e-16
	cg17864487	LRRFIP1;LRRFIP1;LRRFIP1;LRRFIP1;LRRFIP1	NM_001137553;NM_004735;NM_001137550;NM_001137552;NM_001137551	-0.361371	0.0116167	0.869296	1.12e-15
	cg17494897	TSSC1	NM_003310	-0.36124	0.0116494	0.88552	6.37e-17
	cg08952844			-0.36107	0.0116914	0.943049	1.27e-23
	cg27055685	PFDN6;WDR46;WDR46	NM_014260;NM_001164267;NM_005452	-0.361055	0.0116952	0.873055	5.97e-16
	cg13084677	LOC401127	NR_026854	-0.361014	0.0117054	0.888502	3.59e-17
	cg26833883	FLAD1;LENEP;FLAD1	NM_025207;NM_018655;NM_201398	-0.360996	0.0117099	0.840918	7.46e-14
	cg03452895	GCA	NM_012198	-0.36094	0.011724	0.916466	6.38e-20
	cg05727149	CFDP1	NM_006324	-0.360838	0.0117493	0.849433	2.32e-14
	cg01564818	SETD5	NM_001080517	-0.360834	0.0117504	0.931332	8.27e-22
	cg02098619	RERE;RERE	NM_012102;NM_001042681	-0.360778	0.0117644	0.887447	4.41e-17
	cg19023589	TMCO3	NM_017905	-0.360755	0.0117702	0.923506	9.09e-21
	cg01799602	PIGS	NM_033198	-0.360592	0.011811	0.869526	1.08e-15
	cg12948771	LTB4R;LTB4R	NM_001143919;NM_181657	-0.360507	0.0118325	0.923094	1.02e-20
	cg25133130	MAP3K6	NM_004672	-0.360468	0.0118422	0.929554	1.46e-21
	cg03461851	C2CD4B	NM_001007595	-0.360211	0.0119071	0.867636	1.47e-15
	cg19627006	CAPG;CAPG	NM_001747;NM_001747	-0.360159	0.0119203	0.801355	7.84e-12
	cg06178887	POU2F2	NM_002698	-0.360069	0.0119431	0.923113	1.02e-20
	cg25059899	BCL2	NM_000633	-0.359925	0.0119798	0.882402	1.14e-16
	cg03162410	TECR	NM_138501	-0.359652	0.0120493	0.920763	1.98e-20
	cg02935494	C14orf169;HEATR4	NM_024644;NM_203309	-0.359642	0.0120518	0.828307	3.74e-13
	cg04561005	KSR1	NM_014238	-0.359421	0.0121084	0.823563	6.62e-13
	cg11831182	LMNA;LMNA;LMNA	NM_005572;NM_170707;NM_170708	-0.359338	0.0121299	0.810118	3.07e-12
	cg10710218	ACOT11;ACOT11	NM_147161;NM_015547	-0.359201	0.0121651	0.923755	8.46e-21
	cg08267629	PIP5K1C	NM_012398	-0.35904	0.0122065	0.803447	6.29e-12
	cg12617549			-0.359037	0.0122074	0.821828	8.13e-13
	cg22644321	TRIB1	NM_025195	-0.359023	0.0122109	0.801087	8.06e-12
	cg09417547			-0.359017	0.0122125	0.937442	1.04e-22
	cg19223064			-0.358825	0.0122623	0.845207	4.18e-14
	cg16850690	PLXND1	NM_015103	-0.358784	0.0122729	0.927126	3.1e-21
	cg07866632	CCDC101	NM_138414	-0.358745	0.0122831	0.891	2.19e-17
	cg09163720	INPP5A	NM_005539	-0.358298	0.0123997	0.910361	3.02e-19
	cg12376829	MAD1L1;MAD1L1;MAD1L1	NM_003550;NM_001013837;NM_001013836	-0.358244	0.0124138	0.911213	2.45e-19
	cg25577489	ZBTB16;ZBTB16	NM_006006;NM_001018011	-0.358143	0.0124404	0.895885	8.06e-18
	cg00899659	C10orf25;ZNF22	NM_001039380;NM_006963	-0.358073	0.0124588	0.884899	7.17e-17
	cg01827726	TTYH3	NM_025250	-0.357934	0.0124953	0.818498	1.2e-12
	cg16100392	TAAR3	NR_028511	-0.357805	0.0125293	0.841352	7.04e-14
	cg27087781	YPEL3;YPEL3	NM_031477;NM_001145524	-0.357761	0.012541	0.942469	1.59e-23
	cg18169971	H2AFY;H2AFY;H2AFY;H2AFY	NM_004893;NM_001040158;NM_138610;NM_138609	-0.357527	0.0126029	0.900574	2.94e-18
	cg25006077	MBNL1;MBNL1;MBNL1;MBNL1;MBNL1;MBNL1;MBNL1	NM_207295;NM_207293;NM_021038;NM_207292;NM_207296;NM_207297;NM_207294	-0.35749	0.0126128	0.932083	6.48e-22
	cg22094071	FAM82B	NM_016033	-0.357442	0.0126256	0.931411	8.06e-22
	cg03154580	RALB	NM_002881	-0.357287	0.0126668	0.907907	5.47e-19
	cg01574390	METTL9;METTL9	NM_001077180;NM_016025	-0.357087	0.0127203	0.924633	6.54e-21
	cg22315974	NFIC;NFIC	NM_005597;NM_205843	-0.357038	0.0127335	0.824026	6.27e-13
	cg09322555	PSMB9;PSMB9	NM_002800;NM_148954	-0.357035	0.0127344	0.94043	3.48e-23
	cg16303353	CACNA1C;CACNA1C;CACNA1C;CACNA1C;CACNA1C;CACNA1C;CACNA1C;CACNA1C;CACNA1C;CACNA1C;CACNA1C;CACNA1C;CACNA1C;CACNA1C;CACNA1C;CACNA1C;CACNA1C;CACNA1C;CACNA1C;CACNA1C;CACNA1C;CACNA1C;CACNA1C	NM_001129844;NM_001129827;NM_001129839;NM_001129834;NM_001129841;NM_000719;NM_001129830;NM_001167625;NM_001129843;NM_001167624;NM_001129835;NM_001129837;NM_001167623;NM_001129840;NM_199460;NM_001129833;NM_001129832;NM_001129829;NM_001129846;NM_001129836;NM_001129838;NM_001129831;NM_001129842	-0.357033	0.0127348	0.947775	1.82e-24
	cg10821261			-0.356895	0.0127717	0.893427	1.34e-17
	cg26528311	FHL3	NM_004468	-0.356834	0.0127883	0.836475	1.34e-13
	cg01565508	PIK3R5	NM_001142633	-0.35682	0.0127919	0.922752	1.13e-20
	cg11530995	CALML4;CALML4;CALML4;CALML4	NM_033429;NM_033429;NM_001031733;NM_001031733	-0.356716	0.01282	0.913002	1.56e-19
	cg16396191	KIAA0564	NM_015058	-0.356617	0.0128467	0.912113	1.96e-19
	cg09029192	TNRC6C;TNRC6C	NM_018996;NM_001142640	-0.356603	0.0128504	0.907697	5.76e-19
	cg23232188	EAF2	NM_018456	-0.356579	0.012857	0.90925	3.96e-19
	cg21964466			-0.356567	0.0128602	0.922304	1.28e-20
	cg07268332	AMPD3;AMPD3;AMPD3	NM_001025389;NM_001025390;NM_000480	-0.356559	0.0128623	0.944402	7.42e-24
	cg11478024	ANKS1A	NM_015245	-0.356481	0.0128833	0.893009	1.46e-17
	cg02543993	RNF216;RNF216	NM_207111;NM_207116	-0.355576	0.0131303	0.824578	5.87e-13
	cg17833106	PVRL4	NM_030916	-0.355536	0.0131413	0.941547	2.28e-23
	cg02769705	TMEM183B;TMEM183A	NM_001079809;NM_138391	-0.35553	0.0131432	0.916524	6.28e-20
	cg18067134	FOXP1	NM_032682	-0.355427	0.0131715	0.835788	1.46e-13
	cg15632862	FHL3	NM_004468	-0.355376	0.0131855	0.853236	1.34e-14
	cg23990557	IGF1R	NM_000875	-0.355373	0.0131863	0.877016	3.01e-16
	cg01551258	RHOT1;ARGFXP2;RHOT1;RHOT1	NM_001033568;NR_002222;NM_018307;NM_001033566	-0.355078	0.0132681	0.926151	4.17e-21
	cg06719445	FOXN3	NM_001085471	-0.354989	0.0132926	0.901904	2.19e-18
	cg16776035			-0.354788	0.0133486	0.908372	4.9e-19
	cg12612122	NECAP1;NECAP1	NR_024260;NM_015509	-0.354659	0.0133847	0.848252	2.74e-14
	cg06760238	INPP5A	NM_005539	-0.354128	0.0135338	0.894635	1.05e-17
	cg11297046	HRC	NM_002152	-0.35393	0.01359	0.854565	1.11e-14
	cg26862175	STAB1	NM_015136	-0.353918	0.0135934	0.940904	2.91e-23
	cg15921911			-0.35383	0.0136183	0.886923	4.87e-17
	cg26638570	BAHCC1	NM_001080519	-0.353828	0.0136187	0.883422	9.45e-17
	cg12646786			-0.353814	0.0136228	0.870248	9.57e-16
	cg24403649			-0.353745	0.0136424	0.918893	3.32e-20
	cg09540612	C20orf135	NM_080622	-0.353699	0.0136555	0.84836	2.7e-14
	cg00469800	TOR1A	NM_000113	-0.353571	0.0136919	0.917123	5.36e-20
	cg12721068	HHIPL2	NM_024746	-0.35352	0.0137065	0.932432	5.78e-22
	cg00796963	KIAA1009	NM_014895	-0.353451	0.0137261	0.916374	6.54e-20
	cg01610123			-0.35333	0.0137607	0.860219	4.74e-15
	cg09684429	ROBO4	NM_019055	-0.353312	0.013766	0.862367	3.4e-15
	cg19635401	C6orf204;PLN;C6orf204	NM_206921;NM_002667;NM_001042475	-0.353287	0.0137732	0.902229	2.04e-18
	cg11231701	CDK5RAP1;CDK5RAP1	NM_016082;NM_016408	-0.353218	0.0137928	0.918352	3.85e-20
	cg20281375			-0.353144	0.0138141	0.89638	7.26e-18
	cg11952493	MPP7	NM_173496	-0.352914	0.0138805	0.881492	1.35e-16
	cg22152931	PRKRIP1	NM_024653	-0.35287	0.0138932	0.856819	7.93e-15
	cg03123320			-0.352855	0.0138975	0.927269	2.97e-21
	cg15407162	ZNF193	NM_006299	-0.352587	0.013975	0.895053	9.59e-18
	cg11435167	MBD3	NM_003926	-0.352171	0.0140962	0.839956	8.48e-14
	cg25444339	HIP1	NM_005338	-0.352036	0.0141356	0.940009	4.07e-23
	cg14191024			-0.352028	0.0141379	0.929324	1.57e-21
	cg12729838	CLU;CLU;CLU;CLU	NM_001171138;NM_001831;NM_001171138;NM_203339	-0.351979	0.0141522	0.89429	1.12e-17
	cg24561419			-0.351926	0.0141677	0.817367	1.36e-12
	cg02839351	HDGF2;HDGF2	NM_032631;NM_001001520	-0.351686	0.0142384	0.918308	3.9e-20
	cg00719771			-0.351514	0.0142893	0.925576	4.95e-21
	cg18926797	DCAF5	NM_003861	-0.351464	0.0143041	0.912586	1.74e-19
	cg05533539	MAPT;MAPT;MAPT;MAPT;MAPT;MAPT	NM_001123066;NM_016835;NM_005910;NM_001123067;NM_016834;NM_016841	-0.351393	0.014325	0.938131	8.1e-23
	cg26833538	ALDH3B1;ALDH3B1;ALDH3B1	NM_001030010;NM_000694;NM_001161473	-0.351334	0.0143426	0.822833	7.22e-13
	cg09122223	IL18	NM_001562	-0.351285	0.014357	0.838394	1.04e-13
	cg15836722	IL1B	NM_000576	-0.351104	0.014411	0.868096	1.36e-15
	cg07239938	ELANE	NM_001972	-0.350995	0.0144435	0.89873	4.4e-18
	cg14575356	ARHGAP18	NM_033515	-0.350973	0.01445	0.935882	1.8e-22
	cg06418238	RPTOR;RPTOR	NM_001163034;NM_020761	-0.35097	0.0144509	0.841128	7.26e-14
	cg14016236	FNDC3B;FNDC3B	NM_022763;NM_001135095	-0.350866	0.0144821	0.918947	3.28e-20
	cg17222829	SHANK2;SHANK2	NM_012309;NM_133266	-0.350712	0.0145281	0.828427	3.68e-13
	cg16734549	ARHGAP27	NM_199282	-0.350565	0.0145723	0.909915	3.37e-19
	cg12812662	DUSP3;C17orf105	NM_004090;NM_001136483	-0.350507	0.0145895	0.937095	1.17e-22
	cg13745870	SPATA12;ARHGEF3;SPATA12	NM_181727;NM_001128615;NM_181727	-0.350506	0.0145899	0.811493	2.64e-12
	cg11094248	RARA;RARA;RARA	NM_001145301;NM_000964;NM_001145302	-0.350379	0.0146283	0.8111	2.76e-12
	cg21073459	OSCAR;OSCAR;OSCAR;OSCAR;OSCAR;OSCAR;OSCAR;OSCAR	NM_133168;NM_206818;NM_133169;NM_130771;NM_133169;NM_130771;NM_133168;NM_206818	-0.350191	0.0146851	0.823016	7.07e-13
	cg02639080	TRIM27	NM_006510	-0.350152	0.0146967	0.861142	4.11e-15
	cg17228105	ERG;ERG;ERG;ERG	NM_004449;NM_182918;NM_001136155;NM_001136154	-0.34956	0.014877	0.926058	4.28e-21
	cg09978734	PRPSAP1	NM_002766	-0.349531	0.014886	0.906191	8.21e-19
	cg25070639	VAT1	NM_006373	-0.349499	0.0148958	0.947776	1.82e-24
	cg24804707	TG;SLA;SLA	NM_003235;NM_001045557;NM_001045556	-0.349412	0.0149225	0.805796	4.9e-12
	cg02221520	TLR6	NM_006068	-0.349357	0.0149392	0.82926	3.32e-13
	cg04504205	ZMYND8;LOC100131496;ZMYND8;ZMYND8	NM_183048;NR_024594;NM_183047;NM_012408	-0.349291	0.0149597	0.848474	2.65e-14
	cg16392942	SPIRE2	NM_032451	-0.349288	0.0149604	0.92983	1.34e-21
	cg04552852	TSPAN4;TSPAN4;TSPAN4;TSPAN4;TSPAN4;TSPAN4;TSPAN4	NM_001025237;NM_001025236;NM_001025239;NM_001025238;NM_001025235;NM_003271;NM_001025234	-0.349264	0.0149679	0.880924	1.5e-16
	cg02832357	STAT5B	NM_012448	-0.349082	0.0150239	0.931879	6.93e-22
	cg22855020	SLC20A2	NM_006749	-0.349063	0.0150297	0.885173	6.8e-17
	cg13229972			-0.34901	0.0150462	0.934981	2.45e-22
	cg20284239	GPR161	NM_153832	-0.348732	0.0151321	0.882551	1.11e-16
	cg03597491	ZBTB16;ZBTB16	NM_006006;NM_001018011	-0.34868	0.0151485	0.862559	3.3e-15
	cg21685770	OLR1	NM_002543	-0.348664	0.0151534	0.930295	1.16e-21
	cg11184109	RFT1	NM_052859	-0.348541	0.0151917	0.821758	8.2e-13
	cg02913553	KBTBD11	NM_014867	-0.348276	0.0152743	0.858154	6.49e-15
	cg02254056	TXNDC5;TXNDC5	NM_030810;NM_001145549	-0.347991	0.0153639	0.841437	6.96e-14
	cg14118850	HPCAL1;HPCAL1	NM_002149;NM_134421	-0.347912	0.0153888	0.921975	1.41e-20
	cg08195176	SIK3	NM_025164	-0.347715	0.0154509	0.901832	2.23e-18
	cg23715728	MICA	NM_000247	-0.347598	0.0154879	0.803465	6.28e-12
	cg22799850	ARMC10;FBXL13;ARMC10;FBXL13;ARMC10;ARMC10;ARMC10;FBXL13;ARMC10	NM_001161010;NM_145032;NM_001161011;NM_145032;NM_001161013;NM_001161012;NM_031905;NM_001111038;NM_001161009	-0.347436	0.0155392	0.85143	1.74e-14
	cg00357971	COL20A1	NM_020882	-0.347343	0.0155688	0.902214	2.04e-18
	cg21932452	NOS3	NM_000603	-0.347287	0.0155866	0.90899	4.22e-19
	cg05251269	SLC9A3R2;SLC9A3R2	NM_001130012;NM_004785	-0.347254	0.0155971	0.926741	3.49e-21
	cg11849798	ZNF706;ZNF706;ZNF706	NM_001042510;NM_001042511;NM_016096	-0.347232	0.0156042	0.830833	2.73e-13
	cg21203569	NR1H3;NR1H3;NR1H3	NM_001130101;NM_005693;NM_001130102	-0.34677	0.0157521	0.824297	6.07e-13
	cg08472633	GALNS	NM_000512	-0.34673	0.0157647	0.936161	1.63e-22
	cg07243366			-0.346702	0.0157737	0.890601	2.37e-17
	cg06330618	FES;FES;FES;FES	NM_001143783;NM_001143784;NM_001143785;NM_002005	-0.346657	0.0157883	0.912543	1.76e-19
	cg01753788	PLEC1;PLEC1;PLEC1;PLEC1;PLEC1	NM_201380;NM_000445;NM_201380;NM_201378;NM_201379	-0.34649	0.0158421	0.823376	6.77e-13
	cg24621362	LTBR	NM_002342	-0.346458	0.0158523	0.877784	2.63e-16
	cg04193923	CSF3;CSF3;CSF3	NM_172220;NM_000759;NM_172219	-0.346277	0.0159112	0.868537	1.27e-15
	cg16267322	SLC24A4;SLC24A4;SLC24A4	NM_153647;NM_153648;NM_153646	-0.346119	0.0159623	0.869862	1.02e-15
	cg18361395			-0.345971	0.0160105	0.844991	4.3e-14
	cg27516100	DHX16;DHX16	NM_001164239;NM_003587	-0.345805	0.0160647	0.938843	6.25e-23
	cg14006905			-0.345798	0.0160669	0.808222	3.78e-12
	cg10338518	AFF1	NM_001166693	-0.345611	0.0161282	0.933381	4.22e-22
	cg15331705			-0.34553	0.0161547	0.859519	5.27e-15
	cg24760467	LZTS2	NM_032429	-0.345454	0.0161795	0.92666	3.57e-21
	cg14324675	LST1;LST1;LST1;LST1;LST1;LST1;LST1;LST1	NR_029461;NM_007161;NM_205839;NM_205838;NM_205840;NM_001166538;NR_029462;NM_205837	-0.345327	0.0162215	0.848241	2.74e-14
	cg10559803	RALGPS2	NM_152663	-0.345098	0.016297	0.833308	2e-13
	cg03290827	SEC14L1;SEC14L1;SEC14L1;SEC14L1;SEC14L1	NM_001143999;NM_003003;NM_001144001;NM_001143998;NM_001039573	-0.34506	0.0163097	0.869353	1.11e-15
	cg11505048	RGL1;APOBEC4	NM_015149;NM_203454	-0.344722	0.0164216	0.887222	4.6e-17
	cg14349937	RNLS;RNLS	NM_001031709;NM_018363	-0.344709	0.0164261	0.882022	1.22e-16
	cg00308914			-0.344606	0.0164605	0.843389	5.35e-14
	cg18835596	MYB;MYB;MYB;MYB;MYB;MYB;MYB;MYB	NM_001161660;NM_005375;NM_001161656;NM_001161659;NM_001130172;NM_001161657;NM_001161658;NM_001130173	-0.344425	0.0165207	0.936705	1.35e-22
	cg18893596			-0.3444	0.0165291	0.905067	1.07e-18
	cg23018689	DARC	NM_002036	-0.344291	0.0165659	0.879498	1.94e-16
	cg21341487	GTPBP5	NM_015666	-0.344187	0.0166005	0.940574	3.29e-23
	cg18342964	C6orf114;GFOD1	NM_033069;NM_018988	-0.344179	0.0166032	0.834095	1.81e-13
	cg17789193			-0.344032	0.0166527	0.850923	1.88e-14
	cg05492071			-0.343961	0.0166767	0.825036	5.55e-13
	cg22526531	KIAA0319L	NM_024874	-0.343959	0.0166775	0.901798	2.24e-18
	cg17679427	CREM;CREM;CREM;CREM;CREM;CREM;CREM;CREM;CREM;CREM;CREM	NM_182769;NM_182770;NM_182853;NM_183011;NM_183013;NM_182772;NM_183060;NM_181571;NM_182850;NM_183012;NM_182771	-0.343934	0.0166856	0.917974	4.26e-20
	cg23254538	NCR3;NCR3	NM_001145466;NM_147130	-0.343722	0.0167575	0.913739	1.3e-19
	cg12061649			-0.343671	0.0167749	0.805056	5.31e-12
	cg27597392			-0.343634	0.0167872	0.883218	9.82e-17
	cg09714919			-0.343619	0.0167923	0.869853	1.02e-15
	cg23416081	FKBP5	NM_001145775	-0.343554	0.0168145	0.936004	1.72e-22
	cg15961455			-0.34323	0.0169247	0.939136	5.62e-23
	cg19060895	NLRP1;NLRP1;NLRP1;NLRP1;NLRP1	NM_014922;NM_001033053;NM_033006;NM_033007;NM_033004	-0.343218	0.0169287	0.936408	1.5e-22
	cg15616998	MFSD2A;MFSD2A	NM_001136493;NM_032793	-0.343075	0.0169778	0.803183	6.47e-12
	cg07577997	C1orf161	NM_152367	-0.342966	0.017015	0.851684	1.68e-14
	cg22074114	KY	NM_178554	-0.342874	0.0170468	0.944357	7.55e-24
	cg12157761	UACA	NM_018003	-0.342115	0.017309	0.93548	2.07e-22
	cg22950899	PTPRS;PTPRS;PTPRS;PTPRS	NM_130855;NM_002850;NM_130854;NM_130853	-0.342088	0.0173184	0.804731	5.49e-12
	cg23756272	BCL2	NM_000633	-0.342088	0.0173186	0.890511	2.42e-17
	cg22467534	UNC13D	NM_199242	-0.341965	0.0173613	0.889456	2.98e-17
	cg09147065	C8orf55	NM_016647	-0.341936	0.0173715	0.882105	1.21e-16
	cg06776976	TMEM206	NM_018252	-0.341902	0.0173834	0.86513	2.2e-15
	cg16348358	LCK	NM_005356	-0.341854	0.0174002	0.92852	2.02e-21
	cg04476070	ZC3H18	NM_144604	-0.341529	0.017514	0.842557	5.99e-14
	cg04172533	NOD2	NM_022162	-0.341476	0.0175327	0.889117	3.18e-17
	cg26943189	NQO2	NM_000904	-0.341432	0.0175482	0.89898	4.17e-18
	cg20773479	CEP72	NM_018140	-0.341424	0.0175509	0.873982	5.1e-16
	cg23386659	PRTN3	NM_002777	-0.34116	0.0176442	0.824661	5.81e-13
	cg00044466			-0.34097	0.0177116	0.870459	9.24e-16
	cg01472113	UGCG	NM_003358	-0.340793	0.0177745	0.892861	1.51e-17
	cg20176098			-0.340738	0.017794	0.883482	9.35e-17
	cg11557929	ATRIP;ATRIP	NM_130384;NM_032166	-0.340723	0.0177994	0.834331	1.76e-13
	cg21005412	WDR43;SNORD53	NM_015131;NR_002741	-0.340401	0.0179146	0.934196	3.2e-22
	cg03764364			-0.340379	0.0179222	0.828371	3.71e-13
	cg02938045	ABCC11;ABCC11;ABCC11	NM_145186;NM_032583;NM_033151	-0.34026	0.0179651	0.916601	6.16e-20
	cg11377213	FRMD4B	NM_015123	-0.340121	0.018015	0.904372	1.25e-18
	cg19724567	IFRD1	NM_001007245	-0.339877	0.0181031	0.857586	7.07e-15
	cg01465769	PRKCD;PRKCD	NM_212539;NM_006254	-0.3391	0.0183859	0.913217	1.48e-19
	cg04213390			-0.338977	0.0184311	0.933018	4.76e-22
	cg09251317			-0.338496	0.0186083	0.858853	5.84e-15
	cg01281601	MYH11;MYH11;MYH11;MYH11	NM_022844;NM_002474;NM_001040114;NM_001040113	-0.338305	0.0186791	0.941657	2.18e-23
	cg04901835	SLC2A5;SLC2A5;SLC2A5	NM_003039;NM_001135585;NR_024180	-0.338227	0.0187078	0.866552	1.75e-15
	cg27616007	LST1;LST1;LST1;LST1;LST1;LST1;LST1;LST1	NR_029461;NM_007161;NM_205839;NM_205838;NM_205840;NM_001166538;NR_029462;NM_205837	-0.338215	0.0187125	0.808123	3.82e-12
	cg13246468	LAPTM5	NM_006762	-0.338143	0.0187391	0.87555	3.89e-16
	cg12787553	CTSZ	NM_001336	-0.338	0.0187925	0.85623	8.65e-15
	cg09657256	G6PC3;G6PC3;G6PC3	NR_028582;NR_028581;NM_138387	-0.337913	0.0188251	0.809022	3.46e-12
	cg08795084	DEPDC1B;DEPDC1B	NM_018369;NM_001145208	-0.337889	0.0188341	0.854266	1.16e-14
	cg07743805			-0.337806	0.0188649	0.831633	2.47e-13
	cg10108888			-0.337719	0.0188975	0.810095	3.08e-12
	cg10392172	BATF2	NM_138456	-0.337656	0.0189212	0.801609	7.63e-12
	cg18614510	CERK	NM_022766	-0.337636	0.0189286	0.850175	2.09e-14
	cg25265234	LOC100302640	NR_028303	-0.337367	0.0190298	0.823976	6.31e-13
	cg14295482	GNG7	NM_052847	-0.337117	0.0191246	0.841903	6.54e-14
	cg12209946			-0.337011	0.0191644	0.91941	2.89e-20
	cg21185109			-0.336874	0.0192165	0.848042	2.82e-14
	cg19619003			-0.336535	0.0193459	0.889827	2.77e-17
	cg12796135	DENND4B	NM_014856	-0.336349	0.0194172	0.870959	8.5e-16
	cg14630206	PAK1;PAK1	NM_002576;NM_001128620	-0.335984	0.0195576	0.894674	1.04e-17
	cg07379703	ARSB;ARSB	NM_000046;NM_198709	-0.335911	0.0195857	0.918617	3.58e-20
	cg11343177			-0.335781	0.0196362	0.802413	7.01e-12
	cg09128944			-0.335603	0.019705	0.890911	2.23e-17
	cg27483469	DOPEY2	NM_005128	-0.33554	0.0197296	0.868041	1.38e-15
	cg12676500	SLC39A4;SLC39A4	NM_017767;NM_130849	-0.335478	0.0197539	0.833433	1.97e-13
	cg26133217	DIS3L2	NM_152383	-0.335431	0.0197718	0.866356	1.81e-15
	cg02836325	PGS1	NM_024419	-0.334845	0.0200014	0.918544	3.66e-20
	cg04389994	CCDC109A	NM_138357	-0.334747	0.0200399	0.93061	1.04e-21
	cg05650238			-0.334572	0.020109	0.901814	2.23e-18
	cg21199093	ZMYM4	NM_005095	-0.334479	0.0201459	0.882579	1.11e-16
	cg27627524	ASAP1	NM_018482	-0.334407	0.0201743	0.895316	9.08e-18
	cg24025255	DCAF5	NM_003861	-0.334364	0.0201914	0.915748	7.71e-20
	cg26433561			-0.334172	0.0202675	0.918395	3.81e-20
	cg17657707	ARFGEF2	NM_006420	-0.333902	0.0203753	0.917818	4.45e-20
	cg27200630			-0.333892	0.0203791	0.899857	3.44e-18
	cg10718614			-0.333517	0.0205296	0.917651	4.65e-20
	cg06178179	CA7;CA7	NM_005182;NM_001014435	-0.333101	0.0206974	0.90765	5.82e-19
	cg11193767	LIN54;LIN54;LIN54	NM_001115008;NM_194282;NM_001115007	-0.333054	0.0207162	0.916206	6.83e-20
	cg17318719	TMPRSS4;TMPRSS4	NM_001083947;NM_019894	-0.33287	0.020791	0.803536	6.23e-12
	cg07958192	TIGD2;TIGD2	NM_145715;NM_145715	-0.332841	0.0208027	0.874207	4.91e-16
	cg07297410			-0.332334	0.0210099	0.938425	7.28e-23
	cg19322969	ITPKB	NM_002221	-0.332207	0.0210619	0.851616	1.7e-14
	cg02564313	ABAT	NM_020686	-0.332149	0.0210856	0.906217	8.16e-19
	cg13390284			-0.332102	0.021105	0.913131	1.51e-19
	cg22840216			-0.331829	0.0212175	0.818822	1.15e-12
	cg15814508	P2RY14;MED12L;P2RY14	NM_014879;NM_053002;NM_014879	-0.331787	0.0212349	0.802132	7.22e-12
	cg21382392	ETV3L;ETV3L	NM_001004341;NM_001004341	-0.331756	0.021248	0.9014	2.45e-18
	cg02420027			-0.331649	0.0212922	0.92403	7.81e-21
	cg08082507	GTF2IRD2P	NR_002164	-0.331555	0.0213311	0.870034	9.92e-16
	cg20615117	SORL1	NM_003105	-0.331541	0.021337	0.911723	2.16e-19
	cg01188914	PPM1F	NM_014634	-0.331515	0.0213479	0.884589	7.6e-17
	cg01538969	DHX16;DHX16	NM_001164239;NM_003587	-0.331408	0.0213925	0.925312	5.35e-21
	cg08248297	AP1M1;AP1M1	NM_032493;NM_001130524	-0.331183	0.021486	0.926216	4.09e-21
	cg11826104	UBE3A;UBE3A;UBE3A;UBE3A	NM_000462;NM_130838;NM_130838;NM_130839	-0.330796	0.0216481	0.931356	8.21e-22
	cg21855041	STEAP3;STEAP3;STEAP3	NM_001008410;NM_018234;NM_182915	-0.330732	0.021675	0.910199	3.14e-19
	cg06830981	LDLRAD2	NM_001013693	-0.330568	0.0217445	0.899661	3.59e-18
	cg24979407	TXNDC15	NM_024715	-0.330398	0.0218163	0.812622	2.33e-12
	cg16131053			-0.330359	0.0218328	0.941157	2.64e-23
	cg01719995	USP38	NM_032557	-0.33029	0.0218619	0.867309	1.55e-15
	cg03681335	SULT1C2;SULT1C2	NM_001056;NM_176825	-0.330176	0.0219103	0.942042	1.88e-23
	cg18036081	EMID1	NM_133455	-0.330065	0.0219574	0.939359	5.18e-23
	cg16572910			-0.329999	0.0219856	0.849098	2.43e-14
	cg23334433	AATK	NM_001080395	-0.329979	0.0219942	0.90865	4.58e-19
	cg19913563			-0.329911	0.022023	0.885035	6.98e-17
	cg10133100	SAPS3;SAPS3;SAPS3;SAPS3;SAPS3;SAPS3	NM_001164161;NM_001164163;NM_001164160;NM_001164164;NM_001164162;NM_018312	-0.329882	0.0220355	0.845111	4.23e-14
	cg06867089			-0.329509	0.022195	0.922798	1.12e-20
	cg12120406	KSR1	NM_014238	-0.329496	0.0222009	0.839697	8.77e-14
	cg19502359			-0.329412	0.0222366	0.884891	7.18e-17
	cg12080306	YPEL2	NM_001005404	-0.329343	0.0222667	0.886883	4.91e-17
	cg19055828	DIP2B	NM_173602	-0.32895	0.0224364	0.912288	1.87e-19
	cg27185267	CPNE9	NM_153635	-0.328897	0.0224594	0.834066	1.82e-13
	cg01710158	CDC42EP2	NM_006779	-0.32872	0.022536	0.83435	1.76e-13
	cg01556552			-0.328701	0.0225443	0.917694	4.6e-20
	cg02412123	SIGLEC9;SIGLEC9	NM_014441;NM_014441	-0.328534	0.0226173	0.897563	5.65e-18
	cg00501765	C1orf105	NM_139240	-0.328515	0.0226254	0.933006	4.78e-22
	cg27301230	TPST1	NM_003596	-0.328431	0.0226621	0.89621	7.53e-18
	cg23501051	LOC100126784;NAV2;NAV2;NAV2	NR_015384;NM_182964;NM_001111018;NM_145117	-0.328303	0.0227182	0.854327	1.15e-14
	cg00273737			-0.328281	0.0227277	0.844251	4.76e-14
	cg12450823			-0.328261	0.0227364	0.854005	1.2e-14
	cg14380013	UNC119B	NM_001080533	-0.328133	0.0227927	0.860323	4.66e-15
	cg04703221	WWP2;MIR140;WWP2	NM_199424;NR_029681;NM_007014	-0.328063	0.0228235	0.909582	3.65e-19
	cg00207226	FLJ44606;FLJ44606	NM_001164478;NM_001164479	-0.328059	0.022825	0.890272	2.53e-17
	cg27227507			-0.328026	0.0228397	0.884131	8.28e-17
	cg02573176	SLC10A5	NM_001010893	-0.327998	0.0228517	0.877525	2.75e-16
	cg01327169			-0.327992	0.0228547	0.876865	3.09e-16
	cg01283625			-0.327868	0.0229091	0.84967	2.24e-14
	cg17493398	SH3GLB1	NM_016009	-0.327813	0.0229336	0.85047	2e-14
	cg04578090	PROCA1	NM_152465	-0.327583	0.0230352	0.802151	7.21e-12
	cg19037107	ACAD8	NM_014384	-0.327201	0.0232046	0.935083	2.37e-22
	cg26293423	MRPS27	NM_015084	-0.327108	0.0232465	0.853882	1.22e-14
	cg21640432	FFAR2	NM_005306	-0.326974	0.0233064	0.930676	1.02e-21
	cg00500359	OSBPL5;OSBPL5;OSBPL5	NM_020896;NM_001144063;NM_145638	-0.326885	0.0233459	0.803473	6.28e-12
	cg16741573	GALNT1	NM_020474	-0.326851	0.0233611	0.826938	4.42e-13
	cg04177251			-0.326545	0.0234988	0.903271	1.61e-18
	cg26601496	NFASC;NFASC;NFASC;NFASC	NM_001005388;NM_001160331;NM_015090;NM_001160332	-0.326255	0.0236295	0.835072	1.6e-13
	cg18934187	STARD6	NM_139171	-0.326169	0.0236685	0.910078	3.24e-19
	cg04774822	NADSYN1	NM_018161	-0.326016	0.0237379	0.856058	8.88e-15
	cg13757845	C9orf139;FUT7;FUT7	NM_207511;NM_004479;NM_004479	-0.32599	0.0237499	0.834157	1.8e-13
	cg20829834	ATXN7;ATXN7	NM_000333;NM_001128149	-0.325915	0.023784	0.837399	1.19e-13
	cg04992673	HEPACAM2;HEPACAM2	NM_198151;NM_001039372	-0.325905	0.0237888	0.831894	2.39e-13
	cg17319795	LGMN;LGMN	NM_001008530;NM_005606	-0.325739	0.023864	0.811391	2.67e-12
	cg17099931			-0.325412	0.0240137	0.847837	2.9e-14
	cg13610659	OBFC2B;SLC39A5	NM_024068;NM_173596	-0.325351	0.0240416	0.856606	8.18e-15
	cg24630957	KIAA1033	NM_015275	-0.325208	0.0241078	0.821602	8.35e-13
	cg02357541			-0.324867	0.0242647	0.850126	2.1e-14
	cg18603577	RILPL2	NM_145058	-0.32481	0.0242914	0.806067	4.76e-12
	cg27307183	CDYL;CDYL;CDYL;CDYL	NM_001143970;NM_004824;NR_026590;NM_001143971	-0.324668	0.0243573	0.865464	2.09e-15
	cg15136975	CAPZB	NM_004930	-0.324637	0.0243717	0.823021	7.06e-13
	cg14740860	ZC3H3	NM_015117	-0.324506	0.0244322	0.927776	2.54e-21
	cg24401262			-0.324485	0.0244421	0.931119	8.87e-22
	cg04331601	FAM129C;FAM129C	NM_173544;NM_001098524	-0.324238	0.0245573	0.855465	9.7e-15
	cg05710142	KIAA1522	NM_020888	-0.324217	0.0245674	0.831147	2.63e-13
	cg04967578	C18orf1;C18orf1;C18orf1;C18orf1;C18orf1;C18orf1	NM_001003675;NM_181481;NM_181482;NM_004338;NM_001003674;NM_181483	-0.324134	0.0246059	0.871875	7.29e-16
	cg01129847	C19orf35	NM_198532	-0.324117	0.0246139	0.837447	1.18e-13
	cg22999864			-0.323936	0.0246987	0.808991	3.47e-12
	cg10611016	C11orf42	NM_173525	-0.323849	0.0247399	0.886275	5.52e-17
	cg22231483	LRRN4CL	NM_203422	-0.323808	0.0247589	0.810188	3.05e-12
	cg00665106			-0.323447	0.0249296	0.860813	4.33e-15
	cg19361800	KLF7	NM_003709	-0.323367	0.0249672	0.87975	1.85e-16
	cg16030878	TBC1D16	NM_019020	-0.323352	0.0249743	0.92056	2.1e-20
	cg01517832	TOLLIP;LOC255512	NM_019009;NR_029409	-0.32335	0.0249755	0.870578	9.06e-16
	cg17846016			-0.323293	0.0250024	0.927772	2.55e-21
	cg19420720	P4HB	NM_000918	-0.32329	0.0250036	0.82553	5.23e-13
	cg09786420	ADAR	NM_001025107	-0.323114	0.0250874	0.855183	1.01e-14
	cg03003722	ZFAND3	NM_021943	-0.322718	0.0252765	0.808166	3.8e-12
	cg06230805	AGPAT3;AGPAT3	NM_001037553;NM_020132	-0.322523	0.0253699	0.876045	3.57e-16
	cg11736228	ENTPD7	NM_020354	-0.322494	0.0253841	0.814371	1.92e-12
	cg02065051	ZNF337	NM_015655	-0.322334	0.025461	0.928551	2e-21
	cg15816464	SMG6;SMG6	NM_017575;NM_001170957	-0.322317	0.0254689	0.861051	4.17e-15
	cg24776142	ATXN1;ATXN1	NM_001128164;NM_000332	-0.322304	0.0254751	0.817801	1.3e-12
	cg11911122	NCOA2	NM_006540	-0.322266	0.0254937	0.825836	5.04e-13
	cg11639615			-0.321762	0.0257375	0.848118	2.79e-14
	cg23040424			-0.32173	0.0257534	0.805245	5.2e-12
	cg07141002	H1F0	NM_005318	-0.321636	0.0257988	0.807012	4.3e-12
	cg17828456			-0.321573	0.0258297	0.892743	1.54e-17
	cg00625110	FTO	NM_001080432	-0.321573	0.0258299	0.807032	4.3e-12
	cg19905880	ADRBK1	NM_001619	-0.321556	0.0258383	0.825409	5.31e-13
	cg01275661			-0.32134	0.0259435	0.865679	2.02e-15
	cg13409077	CD72	NM_001782	-0.321059	0.0260812	0.887039	4.77e-17
	cg19348484	FURIN	NM_002569	-0.320726	0.0262456	0.864231	2.54e-15
	cg09942999	MTMR9L	NR_026850	-0.320556	0.0263296	0.883581	9.17e-17
	cg03393889	NTHL1	NM_002528	-0.32042	0.0263968	0.904215	1.3e-18
	cg15382933	CD59;CD59;CD59;CD59;CD59;CD59;CD59;CD59	NM_203330;NM_001127225;NM_203329;NM_001127226;NM_000611;NM_001127223;NM_001127227;NM_203331	-0.32041	0.0264019	0.905621	9.38e-19
	cg08700083	SLAIN2	NM_020846	-0.320061	0.0265756	0.86083	4.32e-15
	cg02673417	MAP3K5	NM_005923	-0.31981	0.0267016	0.89035	2.49e-17
	cg25950638			-0.319759	0.0267272	0.936827	1.29e-22
	cg05694563	PEMT;PEMT;PEMT	NM_148172;NM_148173;NM_007169	-0.319751	0.0267307	0.915738	7.73e-20
	cg23251057			-0.319485	0.0268646	0.909569	3.67e-19
	cg24480227	VTI1A	NM_145206	-0.319412	0.0269015	0.800786	8.31e-12
	cg19429405	C10orf105;CDH23	NM_001168390;NM_022124	-0.319241	0.0269877	0.894181	1.15e-17
	cg26877077			-0.319144	0.027037	0.906982	6.82e-19
	cg03126694	LPAR6;LPAR6;RB1	NM_001162497;NM_005767;NM_000321	-0.318998	0.0271108	0.944572	6.93e-24
	cg14746387			-0.31891	0.0271555	0.889536	2.93e-17
	cg26392924	SLC23A1;SLC23A1	NM_152685;NM_005847	-0.318338	0.027448	0.809268	3.37e-12
	cg09868035	C20orf135	NM_080622	-0.318132	0.0275535	0.884381	7.9e-17
	cg23709535	ANKS1A	NM_015245	-0.318085	0.0275776	0.929311	1.58e-21
	cg00602295			-0.318027	0.0276077	0.859387	5.38e-15
	cg15825027			-0.317892	0.0276772	0.882524	1.12e-16
	cg05416911	C1S;C1S	NM_001734;NM_201442	-0.317754	0.0277487	0.815356	1.71e-12
	cg16395997	WDR8	NM_017818	-0.317428	0.0279177	0.817603	1.33e-12
	cg15010903	TIMP2	NM_003255	-0.317375	0.0279456	0.899657	3.6e-18
	cg02202246	PWWP2B;PWWP2B	NM_138499;NM_001098637	-0.317368	0.0279489	0.859169	5.56e-15
	cg06311422	DST;DST;DST;DST;DST	NM_015548;NM_001144770;NM_183380;NM_001144771;NM_001144769	-0.317353	0.0279568	0.917386	4.99e-20
	cg02003117	SLC9A8	NM_015266	-0.317208	0.0280325	0.868151	1.35e-15
	cg03836521	SNORA30;SRCAP	NR_002966;NM_006662	-0.317148	0.028064	0.829512	3.22e-13
	cg01916632	PDSS2	NM_020381	-0.316844	0.0282229	0.831313	2.58e-13
	cg10487428	PDE4D	NM_001165899	-0.316682	0.0283081	0.940637	3.22e-23
	cg15089742	KSR1	NM_014238	-0.316518	0.0283946	0.844886	4.37e-14
	cg25179758	SPG20;SPG20;SPG20;SPG20	NM_001142296;NM_001142294;NM_015087;NM_001142295	-0.316392	0.0284613	0.866126	1.88e-15
	cg02394698	ARHGAP24	NM_001025616	-0.316332	0.0284928	0.849692	2.24e-14
	cg07545743	C12orf27	NR_024345	-0.316193	0.0285665	0.865512	2.07e-15
	cg21491609			-0.316152	0.0285885	0.929712	1.39e-21
	cg13962372	CDC42;CDC42;CDC42	NM_044472;NM_001039802;NM_001791	-0.315926	0.0287086	0.849816	2.2e-14
	cg16847760			-0.315749	0.028803	0.863903	2.67e-15
	cg22652378	RPTOR;RPTOR	NM_001163034;NM_020761	-0.315704	0.0288272	0.940494	3.39e-23
	cg25312440	ST6GALNAC3;ST6GALNAC3	NM_152996;NM_001160011	-0.315697	0.0288309	0.82597	4.96e-13
	cg01257799	CXCR5	NM_001716	-0.315454	0.0289608	0.852587	1.48e-14
	cg17720466	C5orf51	NM_175921	-0.315139	0.0291303	0.875883	3.67e-16
	cg01300291	C3orf21	NM_152531	-0.314844	0.0292894	0.899019	4.13e-18
	cg04730047	TBC1D23	NM_018309	-0.314778	0.0293253	0.881937	1.24e-16
	cg06485603	KCNQ1;KCNQ1	NM_000218;NM_181798	-0.314719	0.0293572	0.834976	1.62e-13
	cg00522276			-0.314693	0.0293711	0.805039	5.32e-12
	cg25939371	BRUNOL6	NM_052840	-0.314611	0.0294159	0.89416	1.15e-17
	cg02726291	GP9	NM_000174	-0.314561	0.0294429	0.857669	6.98e-15
	cg11014468	DCP1A	NM_018403	-0.31448	0.0294869	0.936067	1.68e-22
	cg17517296			-0.314373	0.0295453	0.918185	4.03e-20
	cg13758913	LOC728606	NR_024259	-0.314263	0.0296057	0.818229	1.24e-12
	cg19917083	TMEM87B	NM_032824	-0.314198	0.0296408	0.812756	2.3e-12
	cg03718025			-0.313685	0.0299229	0.846454	3.52e-14
	cg14880079	GP5	NM_004488	-0.313569	0.0299864	0.869302	1.12e-15
	cg04603130	GNG7	NM_052847	-0.313427	0.0300653	0.891045	2.17e-17
	cg14023999			-0.313218	0.0301811	0.849735	2.22e-14
	cg04674832			-0.313161	0.0302127	0.898109	5.03e-18
	cg02215171	HERC5	NM_016323	-0.313133	0.030228	0.836825	1.28e-13
	cg06177555	SPN;SPN	NM_001030288;NM_003123	-0.312962	0.0303233	0.866132	1.87e-15
	cg10301695	VWF;VWF	NM_000552;NM_000552	-0.312909	0.0303531	0.882133	1.2e-16
	cg09845000	FGR	NM_005248	-0.312818	0.030404	0.845767	3.87e-14
	cg20720686	POR	NM_000941	-0.31256	0.0305479	0.915378	8.49e-20
	cg08044454	ELMO1;ELMO1;ELMO1;ELMO1	NM_001039459;NM_014800;NM_001039459;NM_130442	-0.312535	0.0305622	0.925197	5.54e-21
	cg11925609			-0.312017	0.0308536	0.870974	8.48e-16
	cg11802797	KIF1B	NM_015074	-0.311962	0.030885	0.853205	1.35e-14
	cg01558916			-0.311749	0.0310054	0.937109	1.17e-22
	cg13814351	FAM163B	NM_001080515	-0.311559	0.0311134	0.872857	6.18e-16
	cg03240301	IGF2BP3	NM_006547	-0.311353	0.0312308	0.813582	2.09e-12
	cg14511156	OSCAR;OSCAR;OSCAR;OSCAR;OSCAR;OSCAR;OSCAR;OSCAR	NM_133168;NM_206818;NM_133169;NM_130771;NM_133169;NM_130771;NM_133168;NM_206818	-0.311026	0.0314186	0.800956	8.17e-12
	cg16350446	DCAF17;DCAF17;DCAF17	NR_028482;NM_001164821;NM_025000	-0.310945	0.0314647	0.849104	2.43e-14
	cg17355865	MYO7A;MYO7A;MYO7A	NM_000260;NM_001127180;NM_001127179	-0.310937	0.0314695	0.914734	1e-19
	cg08178956			-0.31089	0.0314965	0.837007	1.25e-13
	cg12489775			-0.310673	0.0316213	0.914572	1.05e-19
	cg21861151			-0.31049	0.0317275	0.891301	2.06e-17
	cg04319611	FNDC3B;FNDC3B	NM_022763;NM_001135095	-0.310311	0.0318311	0.89291	1.49e-17
	cg09273112	VPS24;VPS24	NM_001005753;NM_016079	-0.310249	0.0318668	0.893325	1.37e-17
	cg16669602			-0.309992	0.0320164	0.885417	6.5e-17
	cg01586609	HTR3A;HTR3A;HTR3A	NM_000869;NM_001161772;NM_213621	-0.30951	0.0322984	0.919133	3.11e-20
	cg12616923			-0.309253	0.0324495	0.870423	9.3e-16
	cg11860005	DEPDC5;DEPDC5	NM_001007188;NM_014662	-0.309211	0.0324747	0.883132	9.97e-17
	cg10317173	MYO15B	NR_003587	-0.309202	0.0324799	0.892753	1.54e-17
	cg21946374	SLC12A7	NM_006598	-0.309117	0.03253	0.913072	1.54e-19
	cg17974145	CUX1;CUX1;CUX1	NM_181500;NM_181552;NM_001913	-0.309022	0.0325864	0.884383	7.9e-17
	cg11825899	TMEM8B;TMEM8B;TMEM8B	NM_001042590;NM_016446;NM_001042589	-0.308857	0.032684	0.909103	4.11e-19
	cg17039645	C6orf10	NM_006781	-0.308722	0.0327639	0.855331	9.89e-15
	cg13814396			-0.308631	0.0328179	0.844344	4.7e-14
	cg15090877	P4HB	NM_000918	-0.308481	0.0329077	0.841911	6.53e-14
	cg00188748	FPGS;FPGS	NM_001018078;NM_004957	-0.308264	0.0330373	0.887862	4.06e-17
	cg06494199	LPO;LPO;LPO;LPO;LPO	NM_001160102;NM_006151;NR_027647;NM_001160102;NM_006151	-0.307448	0.0335284	0.845728	3.89e-14
	cg19513582	UBE2H;UBE2H	NM_003344;NM_182697	-0.307357	0.0335837	0.90614	8.31e-19
	cg06192961	C6orf10	NM_006781	-0.307293	0.0336222	0.850334	2.04e-14
	cg03074946	PXN;PXN;PXN;PXN	NM_025157;NM_001080855;NM_025157;NM_002859	-0.307275	0.0336333	0.852144	1.57e-14
	cg19046904			-0.306962	0.0338239	0.928873	1.81e-21
	cg04454050	TREML1	NM_178174	-0.306943	0.0338352	0.871947	7.2e-16
	cg01729262			-0.306577	0.0340593	0.836494	1.33e-13
	cg25589001	LCOR;LCOR;LCOR	NM_001170766;NM_001170765;NM_032440	-0.306149	0.0343225	0.810561	2.93e-12
	cg12754982	IGF2R	NM_000876	-0.306061	0.0343774	0.828051	3.85e-13
	cg17330252			-0.305964	0.034437	0.85882	5.87e-15
	cg21218183	GLMN	NM_053274	-0.305668	0.0346208	0.820443	9.56e-13
	cg01383911	TRIM39;TRIM39	NM_172016;NM_021253	-0.304766	0.0351854	0.900232	3.17e-18
	cg09976669	SWAP70	NM_015055	-0.304282	0.0354915	0.845688	3.91e-14
	cg02346997	RETN	NM_020415	-0.303981	0.0356835	0.847069	3.23e-14
	cg24009881			-0.303879	0.0357481	0.824363	6.02e-13
	cg01168584	EMILIN2	NM_032048	-0.303638	0.0359027	0.88015	1.72e-16
	cg25739016	RCSD1	NM_052862	-0.30361	0.0359206	0.905367	9.95e-19
	cg01404893	CBFA2T3	NM_005187	-0.303311	0.0361123	0.882923	1.04e-16
	cg08329754	RPTOR;RPTOR	NM_001163034;NM_020761	-0.303252	0.0361507	0.915726	7.75e-20
	cg15527515	SLC7A8	NM_012244	-0.303246	0.0361545	0.908699	4.53e-19
	cg06623899	DENND3	NM_014957	-0.303236	0.0361612	0.822237	7.75e-13
	cg08239426			-0.303128	0.0362309	0.896652	6.86e-18
	cg20686125	AKT3;AKT3	NM_005465;NM_181690	-0.30286	0.0364038	0.884043	8.42e-17
	cg07133930			-0.30285	0.0364107	0.875649	3.82e-16
	cg16274376	LATS2	NM_014572	-0.302813	0.0364345	0.816413	1.52e-12
	cg05880248	GDF10	NM_004962	-0.302441	0.0366762	0.908296	4.99e-19
	cg21780428	TMEM217	NM_145316	-0.302419	0.036691	0.867466	1.51e-15
	cg11771383	INPP5A	NM_005539	-0.301414	0.0373512	0.801966	7.35e-12
	cg27305772	MUS81	NM_025128	-0.301376	0.0373764	0.885507	6.39e-17
	cg04217515	ITGB2;ITGB2	NM_000211;NM_001127491	-0.300951	0.0376591	0.840006	8.42e-14
	cg24246360	IBTK	NM_015525	-0.300364	0.0380522	0.902468	1.93e-18
	cg12517576	IMPDH1;IMPDH1;IMPDH1;IMPDH1	NM_001142576;NM_183243;NM_000883;NM_001102605	-0.29994	0.0383382	0.873792	5.27e-16
	cg23770271	ITGAE;ITGAE	NM_002208;NM_002208	-0.299931	0.0383437	0.888747	3.42e-17
	cg25706447	PIGV	NM_017837	-0.29989	0.0383716	0.838359	1.05e-13
	cg22091236	RPTOR;RPTOR	NM_001163034;NM_020761	-0.299587	0.0385777	0.896929	6.47e-18
	cg14085840			-0.299443	0.0386757	0.826202	4.83e-13
	cg21692308	AMIGO1	NM_020703	-0.2994	0.0387049	0.817763	1.3e-12
	cg17734802	DIO1;DIO1;DIO1;DIO1	NM_213593;NM_000792;NM_001039716;NM_001039715	-0.299232	0.0388191	0.906276	8.05e-19
	cg02979487	AFF1;AFF1	NM_001166693;NM_005935	-0.299015	0.0389679	0.876816	3.12e-16
	cg04341343			-0.298979	0.0389923	0.883914	8.62e-17
	cg00990740	ERG;ERG;ERG;ERG	NM_004449;NM_182918;NM_001136155;NM_001136154	-0.298915	0.0390362	0.857021	7.69e-15
	cg23489038	CUX2	NM_015267	-0.298634	0.0392297	0.830347	2.91e-13
	cg10880928	C9orf86;C9orf86	NM_017995;NM_024718	-0.29845	0.0393571	0.819508	1.07e-12
	cg07401324	PTPRJ;PTPRJ	NM_002843;NM_001098503	-0.29818	0.0395435	0.84369	5.14e-14
	cg18448570	BLNK;BLNK	NM_013314;NM_001114094	-0.298066	0.0396233	0.800764	8.33e-12
	cg15723028	RIPK2	NM_003821	-0.297685	0.0398884	0.851568	1.71e-14
	cg24519108	ANGPT2;ANGPT2;ANGPT2;MCPH1	NM_001118888;NM_001118887;NM_001147;NM_024596	-0.297643	0.0399181	0.837614	1.15e-13
	cg02935052	CLIP2;CLIP2	NM_032421;NM_003388	-0.297239	0.0402014	0.810908	2.82e-12
	cg17953136	LAPTM4A	NM_014713	-0.297119	0.0402858	0.897238	6.05e-18
	cg14608454	NDOR1;NDOR1;NDOR1;NDOR1	NM_001144028;NM_001144027;NM_014434;NM_001144026	-0.296994	0.0403739	0.82644	4.69e-13
	cg03652525			-0.296835	0.0404859	0.856056	8.88e-15
	cg22688566	MYO18A;MYO18A	NM_078471;NM_203318	-0.296794	0.0405149	0.934729	2.67e-22
	cg15160801	S100A9	NM_002965	-0.296656	0.0406133	0.817838	1.29e-12
	cg15948124	GABRR2	NM_002043	-0.296255	0.0408984	0.835776	1.46e-13
	cg03635685	CABIN1	NM_012295	-0.295679	0.0413111	0.911581	2.23e-19
	cg02786368	ORC2L	NM_006190	-0.295575	0.0413855	0.880395	1.65e-16
	cg26675785	ABCC1;ABCC1;ABCC1;ABCC1;ABCC1	NM_019862;NM_019898;NM_019899;NM_004996;NM_019900	-0.295187	0.0416657	0.867714	1.45e-15
	cg27250037	C20orf117;C20orf117	NM_080627;NM_199181	-0.295178	0.0416724	0.827315	4.22e-13
	cg03676485	LFNG;LFNG;LFNG;LFNG	NM_001166355;NM_001040167;NM_001040168;NM_002304	-0.295111	0.041721	0.825592	5.2e-13
	cg10583319			-0.29506	0.0417577	0.850845	1.9e-14
	cg16033723			-0.29487	0.0418961	0.82791	3.92e-13
	cg07110356	MPO	NM_000250	-0.294489	0.0421737	0.822146	7.83e-13
	cg09258509			-0.294341	0.0422823	0.827213	4.27e-13
	cg26792295	RFTN1	NM_015150	-0.294251	0.0423482	0.882832	1.05e-16
	cg25050026	MFSD1;MFSD1	NM_022736;NM_001167903	-0.294201	0.0423854	0.802976	6.61e-12
	cg14523312	DKFZp761E198	NM_138368	-0.293881	0.0426206	0.895401	8.92e-18
	cg27368333	DCUN1D1	NM_020640	-0.293628	0.0428078	0.905282	1.01e-18
	cg17164954	ARID1B;ARID1B;ARID1B	NM_017519;NM_175863;NM_020732	-0.293609	0.0428216	0.906656	7.36e-19
	cg23379806	FAM107B	NM_031453	-0.293517	0.0428898	0.892328	1.68e-17
	cg01454951	EIF4E3;EIF4E3;EIF4E3;EIF4E3	NM_001134651;NM_001134649;NM_173359;NM_001134650	-0.293449	0.0429406	0.812813	2.28e-12
	cg13799772	ALG1L2	NM_001136152	-0.292626	0.043555	0.823546	6.64e-13
	cg13623749	JARID2	NM_004973	-0.292624	0.0435562	0.896224	7.5e-18
	cg19445690			-0.292429	0.0437032	0.890683	2.33e-17
	cg13984928	ITGAE	NM_002208	-0.292155	0.0439096	0.843374	5.36e-14
	cg03291548			-0.292121	0.0439354	0.836709	1.3e-13
	cg04350675			-0.292098	0.043953	0.897722	5.46e-18
	cg17500686			-0.292059	0.0439827	0.822767	7.28e-13
	cg17383842			-0.291882	0.0441166	0.835436	1.53e-13
	cg24304425	PRTN3;PRTN3	NM_002777;NM_002777	-0.290994	0.0447943	0.8881	3.88e-17
	cg11919271	MED12L;P2RY12	NM_053002;NM_022788	-0.290915	0.0448556	0.869899	1.01e-15
	cg11938455	DTNBP1;DTNBP1;DTNBP1	NM_183041;NM_183040;NM_032122	-0.290835	0.044917	0.922408	1.25e-20
	cg09390594			-0.290755	0.0449785	0.911646	2.2e-19
	cg06902099	ANKS1A	NM_015245	-0.290418	0.0452388	0.891898	1.83e-17
	cg15390816	NCOR2;NCOR2	NM_006312;NM_001077261	-0.290341	0.045299	0.817734	1.31e-12
	cg05714729	GALNT1	NM_020474	-0.290141	0.0454542	0.927111	3.12e-21
	cg17385088			-0.289589	0.045885	0.915247	8.78e-20
	cg22943115	PDGFRB	NM_002609	-0.28957	0.0459001	0.863096	3.03e-15
	cg01408486	CXXC5	NM_016463	-0.289468	0.04598	0.863734	2.74e-15
	cg07799277			-0.289278	0.0461295	0.891595	1.94e-17
	cg00328058	PLEKHN1;KLHL17;PLEKHN1	NM_001160184;NM_198317;NM_032129	-0.289263	0.046141	0.816429	1.52e-12
	cg00708789	PROM1;PROM1	NM_001145848;NM_001145847	-0.288446	0.0467877	0.884981	7.06e-17
	cg26814335	AGPAT5	NM_018361	-0.288386	0.0468356	0.864652	2.37e-15
	cg02308232	KDM6B	NM_001080424	-0.28838	0.0468402	0.922977	1.06e-20
	cg05240166	TMEM159;DNAH3	NM_020422;NM_017539	-0.288374	0.0468449	0.880754	1.54e-16
	cg11847933	CABC1	NM_020247	-0.288277	0.0469222	0.832063	2.34e-13
	cg00309945	LDLRAD2;HSPG2	NM_001013693;NM_005529	-0.287461	0.047577	0.855922	9.06e-15
	cg08691775	NDRG1;NDRG1	NM_001135242;NM_006096	-0.287307	0.0477016	0.903169	1.65e-18
	cg16312968			-0.286514	0.0483467	0.8863	5.49e-17
	cg01274826	ZNF709;ZNF709	NM_152601;NM_001145647	-0.286507	0.048352	0.830628	2.81e-13
	cg06320175	DNM3;DNM3	NM_015569;NM_001136127	-0.286407	0.048434	0.849931	2.16e-14
	cg23661721			-0.286351	0.0484797	0.852368	1.52e-14
	cg08994763	C3orf21	NM_152531	-0.286256	0.0485578	0.80277	6.76e-12
	cg14499058	TRAPPC9;TRAPPC9	NM_001160372;NM_031466	-0.286246	0.0485663	0.893011	1.46e-17
	cg00608540	TRIM7;TRIM7;TRIM7;TRIM7;TRIM7	NM_203297;NM_203293;NM_203294;NM_203295;NM_203296	-0.28621	0.0485953	0.881048	1.46e-16
	cg16824319	LOC646627	NM_001085474	-0.286152	0.0486433	0.872414	6.66e-16
	cg15846482	UEVLD;UEVLD	NM_001040697;NM_018314	-0.286053	0.0487251	0.847845	2.9e-14
	cg15337006	ITGAM;ITGAM	NM_001145808;NM_000632	-0.285983	0.0487825	0.913436	1.4e-19
	cg19735804			-0.285631	0.0490725	0.839331	9.21e-14
	cg15335334	RECQL5;LOC100130933	NM_004259;NM_001162997	-0.285596	0.0491016	0.846145	3.67e-14
	cg22514173			-0.285286	0.0493592	0.851624	1.7e-14
	cg07212327	FAM49B	NM_016623	-0.285134	0.0494852	0.908128	5.19e-19
	cg21019522	SLC22A18;SLC22A18AS	NM_183233;NM_007105	-0.285064	0.0495435	0.875509	3.92e-16
	cg07139162	ST3GAL2	NM_006927	-0.284722	0.0498301	0.874922	4.34e-16
	cg11227278	KLHL29	NM_052920	0.289887	0.0456517	-0.818686	1.17e-12
	cg11309237			0.290575	0.0451173	-0.828137	3.81e-13
	cg16493584	SAMD3	NM_001017373	0.291417	0.0444706	-0.804436	5.67e-12
	cg03728799			0.295273	0.0416033	-0.843955	4.96e-14
	cg24010658	ZC3H3	NM_015117	0.297624	0.0399309	-0.840231	8.17e-14
	cg11893955			0.299641	0.0385405	-0.913521	1.37e-19
	cg26348243	LTA;LTA	NM_001159740;NM_000595	0.302029	0.0369464	-0.853397	1.31e-14
	cg20611272			0.302077	0.0369147	-0.858972	5.73e-15
	cg03388043	CCDC57	NM_198082	0.311459	0.0311708	-0.848507	2.64e-14
	cg04450994	SLC22A23;SLC22A23	NM_021945;NM_015482	0.325625	0.0239165	-0.838565	1.02e-13
	cg19510565	LAPTM5	NM_006762	0.329005	0.0224122	-0.81775	1.31e-12
	cg08441850	IKZF3;IKZF3;IKZF3;IKZF3;IKZF3;IKZF3	NM_183228;NM_183229;NM_012481;NM_183230;NM_183231;NM_183232	0.331849	0.0212094	-0.870225	9.61e-16
	cg20146241	RCAN3	NM_013441	0.340865	0.017749	-0.847224	3.16e-14
	cg25140783	RCAN3	NM_013441	0.345232	0.0162528	-0.936089	1.67e-22
	cg02668248	KLF2	NM_016270	0.348232	0.0152883	-0.914874	9.68e-20
	cg14165142	CDC25B;CDC25B;CDC25B	NM_021873;NM_004358;NM_021872	0.349551	0.0148797	-0.860814	4.33e-15
	cg12216435	COPG	NM_016128	0.355764	0.0130789	-0.811155	2.74e-12
	cg19993258	CHRNA3;CHRNA3	NM_000743;NM_001166694	0.359142	0.0121803	-0.84057	7.82e-14
	cg21726551	GPR133	NM_198827	0.359363	0.0121233	-0.877573	2.73e-16
	cg10061805			0.363911	0.011002	-0.832243	2.29e-13
	cg17169196	LTA;LTA;LTA	NM_000595;NM_001159740;NM_001159740	0.365729	0.0105794	-0.907722	5.72e-19
	cg24216966	LTA;LTA;LTA	NM_000595;NM_001159740;NM_000595	0.37161	0.00930659	-0.85397	1.21e-14
	cg00010672			0.378525	0.00798073	-0.831441	2.53e-13
	cg20267828	THEMIS;THEMIS;THEMIS	NM_001164687;NM_001010923;NM_001164685	0.397982	0.00508871	-0.872626	6.42e-16
Turquoise module-HDL-C	cg27616007	LST1;LST1;LST1;LST1;LST1;LST1;LST1;LST1	NR_029461;NM_007161;NM_205839;NM_205838;NM_205840;NM_001166538;NR_029462;NM_205837	-0.423405	0.00271265	0.808123	3.82e-12
	cg24240870	GOSR1;GOSR1;GOSR1	NM_004871;NM_001007024;NM_001007025	-0.419622	0.00298804	0.806499	4.55e-12
	cg18089000	GBGT1	NM_021996	-0.418148	0.00310182	0.861524	3.88e-15
	cg00510447	TNFRSF12A	NM_016639	-0.413774	0.00346225	0.819745	1.04e-12
	cg00805360	ADAM8;ADAM8;ADAM8	NM_001109;NM_001164489;NM_001164490	-0.409393	0.00385972	0.801222	7.94e-12
	cg10866623	TTLL6	NM_001130918	-0.407982	0.00399598	0.85417	1.17e-14
	cg27575890	EIF3D	NM_003753	-0.39132	0.00595409	0.827444	4.15e-13
	cg11081833	LGALS2;LGALS2	NM_006498;NM_006498	-0.389441	0.00622018	0.86412	2.58e-15
	cg04459545	USHBP1	NM_031941	-0.387259	0.00654229	0.893003	1.46e-17
	cg13443911	TGFBR1;TGFBR1	NM_001130916;NM_004612	-0.386701	0.00662688	0.846526	3.48e-14
	cg18064468			-0.384516	0.00696758	0.840462	7.93e-14
	cg01827726	TTYH3	NM_025250	-0.382355	0.0073194	0.818498	1.2e-12
	cg15961693			-0.382136	0.00735589	0.804963	5.36e-12
	cg24840601	SUMF1;SUMF1;SUMF1	NM_001164675;NM_182760;NM_001164674	-0.380687	0.00760131	0.811374	2.68e-12
	cg17330252			-0.37727	0.00820851	0.85882	5.87e-15
	cg16897608	GLIS1	NM_147193	-0.368792	0.00989888	0.851282	1.78e-14
	cg01300291	C3orf21	NM_152531	-0.366453	0.010415	0.899019	4.13e-18
	cg24804707	TG;SLA;SLA	NM_003235;NM_001045557;NM_001045556	-0.366384	0.0104307	0.805796	4.9e-12
	cg04776231	PTPN12;PTPN12;PTPN12	NM_001131009;NM_001131008;NM_002835	-0.36487	0.0107775	0.816	1.59e-12
	cg26585899	ATXN1L;ZNF821	NR_024612;NM_017530	-0.364111	0.0109549	0.836384	1.35e-13
	cg27589594	SLC5A10;SLC5A10	NM_001042450;NM_152351	-0.359411	0.012111	0.908403	4.86e-19
	cg26430305	C4BPA	NM_000715	-0.358176	0.0124317	0.902143	2.08e-18
	cg14324675	LST1;LST1;LST1;LST1;LST1;LST1;LST1;LST1	NR_029461;NM_007161;NM_205839;NM_205838;NM_205840;NM_001166538;NR_029462;NM_205837	-0.356666	0.0128334	0.848241	2.74e-14
	cg11911122	NCOA2	NM_006540	-0.354105	0.0135405	0.825836	5.04e-13
	cg09803321	NT5C2;NT5C2	NM_001134373;NM_012229	-0.353407	0.0137388	0.836714	1.3e-13
	cg13598881	WRNIP1;WRNIP1	NM_130395;NM_020135	-0.352196	0.0140889	0.839498	9.01e-14
	cg01472113	UGCG	NM_003358	-0.351381	0.0143286	0.892861	1.51e-17
	cg04476070	ZC3H18	NM_144604	-0.351019	0.0144363	0.842557	5.99e-14
	cg13393678			-0.350831	0.0144925	0.851119	1.82e-14
	cg09657256	G6PC3;G6PC3;G6PC3	NR_028582;NR_028581;NM_138387	-0.348936	0.0150689	0.809022	3.46e-12
	cg25099154			-0.348226	0.0152902	0.835051	1.61e-13
	cg00000029	RBL2	NM_005611	-0.346026	0.0159924	0.828947	3.45e-13
	cg16539741	CHN2	NM_004067	-0.345799	0.0160666	0.850086	2.11e-14
	cg07773434	PPP1R14B	NM_138689	-0.345474	0.016173	0.894808	1.01e-17
	cg12798040	XRCC3;XRCC3;XRCC3	NM_001100119;NM_005432;NM_001100118	-0.34497	0.0163394	0.820585	9.41e-13
	cg10301695	VWF;VWF	NM_000552;NM_000552	-0.343993	0.0166658	0.882133	1.2e-16
	cg10559803	RALGPS2	NM_152663	-0.341416	0.0175539	0.833308	2e-13
	cg03652525			-0.341359	0.0175738	0.856056	8.88e-15
	cg07026107	TEC	NM_003215	-0.340262	0.0179644	0.924536	6.73e-21
	cg03290827	SEC14L1;SEC14L1;SEC14L1;SEC14L1;SEC14L1	NM_001143999;NM_003003;NM_001144001;NM_001143998;NM_001039573	-0.339779	0.0181384	0.869353	1.11e-15
	cg00879824			-0.338659	0.0185481	0.904729	1.15e-18
	cg05674199	AHCY;AHCY	NM_001161766;NM_000687	-0.338545	0.0185901	0.849502	2.3e-14
	cg19219366	TRIM3;TRIM3	NM_006458;NM_033278	-0.338499	0.0186069	0.838967	9.66e-14
	cg25352940			-0.338411	0.0186398	0.835733	1.47e-13
	cg02500883	GRIN3A;PPP3R2;PPP3R2	NM_133445;NM_147180;NM_147180	-0.33792	0.0188225	0.811912	2.52e-12
	cg02003117	SLC9A8	NM_015266	-0.336061	0.019528	0.868151	1.35e-15
	cg25743819			-0.333526	0.0205257	0.87121	8.15e-16
	cg24197477	TMEM183B;TMEM183A	NM_001079809;NM_138391	-0.333295	0.0206187	0.899845	3.45e-18
	cg16409012			-0.331561	0.0213285	0.83366	1.92e-13
	cg26686150			-0.329974	0.0219962	0.907406	6.17e-19
	cg10309609	TOP1MT	NM_052963	-0.329931	0.0220147	0.828077	3.84e-13
	cg19689330	FARS2	NM_006567	-0.329452	0.0222195	0.805511	5.06e-12
	cg11942936			-0.329336	0.0222697	0.838312	1.05e-13
	cg13716619	NEU1	NM_000434	-0.329244	0.0223092	0.80759	4.04e-12
	cg27020966			-0.329173	0.02234	0.921946	1.42e-20
	cg24085232			-0.329088	0.0223767	0.885336	6.6e-17
	cg25652742	HDAC4	NM_006037	-0.328728	0.0225325	0.804767	5.47e-12
	cg06394460	LNX2	NM_153371	-0.328522	0.0226221	0.825886	5.01e-13
	cg00522276			-0.327578	0.0230373	0.805039	5.32e-12
	cg01710158	CDC42EP2	NM_006779	-0.327237	0.023189	0.83435	1.76e-13
	cg11825899	TMEM8B;TMEM8B;TMEM8B	NM_001042590;NM_016446;NM_001042589	-0.326556	0.0234938	0.909103	4.11e-19
	cg26132647			-0.32489	0.0242541	0.921498	1.61e-20
	cg22290528	HEXA;C15orf34	NM_000520;NR_027262	-0.324815	0.0242888	0.84125	7.14e-14
	cg18855195	RIBC2	NM_015653	-0.324234	0.0245592	0.866248	1.84e-15
	cg15089742	KSR1	NM_014238	-0.322953	0.0251639	0.844886	4.37e-14
	cg03313447	CCDC97	NM_052848	-0.319552	0.0268311	0.896571	6.97e-18
	cg19737225	ANKLE1	NM_152363	-0.319479	0.0268677	0.826944	4.41e-13
	cg18964319			-0.319183	0.027017	0.901463	2.42e-18
	cg00044466			-0.318353	0.0274401	0.870459	9.24e-16
	cg15632862	FHL3	NM_004468	-0.318028	0.0276072	0.853236	1.34e-14
	cg07743805			-0.317726	0.027763	0.831633	2.47e-13
	cg22999864			-0.317409	0.0279275	0.808991	3.47e-12
	cg03997145			-0.316621	0.0283403	0.86266	3.25e-15
	cg19046904			-0.313928	0.029789	0.928873	1.81e-21
	cg00127150	ZNF280B	NM_080764	-0.313619	0.029959	0.89048	2.43e-17
	cg01274826	ZNF709;ZNF709	NM_152601;NM_001145647	-0.312366	0.0306568	0.830628	2.81e-13
	cg07141002	H1F0	NM_005318	-0.311814	0.0309685	0.807012	4.3e-12
	cg17950348	DNAJB6	NM_058246	-0.311114	0.0313676	0.866416	1.79e-15
	cg03044513			-0.311023	0.0314202	0.856384	8.46e-15
	cg01128574	MAD1L1;MAD1L1;MAD1L1	NM_003550;NM_001013837;NM_001013836	-0.310958	0.0314576	0.826595	4.6e-13
	cg21932231	CRIM1	NM_016441	-0.310522	0.0317086	0.874454	4.7e-16
	cg15721134			-0.309722	0.0321739	0.820755	9.22e-13
	cg00536532	C6orf227	NR_027908	-0.309299	0.0324228	0.84463	4.52e-14
	cg23299218	DIAPH3	NM_001042517	-0.308563	0.0328588	0.873635	5.41e-16
	cg05600496			-0.307835	0.0332947	0.891386	2.03e-17
	cg09492074	MEGF11	NM_032445	-0.30781	0.0333096	0.933783	3.68e-22
	cg14454680	C3orf26;FILIP1L;FILIP1L	NM_032359;NM_182909;NM_001042459	-0.307696	0.0333782	0.900428	3.04e-18
	cg11505048	RGL1;APOBEC4	NM_015149;NM_203454	-0.307542	0.0334713	0.887222	4.6e-17
	cg24964103	VNN1	NM_004666	-0.306162	0.034315	0.878836	2.18e-16
	cg00602295			-0.305473	0.0347422	0.859387	5.38e-15
	cg00163365	COQ2	NM_015697	-0.305171	0.0349311	0.834043	1.83e-13
	cg26161997			-0.305093	0.0349798	0.879518	1.93e-16
	cg05528339			-0.30503	0.0350198	0.910741	2.75e-19
	cg09012001	IFFO2	NM_001136265	-0.304991	0.0350442	0.834488	1.73e-13
	cg02108620	ULK4	NM_017886	-0.304284	0.0354906	0.897261	6.02e-18
	cg00042568	NR2C2	NM_003298	-0.304116	0.0355973	0.926782	3.44e-21
	cg04119529	NTHL1	NM_002528	-0.303883	0.0357456	0.861655	3.8e-15
	cg26833538	ALDH3B1;ALDH3B1;ALDH3B1	NM_001030010;NM_000694;NM_001161473	-0.303012	0.0363055	0.822833	7.22e-13
	cg08120831	LRRC43;LRRC43	NM_152759;NM_001098519	-0.302824	0.0364275	0.828875	3.48e-13
	cg19700872	GPR151	NM_194251	-0.302654	0.0365381	0.847387	3.09e-14
	cg25725418			-0.302647	0.0365421	0.864206	2.55e-15
	cg18681352	SMCR7L	NM_019008	-0.302637	0.0365487	0.808203	3.78e-12
	cg15773890			-0.30185	0.0370637	0.879933	1.79e-16
	cg01564818	SETD5	NM_001080517	-0.301682	0.0371745	0.931332	8.27e-22
	cg27171835	GPBP1L1	NM_021639	-0.301654	0.0371931	0.820154	9.89e-13
	cg12080306	YPEL2	NM_001005404	-0.301652	0.0371943	0.886883	4.91e-17
	cg17069873	CNTD2	NM_024877	-0.301537	0.03727	0.915175	8.95e-20
	cg07563400	ADORA2B	NM_000676	-0.300862	0.0377185	0.830082	3e-13
	cg14521077			-0.300552	0.037926	0.81569	1.65e-12
	cg05126095	AQP2	NM_000486	-0.30049	0.0379675	0.897863	5.3e-18
	cg06710735	CAMP	NM_004345	-0.300097	0.0382318	0.89653	7.03e-18
	cg25246281	MIR451;MIR144	NR_029970;NR_029685	-0.300036	0.0382733	0.840749	7.63e-14
	cg00390511	AOAH	NM_001637	-0.299826	0.0384154	0.922164	1.34e-20
	cg02710860	MAPKBP1;MAPKBP1	NM_014994;NM_001128608	-0.299547	0.0386045	0.822674	7.36e-13
	cg27250037	C20orf117;C20orf117	NM_080627;NM_199181	-0.298936	0.0390224	0.827315	4.22e-13
	cg24397007	FOSL2	NM_005253	-0.298802	0.0391144	0.821838	8.12e-13
	cg00384553			-0.298281	0.0394736	0.826506	4.65e-13
	cg07283804	SERGEF	NM_012139	-0.298176	0.0395466	0.804599	5.57e-12
	cg03437540	PRR5;PRR5-ARHGAP8;PRR5;PRR5;PRR5;PRR5	NM_001017529;NM_181334;NM_001017530;NM_001017528;NM_015366;NM_181333	-0.297962	0.0396951	0.918303	3.9e-20
	cg01880929	CRIM1	NM_016441	-0.297624	0.0399313	0.876856	3.1e-16
	cg12537379	CUX1;CUX1;CUX1	NM_181500;NM_181552;NM_001913	-0.295818	0.0412108	0.888947	3.29e-17
	cg06010437			-0.295777	0.0412407	0.900444	3.03e-18
	cg18793215	CRABP2	NM_001878	-0.295404	0.0415091	0.911931	2.05e-19
	cg01153613			-0.295249	0.0416211	0.822561	7.46e-13
	cg00931491	SULT1A2;SULT1A2	NM_001054;NM_177528	-0.29472	0.0420049	0.807275	4.18e-12
	cg09419900	PSTK	NM_153336	-0.294715	0.0420089	0.825588	5.2e-13
	cg08708079	SPEF1	NM_015417	-0.294542	0.042135	0.930399	1.12e-21
	cg22406102			-0.294486	0.0421764	0.824946	5.61e-13
	cg00083659	C22orf33;C22orf33	NM_178552;NM_001163857	-0.294133	0.042435	0.835676	1.48e-13
	cg20761853	TIMP2	NM_003255	-0.294111	0.0424512	0.829355	3.28e-13
	cg02202246	PWWP2B;PWWP2B	NM_138499;NM_001098637	-0.293766	0.0427052	0.859169	5.56e-15
	cg02673417	MAP3K5	NM_005923	-0.29363	0.0428063	0.89035	2.49e-17
	cg22855020	SLC20A2	NM_006749	-0.293264	0.0430778	0.885173	6.8e-17
	cg25079915	TMEM37	NM_183240	-0.292967	0.0432996	0.887687	4.21e-17
	cg09849688	ARID1A;ARID1A	NM_006015;NM_139135	-0.292694	0.0435035	0.864284	2.52e-15
	cg16684817	C1orf38;C1orf38;C1orf38	NM_001105556;NM_001039477;NM_004848	-0.292095	0.0439551	0.896798	6.65e-18
	cg01765641	TBC1D5;TBC1D5;TBC1D5	NM_014744;NM_014744;NM_001134380	-0.291969	0.0440501	0.832422	2.24e-13
	cg09756109	IFT140;TMEM204	NM_014714;NM_024600	-0.291865	0.0441294	0.847288	3.13e-14
	cg09976669	SWAP70	NM_015055	-0.29167	0.0442777	0.845688	3.91e-14
	cg06181069	AQP10	NM_080429	-0.290196	0.0454112	0.857267	7.41e-15
	cg25982657			-0.289713	0.045788	0.840706	7.68e-14
	cg22777724	HOXB2	NM_002145	-0.289174	0.0462108	0.879212	2.04e-16
	cg26562772	DUSP10;DUSP10;DUSP10	NM_144728;NM_007207;NM_144729	-0.288963	0.0463778	0.869423	1.1e-15
	cg06062279	GALNS	NM_000512	-0.288783	0.0465202	0.802026	7.3e-12
	cg10512278	DPEP2	NM_022355	-0.28871	0.0465776	0.855615	9.48e-15
	cg24043628			-0.287943	0.0471896	0.836445	1.34e-13
	cg26023268	CPSF4L	NM_001129885	-0.287893	0.0472297	0.817242	1.38e-12
	cg07376232	AMICA1;AMICA1	NM_001098526;NM_153206	-0.287317	0.0476936	0.826659	4.57e-13
	cg19917083	TMEM87B	NM_032824	-0.286923	0.0480134	0.812756	2.3e-12
	cg18770579	C19orf76;PRMT1;PRMT1;PRMT1	NM_001101340;NM_198318;NM_198319;NM_001536	-0.286823	0.0480941	0.809184	3.4e-12
	cg19925518			-0.286768	0.0481389	0.842791	5.8e-14
	cg13226290	NSFL1C;NSFL1C;NSFL1C	NM_182483;NM_016143;NM_018839	-0.286473	0.0483802	0.829765	3.12e-13
	cg14817906	CNNM4	NM_020184	-0.286371	0.0484635	0.854552	1.11e-14
Turquoise module-LDL-C	cg07665923	C7orf50;C7orf50;C7orf50	NM_001134396;NM_032350;NM_001134395	-0.454624	0.0011697	0.832487	2.22e-13
	cg02119755	PDPK1;PDPK1	NM_031268;NM_002613	-0.44162	0.00167658	0.867041	1.62e-15
	cg06142108	SYT17	NM_016524	-0.430911	0.00223188	0.880076	1.75e-16
	cg08597292	GABRR2	NM_002043	-0.429726	0.00230236	0.811167	2.74e-12
	cg03782662	TRIM26	NM_003449	-0.427422	0.00244508	0.81151	2.64e-12
	cg00864012	TEX2	NM_018469	-0.425462	0.00257257	0.84923	2.39e-14
	cg00214688	ITGB1;ITGB1;ITGB1;ITGB1;ITGB1;ITGB1	NM_033668;NM_133376;NM_002211;NM_033667;NM_033669;NM_033666	-0.424048	0.00266818	0.803906	5.99e-12
	cg10380312	ARHGEF7;ARHGEF7;ARHGEF7;ARHGEF7;ARHGEF7	NM_001113511;NM_001113513;NM_003899;NM_001113512;NM_145735	-0.419377	0.00300668	0.820639	9.35e-13
	cg09910856	ARHGAP10	NM_024605	-0.410664	0.00374043	0.807199	4.22e-12
	cg00000029	RBL2	NM_005611	-0.41054	0.00375191	0.828947	3.45e-13
	cg03029090	LIPC	NM_000236	-0.408608	0.00393504	0.861814	3.71e-15
	cg06532779	GRIN3B	NM_138690	-0.407582	0.00403531	0.806031	4.78e-12
	cg20668765			-0.405532	0.00424265	0.86331	2.93e-15
	cg00657780			-0.403049	0.00450618	0.890166	2.59e-17
	cg24586978	DOCK9;DOCK9;DOCK9;DOCK9	NM_015296;NM_001130050;NM_001130049;NM_001130048	-0.402509	0.00456532	0.872187	6.92e-16
	cg13670898			-0.400216	0.00482425	0.824369	6.02e-13
	cg11919336	GPR109A	NM_177551	-0.398604	0.00501385	0.908941	4.27e-19
	cg20708305	CPNE9	NM_153635	-0.39774	0.00511813	0.819731	1.04e-12
	cg11220060	KLF1	NM_006563	-0.395415	0.00540814	0.884662	7.49e-17
	cg17327067	PLEC1;PLEC1;PLEC1;PLEC1	NM_000445;NM_201378;NM_201379;NM_201380	-0.395182	0.00543803	0.852121	1.58e-14
	cg01905773	TMEM105	NM_178520	-0.394632	0.00550901	0.884497	7.73e-17
	cg23917868	MIR145;LOC728264	NR_029686;NR_027180	-0.39459	0.0055145	0.848653	2.59e-14
	cg01445659	MRPL34;ABHD8	NM_023937;NM_024527	-0.394375	0.00554254	0.916835	5.78e-20
	cg01280180	TXNDC6	NM_178130	-0.392867	0.00574247	0.841085	7.3e-14
	cg21671607	RAG2;C11orf74	NM_000536;NM_138787	-0.392235	0.00582806	0.84103	7.35e-14
	cg06067425			-0.391464	0.00593414	0.838901	9.74e-14
	cg22851080	TNXB	NM_019105	-0.390765	0.0060317	0.801615	7.63e-12
	cg04582136	TRAK1;TRAK1	NM_001042646;NM_014965	-0.390667	0.00604543	0.848071	2.81e-14
	cg18809074	FAR2	NM_018099	-0.388067	0.00642143	0.814203	1.95e-12
	cg22092521	CFD	NM_001928	-0.387992	0.00643251	0.909638	3.61e-19
	cg09676669	AQP1	NM_198098	-0.387799	0.00646127	0.873536	5.5e-16
	cg24275855			-0.387628	0.00648678	0.862979	3.09e-15
	cg16598508			-0.387068	0.00657115	0.918619	3.58e-20
	cg14971586	BIK	NM_001197	-0.386246	0.00669666	0.815653	1.66e-12
	cg07654588	TBC1D5;TBC1D5;TBC1D5	NM_014744;NM_014744;NM_001134380	-0.385266	0.00684895	0.813547	2.1e-12
	cg07461572			-0.384689	0.00694007	0.833308	2e-13
	cg25723459	ST3GAL4	NM_006278	-0.384625	0.00695025	0.900936	2.72e-18
	cg11606261	SP1;SP1	NM_003109;NM_138473	-0.384602	0.00695392	0.899928	3.39e-18
	cg24197477	TMEM183B;TMEM183A	NM_001079809;NM_138391	-0.384246	0.00701077	0.899845	3.45e-18
	cg03707168	PPP1R15A	NM_014330	-0.384218	0.00701523	0.860672	4.42e-15
	cg14754427	DERA	NM_015954	-0.384216	0.00701545	0.91503	9.29e-20
	cg13333374	ACSL5	NM_203379	-0.383542	0.00712427	0.854601	1.1e-14
	cg15210526	MPZL1;MPZL1;MPZL1	NM_001146191;NM_003953;NM_024569	-0.382833	0.00724026	0.895407	8.91e-18
	cg18642459			-0.381237	0.00750736	0.811195	2.73e-12
	cg25199536	CCDC21	NM_022778	-0.379496	0.00780833	0.918753	3.45e-20
	cg07052627	MDK;DGKZ;DGKZ;DGKZ;DGKZ	NM_001012334;NM_001105540;NM_201533;NM_003646;NM_201532	-0.379326	0.00783824	0.831196	2.61e-13
	cg17053201	GABBR1;GABBR1;GABBR1	NM_021904;NM_021903;NM_001470	-0.378737	0.00794285	0.821553	8.4e-13
	cg02194129	XRCC3;XRCC3;XRCC3	NM_001100119;NM_005432;NM_001100118	-0.377497	0.00816686	0.898727	4.4e-18
	cg00605777	SEMA4C	NM_017789	-0.377492	0.00816774	0.898822	4.31e-18
	cg14276125	ADRBK1	NM_001619	-0.377475	0.00817089	0.93396	3.47e-22
	cg00543769			-0.377381	0.00818806	0.855763	9.28e-15
	cg02667291	C19orf22	NM_138774	-0.377245	0.00821302	0.899742	3.53e-18
	cg06991495	CSNK1E;CSNK1E	NM_001894;NM_152221	-0.3772	0.00822134	0.91688	5.72e-20
	cg17416793	KCNQ1;KCNQ1	NM_000218;NM_181798	-0.377144	0.00823159	0.870338	9.43e-16
	cg02333960	COX19	NM_001031617	-0.376996	0.00825889	0.804689	5.52e-12
	cg00163365	COQ2	NM_015697	-0.376161	0.00841425	0.834043	1.83e-13
	cg23560388	TIAM2;TIAM2	NM_012454;NM_001010927	-0.375973	0.00844957	0.811811	2.55e-12
	cg13617561	CABP4	NM_145200	-0.37527	0.00858298	0.837744	1.13e-13
	cg22644321	TRIB1	NM_025195	-0.375211	0.00859415	0.801087	8.06e-12
	cg19342782	HHLA3;ANKRD13C;HHLA3;HHLA3;HHLA3	NM_001036646;NM_030816;NR_027404;NM_001031693;NM_001036645	-0.374529	0.00872539	0.907223	6.44e-19
	cg11942936			-0.374264	0.00877676	0.838312	1.05e-13
	cg25758828	PAX8;PAX8;PAX8;PAX8;PAX8;LOC440839	NM_013953;NM_003466;NM_013952;NM_013951;NM_013992;NR_029399	-0.374035	0.00882139	0.875093	4.21e-16
	cg00211174	MCM2	NM_004526	-0.373893	0.0088493	0.916245	6.76e-20
	cg00524900	TNFAIP8	NM_001077654	-0.373854	0.00885679	0.925619	4.89e-21
	cg06853894	TNFRSF8;TNFRSF8	NM_001243;NM_152942	-0.373528	0.00892091	0.874728	4.49e-16
	cg09106999	CDK2;SILV;CDK2	NM_001798;NM_006928;NM_052827	-0.37295	0.00903561	0.925216	5.51e-21
	cg18364120	AMICA1	NM_001098526	-0.372344	0.00915726	0.827244	4.25e-13
	cg05985135			-0.372323	0.00916151	0.853107	1.37e-14
	cg02500883	GRIN3A;PPP3R2;PPP3R2	NM_133445;NM_147180;NM_147180	-0.371911	0.00924512	0.811912	2.52e-12
	cg12593793			-0.371604	0.00930782	0.897467	5.77e-18
	cg21599336	LOC100128239	NR_027276	-0.371461	0.00933702	0.886669	5.12e-17
	cg24123679	AZU1	NM_001700	-0.370171	0.00960508	0.867631	1.47e-15
	cg07840332			-0.369975	0.00964644	0.827519	4.11e-13
	cg05654163	SLC39A2;SLC39A2	NM_014579;NM_014579	-0.366521	0.0103998	0.853377	1.32e-14
	cg03258139	SMARCA2;SMARCA2	NM_003070;NM_139045	-0.365534	0.0106241	0.853792	1.24e-14
	cg07175301	IGSF9;IGSF9	NM_020789;NM_001135050	-0.365271	0.0106847	0.811276	2.7e-12
	cg24740647			-0.364989	0.0107496	0.867159	1.59e-15
	cg08130265	C15orf5;SGK269	NR_026813;NM_024776	-0.364935	0.0107622	0.941279	2.52e-23
	cg01441127	MR1	NM_001531	-0.364332	0.010903	0.894028	1.19e-17
	cg00127487			-0.364103	0.0109568	0.87681	3.12e-16
	cg23713742	SPAG4	NM_003116	-0.362637	0.0113067	0.930376	1.13e-21
	cg06419601			-0.362515	0.0113363	0.875297	4.07e-16
	cg11748260	DHX16;DHX16	NM_001164239;NM_003587	-0.362225	0.0114068	0.935545	2.02e-22
	cg04118119	ESD	NM_001984	-0.362175	0.0114191	0.938355	7.47e-23
	cg09178384	SH3RF1	NM_020870	-0.361997	0.0114627	0.861852	3.68e-15
	cg19494591	MKRN1;MKRN1	NM_001145125;NM_013446	-0.36168	0.0115403	0.849743	2.22e-14
	cg23434428	PRKCQ	NM_006257	-0.361534	0.0115764	0.911316	2.39e-19
	cg19186056			-0.3604	0.0118594	0.882077	1.21e-16
	cg25521400	B3GNT2	NM_006577	-0.359702	0.0120365	0.936406	1.5e-22
	cg18305855	C7orf60	NM_152556	-0.359648	0.0120504	0.801642	7.6e-12
	cg09695851			-0.359585	0.0120666	0.893075	1.44e-17
	cg23111655	CAPZB	NM_004930	-0.359229	0.0121579	0.8181	1.25e-12
	cg03411376	TRPM5	NM_014555	-0.35839	0.0123757	0.807596	4.04e-12
	cg00303335			-0.357625	0.0125769	0.842529	6.01e-14
	cg22284058	SLC45A4	NM_001080431	-0.357529	0.0126024	0.845962	3.77e-14
	cg06705017			-0.357173	0.0126974	0.904776	1.14e-18
	cg12707346			-0.357163	0.0127001	0.910505	2.92e-19
	cg23598378	C6orf132	NM_001164446	-0.356567	0.0128603	0.881183	1.43e-16
	cg25199005	SMYD3;SMYD3	NM_022743;NM_001167740	-0.35607	0.0129951	0.912896	1.61e-19
	cg02516189	CARD9;CARD9;CARD9;CARD9	NM_052813;NM_052813;NM_052814;NM_052814	-0.356032	0.0130055	0.832791	2.14e-13
	cg18659081	PARVG;PARVG;PARVG	NM_001137606;NM_001137605;NM_022141	-0.356003	0.0130135	0.945945	3.95e-24
	cg15704662			-0.35548	0.0131567	0.87521	4.13e-16
	cg01211097	USP10	NM_005153	-0.355002	0.013289	0.84223	6.26e-14
	cg07456681	NTAN1	NM_173474	-0.354963	0.0133001	0.927197	3.04e-21
	cg23251798			-0.354879	0.0133233	0.842539	6.01e-14
	cg07000116	ZNF689	NM_138447	-0.354857	0.0133294	0.921949	1.42e-20
	cg15721134			-0.354608	0.0133989	0.820755	9.22e-13
	cg02878831	RPTOR;RPTOR	NM_001163034;NM_020761	-0.354191	0.0135163	0.841051	7.33e-14
	cg15602972	DACT3	NM_145056	-0.353548	0.0136984	0.880593	1.59e-16
	cg07682160	UPF1	NM_002911	-0.353524	0.0137054	0.877537	2.75e-16
	cg09684429	ROBO4	NM_019055	-0.353346	0.0137562	0.862367	3.4e-15
	cg06528823	KIF5B	NM_004521	-0.352915	0.0138801	0.910143	3.19e-19
	cg01521397	TAF4	NM_003185	-0.352652	0.0139562	0.869864	1.02e-15
	cg15920906	CUX2	NM_015267	-0.352586	0.0139753	0.890539	2.4e-17
	cg22396850	AARSD1;AARSD1;AARSD1;AARSD1	NM_001142653;NM_025267;NM_001142654;NM_001136042	-0.352564	0.0139816	0.944383	7.48e-24
	cg25084760	PCCA;PCCA	NM_001127692;NM_000282	-0.352234	0.0140777	0.915851	7.5e-20
	cg23260754			-0.351995	0.0141476	0.944066	8.49e-24
	cg16603916	ECE1;ECE1;ECE1	NM_001397;NM_001113349;NM_001113348	-0.351704	0.0142331	0.909393	3.83e-19
	cg26922854			-0.351236	0.0143716	0.889156	3.16e-17
	cg23166590			-0.350591	0.0145644	0.866106	1.88e-15
	cg09273716			-0.35036	0.0146338	0.903076	1.68e-18
	cg18115721	MRPL48	NM_016055	-0.350282	0.0146576	0.89998	3.35e-18
	cg01566692	SMG1	NM_015092	-0.349643	0.0148516	0.908808	4.41e-19
	cg20633875	KPNA6	NM_012316	-0.349449	0.014911	0.946104	3.7e-24
	cg14131038	NCK2;NCK2	NM_001004722;NM_003581	-0.348526	0.0151965	0.911672	2.18e-19
	cg00328376	SKAP2	NM_003930	-0.34844	0.0152232	0.904938	1.1e-18
	cg12156887			-0.347895	0.015394	0.850684	1.94e-14
	cg21271945	PRKCZ;PRKCZ;PRKCZ	NM_001033581;NM_001033582;NM_002744	-0.347573	0.0154957	0.871809	7.37e-16
	cg18855195	RIBC2	NM_015653	-0.347432	0.0155405	0.866248	1.84e-15
	cg07283015	HRH4;HRH4;HRH4	NM_021624;NM_001160166;NM_001143828	-0.34737	0.0155601	0.930832	9.73e-22
	cg19882784	C7orf49;C7orf49;C7orf49	NM_024033;NR_024185;NR_024186	-0.347325	0.0155746	0.90394	1.38e-18
	cg09315264	STK40	NM_032017	-0.347139	0.0156339	0.883617	9.11e-17
	cg26057969	TPRA1;TPRA1	NM_001136053;NM_001142646	-0.34676	0.0157552	0.902139	2.08e-18
	cg12806353	PLA1A	NM_015900	-0.346725	0.0157666	0.936155	1.63e-22
	cg13745346	CBFA2T3	NM_005187	-0.346559	0.0158198	0.903265	1.61e-18
	cg24575128	NISCH	NM_007184	-0.346526	0.0158305	0.933979	3.45e-22
	cg05255811	KCNK5	NM_003740	-0.346438	0.015859	0.918717	3.49e-20
	cg05651511	RPTOR;RPTOR	NM_001163034;NM_020761	-0.346385	0.0158759	0.857459	7.2e-15
	cg05729480	2019-09-09	NM_001113491	-0.346322	0.0158964	0.931459	7.94e-22
	cg02842382	HIBADH	NM_152740	-0.345891	0.0160365	0.884655	7.5e-17
	cg12405599	RPN1	NM_002950	-0.344879	0.0163694	0.883502	9.31e-17
	cg25021247	AMT;AMT;AMT;AMT;NICN1;AMT	NR_028435;NM_001164711;NM_000481;NM_001164710;NM_032316;NM_001164712	-0.344864	0.0163746	0.906593	7.47e-19
	cg01999566	DHX16;DHX16	NM_001164239;NM_003587	-0.344209	0.0165931	0.909469	3.76e-19
	cg03452168	RAG2;C11orf74	NM_000536;NM_138787	-0.344185	0.0166012	0.879359	1.99e-16
	cg15986587			-0.344152	0.0166122	0.922633	1.17e-20
	cg06030535			-0.343795	0.0167327	0.924962	5.94e-21
	cg26538140			-0.343625	0.0167903	0.916643	6.09e-20
	cg00204748	FAR2;FAR2	NM_018099;NM_018099	-0.343492	0.0168354	0.929947	1.29e-21
	cg02859319	MAPKAPK3	NM_004635	-0.34348	0.0168394	0.874394	4.75e-16
	cg04622454	NELF;NELF;NELF;NELF	NM_001130969;NM_015537;NM_001130971;NM_001130970	-0.343286	0.0169056	0.908426	4.83e-19
	cg07119973	DCAKD;DCAKD	NM_001128631;NM_024819	-0.342807	0.0170697	0.84737	3.1e-14
	cg18493214	KIF13A;KIF13A;KIF13A;KIF13A	NM_001105566;NM_022113;NM_001105568;NM_001105567	-0.342639	0.0171276	0.876709	3.18e-16
	cg17044311	ABCC2	NM_000392	-0.342638	0.0171279	0.880601	1.59e-16
	cg00142482	C10orf128	NM_001010863	-0.342565	0.0171531	0.816177	1.56e-12
	cg08299521			-0.342429	0.0172001	0.852087	1.59e-14
	cg16129132	OSBPL5;OSBPL5;OSBPL5	NM_020896;NM_001144063;NM_145638	-0.342089	0.0173181	0.919552	2.78e-20
	cg02481256	LPPR2;LPPR2	NM_001170635;NM_022737	-0.341997	0.0173501	0.853865	1.23e-14
	cg00619628	MTHFD1L	NM_015440	-0.340947	0.0177198	0.906889	6.97e-19
	cg25201363	LRPAP1	NM_002337	-0.340556	0.0178591	0.825708	5.12e-13
	cg01869896	MFSD2A;MFSD2A	NM_032793;NM_001136493	-0.340323	0.0179423	0.926507	3.74e-21
	cg14268557	TRIM27	NM_006510	-0.340229	0.0179763	0.931252	8.49e-22
	cg18521796	KIAA1257	NM_020741	-0.340036	0.0180458	0.86146	3.92e-15
	cg11081833	LGALS2;LGALS2	NM_006498;NM_006498	-0.339723	0.0181588	0.86412	2.58e-15
	cg10142237	CSNK1E;CSNK1E	NM_001894;NM_152221	-0.339296	0.0183142	0.93387	3.58e-22
	cg13785123	ENO1	NM_001428	-0.338892	0.0184621	0.881579	1.33e-16
	cg05196835	TBC1D1	NM_015173	-0.338798	0.0184969	0.807001	4.31e-12
	cg00791854	IL6R;IL6R	NM_181359;NM_000565	-0.338681	0.0185399	0.849075	2.44e-14
	cg27000690	PACSIN1	NM_020804	-0.338272	0.0186913	0.912025	2e-19
	cg18805734	FAM60A;FAM60A;FAM60A	NM_021238;NM_001135811;NM_001135812	-0.338262	0.0186949	0.83829	1.06e-13
	cg07995200			-0.337483	0.0189861	0.917999	4.24e-20
	cg17496921	TSPAN16	NM_012466	-0.337474	0.0189895	0.942425	1.62e-23
	cg15334250	EPHB3	NM_004443	-0.337402	0.0190166	0.925427	5.17e-21
	cg09704136	ZYX;ZYX	NM_003461;NM_001010972	-0.337346	0.019038	0.900938	2.71e-18
	cg00499707			-0.337271	0.0190661	0.835222	1.57e-13
	cg16277071			-0.337159	0.0191084	0.881871	1.26e-16
	cg07349663	COPA;COPA	NM_004371;NM_001098398	-0.337113	0.0191261	0.94232	1.69e-23
	cg14787269			-0.337093	0.0191334	0.930013	1.26e-21
	cg06672250	EPB49;EPB49;EPB49;EPB49	NM_001114135;NM_001114136;NM_001114139;NM_001114137	-0.336981	0.019176	0.863944	2.66e-15
	cg03340408	NAV1	NM_020443	-0.336898	0.0192076	0.862648	3.25e-15
	cg13984746	HEXDC	NM_173620	-0.336598	0.0193217	0.928522	2.02e-21
	cg22840216			-0.336513	0.0193543	0.818822	1.15e-12
	cg00434119	DGKG;DGKG;DGKG	NM_001346;NM_001080744;NM_001080745	-0.335725	0.0196578	0.89497	9.75e-18
	cg09113070	ST3GAL5	NM_003896	-0.335407	0.0197813	0.879163	2.06e-16
	cg21926619	TTC25	NM_031421	-0.334972	0.0199514	0.852065	1.59e-14
	cg10767665	KCNN4	NM_002250	-0.334895	0.0199819	0.87288	6.15e-16
	cg26542091	UPF1	NM_002911	-0.334827	0.0200085	0.91141	2.33e-19
	cg19737225	ANKLE1	NM_152363	-0.334688	0.0200632	0.826944	4.41e-13
	cg27180555			-0.334157	0.0202735	0.944259	7.86e-24
	cg02769743	TMEM201	NM_001130924	-0.333419	0.0205688	0.926509	3.74e-21
	cg26638570	BAHCC1	NM_001080519	-0.333389	0.0205811	0.883422	9.45e-17
	cg14266156			-0.333248	0.0206379	0.835358	1.54e-13
	cg01876978			-0.333204	0.0206556	0.832957	2.1e-13
	cg07176064	HMGXB4;HMGXB4	NR_027780;NM_001003681	-0.332461	0.0209577	0.86948	1.09e-15
	cg05292082	TIAM1	NM_003253	-0.332448	0.020963	0.886756	5.03e-17
	cg25119743	CUGBP2;CUGBP2	NM_001025077;NM_006561	-0.332347	0.0210043	0.858368	6.28e-15
	cg16097041	FLAD1;LENEP;FLAD1	NM_025207;NM_018655;NM_201398	-0.332202	0.0210638	0.930578	1.05e-21
	cg21697512	CD34;CD34	NM_001025109;NM_001773	-0.332055	0.0211246	0.912595	1.73e-19
	cg21067963	CARS2	NM_024537	-0.332001	0.0211465	0.875373	4.01e-16
	cg08473752	NLK	NM_016231	-0.331895	0.0211903	0.902909	1.75e-18
	cg04638014	ARL9	NM_206919	-0.3318	0.0212295	0.905076	1.06e-18
	cg12694124	TSC22D1	NM_183422	-0.3316	0.0213126	0.80738	4.14e-12
	cg04735908	ACIN1;ACIN1;ACIN1;ACIN1;ACIN1	NM_001164817;NM_001164815;NM_014977;NM_001164816;NM_001164814	-0.331482	0.0213613	0.871531	7.73e-16
	cg01206723			-0.331473	0.0213652	0.880968	1.48e-16
	cg16762030			-0.331359	0.0214127	0.948344	1.43e-24
	cg00510149	MRVI1;MRVI1;MRVI1;MRVI1	NM_001100163;NM_001098579;NM_130385;NM_001100167	-0.331049	0.0215421	0.893212	1.4e-17
	cg02237172	ZMYND10	NM_015896	-0.331034	0.0215486	0.822012	7.96e-13
	cg26017506	ASB14;ASB14	NM_130387;NM_001142733	-0.33071	0.0216844	0.883241	9.78e-17
	cg11731437			-0.330706	0.0216864	0.89228	1.69e-17
	cg13089335	POU2F1	NM_002697	-0.330605	0.0217289	0.869261	1.13e-15
	cg17069873	CNTD2	NM_024877	-0.330207	0.0218973	0.915175	8.95e-20
	cg14700707	NOTCH4;NOTCH4	NM_004557;NM_004557	-0.330119	0.0219345	0.923607	8.83e-21
	cg20476021			-0.330065	0.0219574	0.816538	1.5e-12
	cg09849688	ARID1A;ARID1A	NM_006015;NM_139135	-0.330029	0.0219726	0.864284	2.52e-15
	cg17222829	SHANK2;SHANK2	NM_012309;NM_133266	-0.330009	0.0219812	0.828427	3.68e-13
	cg11922563			-0.329686	0.0221192	0.908294	4.99e-19
	cg16967583	AGXT	NM_000030	-0.329475	0.0222096	0.928916	1.79e-21
	cg18828619	PELI2	NM_021255	-0.32932	0.0222764	0.917002	5.53e-20
	cg19925518			-0.328858	0.0224763	0.842791	5.8e-14
	cg00083659	C22orf33;C22orf33	NM_178552;NM_001163857	-0.328851	0.0224791	0.835676	1.48e-13
	cg12262372	NFIA	NM_001145511	-0.328489	0.0226367	0.817262	1.38e-12
	cg22594985			-0.328089	0.0228117	0.805317	5.16e-12
	cg26233331	S100P;S100P	NM_005980;NM_005980	-0.328041	0.0228331	0.920264	2.28e-20
	cg06987053	CA5A	NM_001739	-0.328022	0.0228412	0.923248	9.8e-21
	cg26023268	CPSF4L	NM_001129885	-0.327842	0.0229207	0.817242	1.38e-12
	cg22045288	C10orf91	NM_173541	-0.327807	0.0229359	0.893936	1.21e-17
	cg07773434	PPP1R14B	NM_138689	-0.327452	0.023093	0.894808	1.01e-17
	cg27366162	ARSG	NM_014960	-0.327297	0.0231619	0.930034	1.26e-21
	cg19219366	TRIM3;TRIM3	NM_006458;NM_033278	-0.327112	0.0232446	0.838967	9.66e-14
	cg08064068			-0.327098	0.0232506	0.872191	6.91e-16
	cg20107506			-0.326771	0.0233974	0.91596	7.29e-20
	cg04044203	ESAM	NM_138961	-0.326664	0.0234455	0.871669	7.55e-16
	cg08231648			-0.326502	0.0235182	0.928502	2.03e-21
	cg16684817	C1orf38;C1orf38;C1orf38	NM_001105556;NM_001039477;NM_004848	-0.326388	0.0235696	0.896798	6.65e-18
	cg20246851	SEMA4B	NM_020210	-0.326384	0.0235713	0.857597	7.06e-15
	cg11147155	ENSA;ENSA;ENSA;ENSA	NM_207045;NM_207042;NM_004436;NM_207046	-0.326149	0.0236776	0.889691	2.84e-17
	cg18947209			-0.3261	0.0237001	0.89734	5.92e-18
	cg06233202			-0.325788	0.023842	0.90913	4.08e-19
	cg18022893	RNF220	NM_018150	-0.325762	0.0238536	0.908658	4.57e-19
	cg01517832	TOLLIP;LOC255512	NM_019009;NR_029409	-0.325671	0.0238954	0.870578	9.06e-16
	cg01620248	ZBTB42	NM_001137601	-0.325447	0.023998	0.884306	8.01e-17
	cg13682345	LRRC8C	NM_032270	-0.325052	0.0241795	0.877561	2.74e-16
	cg10420527	LRP5	NM_002335	-0.32479	0.0243006	0.911118	2.51e-19
	cg13840419			-0.324506	0.0244325	0.831787	2.43e-13
	cg13059136	SNORA54;NAP1L4	NR_002982;NM_005969	-0.324353	0.0245038	0.925909	4.48e-21
	cg03655701	C1orf130	NM_001010980	-0.32389	0.0247205	0.931077	8.99e-22
	cg20640261	MSH5;MSH5;MSH5;MSH5	NM_025259;NM_002441;NM_172165;NM_172166	-0.323786	0.0247695	0.857437	7.23e-15
	cg25670076	BACH2;BACH2	NM_021813;NM_001170794	-0.323587	0.0248632	0.916782	5.87e-20
	cg00704780	HDLBP;HDLBP	NM_203346;NM_005336	-0.323545	0.0248829	0.875811	3.72e-16
	cg04858148	PRDM8	NM_020226	-0.32319	0.0250513	0.905441	9.78e-19
	cg13569051	GSN;GSN;GSN;GSN;GSN;GSN;GSN	NM_001127664;NM_001127667;NM_001127662;NM_198252;NM_001127665;NM_001127663;NM_001127666	-0.322898	0.0251906	0.865544	2.06e-15
	cg22894805	MGA;MGA;MIR626	NM_001080541;NM_001164273;NR_030356	-0.322651	0.0253085	0.916923	5.65e-20
	cg26861460	PARVG;PARVG;PARVG;PARVG	NM_022141;NM_001137605;NR_024427;NR_024426	-0.322528	0.0253674	0.927397	2.86e-21
	cg11639615			-0.322516	0.0253735	0.848118	2.79e-14
	cg08944026	ANKRD33B	NM_001164440	-0.322484	0.0253889	0.950884	4.6e-25
	cg08574558			-0.322315	0.0254699	0.902159	2.07e-18
	cg16395997	WDR8	NM_017818	-0.322315	0.0254699	0.817603	1.33e-12
	cg04881903	CAPG	NM_001747	-0.322049	0.0255986	0.852349	1.53e-14
	cg11739399	IKBKE	NM_014002	-0.321689	0.0257735	0.876365	3.38e-16
	cg25725418			-0.321675	0.02578	0.864206	2.55e-15
	cg11180667			-0.321648	0.025793	0.933313	4.31e-22
	cg04962621	MGRN1;MGRN1;MGRN1;MGRN1	NM_015246;NM_001142291;NM_001142290;NM_001142289	-0.321525	0.0258533	0.901258	2.53e-18
	cg00967073			-0.321417	0.0259061	0.874537	4.64e-16
	cg17823175	AZU1	NM_001700	-0.32134	0.0259434	0.915176	8.95e-20
	cg10168457	MAFG;MAFG	NM_032711;NM_002359	-0.321268	0.025979	0.810697	2.88e-12
	cg17631451	TREX1;TREX1;TREX1;TREX1	NM_033629;NM_016381;NM_033629;NM_016381	-0.321019	0.026101	0.811331	2.69e-12
	cg24013213	GUCY1B2	NR_003923	-0.320666	0.026275	0.805111	5.28e-12
	cg08209473	SIAH1;SIAH1;SIAH1	NM_001006610;NM_001006610;NM_003031	-0.320516	0.0263495	0.819405	1.08e-12
	cg01486260	ITGAX	NM_000887	-0.320452	0.0263812	0.837756	1.13e-13
	cg27055685	PFDN6;WDR46;WDR46	NM_014260;NM_001164267;NM_005452	-0.32031	0.0264518	0.873055	5.97e-16
	cg19695041	TACC1	NM_001146216	-0.320194	0.0265097	0.827368	4.19e-13
	cg01581098	SYPL1	NM_006754	-0.319894	0.0266592	0.879328	2e-16
	cg04710179	TBC1D1	NM_015173	-0.319795	0.0267088	0.9216	1.57e-20
	cg20507228	MAN2A2	NM_006122	-0.319766	0.0267232	0.902995	1.71e-18
	cg14089110	ASGR2;ASGR2;ASGR2;ASGR2	NM_080914;NM_001181;NM_080912;NM_080913	-0.31954	0.026837	0.919325	2.95e-20
	cg26921611	EIF4EBP1	NM_004095	-0.319278	0.0269691	0.824118	6.2e-13
	cg10763374	COMMD3;BMI1	NM_012071;NM_005180	-0.319215	0.0270009	0.913511	1.37e-19
	cg24964103	VNN1	NM_004666	-0.31921	0.0270036	0.878836	2.18e-16
	cg09169633	MAN2A2	NM_006122	-0.3192	0.0270086	0.933249	4.41e-22
	cg23590660	FOXJ2	NM_018416	-0.31918	0.0270187	0.91516	8.98e-20
	cg16004377	LGALS12;LGALS12;LGALS12	NM_033101;NM_001142535;NM_001142536	-0.319023	0.0270984	0.955196	5.82e-26
	cg11061343	C17orf106	NM_001113324	-0.31894	0.0271404	0.923972	7.94e-21
	cg26615176	SLC25A45;SLC25A45	NM_001077241;NM_182556	-0.318886	0.027168	0.865432	2.1e-15
	cg03739609	LST1;LST1;LST1;LST1;LST1;LST1;LST1;LST1;LST1;LST1;LST1	NR_029461;NM_007161;NM_205839;NM_205838;NM_001166538;NR_029462;NM_205840;NM_205837;NM_001166538;NM_007161;NM_205840	-0.318724	0.0272502	0.927192	3.04e-21
	cg02307597	ABHD8	NM_024527	-0.318676	0.0272747	0.837101	1.23e-13
	cg13981787	SIGLEC12	NM_053003	-0.318258	0.0274891	0.806417	4.59e-12
	cg04466484			-0.318006	0.0276187	0.805096	5.28e-12
	cg00135888	MIR130A	NR_029673	-0.317998	0.0276229	0.843951	4.96e-14
	cg00855901	IFI44L	NM_006820	-0.317697	0.0277785	0.851053	1.84e-14
	cg10070185	SERPINA1;SERPINA1;SERPINA1;SERPINA1;SERPINA1;SERPINA1;SERPINA1;SERPINA1;SERPINA1;SERPINA1	NM_001127706;NM_001127704;NM_001127700;NM_001127701;NM_001127707;NM_001002235;NM_001127703;NM_001127705;NM_001127702;NM_001002236	-0.317617	0.0278197	0.85093	1.87e-14
	cg13522406	PPP1R10	NM_002714	-0.317552	0.0278534	0.846985	3.27e-14
	cg02551745			-0.317419	0.0279225	0.898254	4.87e-18
	cg07313319	CSNK1E;CSNK1E	NM_001894;NM_152221	-0.317367	0.0279495	0.843955	4.96e-14
	cg07624424	HSPA1L	NM_005527	-0.317257	0.028007	0.871495	7.77e-16
	cg08170911	PRKCD;PRKCD	NM_212539;NM_006254	-0.31702	0.0281308	0.925049	5.79e-21
	cg16669602			-0.316997	0.0281426	0.885417	6.5e-17
	cg23857896			-0.316909	0.0281889	0.815529	1.68e-12
	cg00500176	ICAM4;ICAM4;ICAM4;ICAM1	NM_001039132;NM_001544;NM_022377;NM_000201	-0.316888	0.0281998	0.944028	8.62e-24
	cg18806193	CLPTM1L	NM_030782	-0.3165	0.0284044	0.890314	2.51e-17
	cg16947394	TMEM110	NM_198563	-0.316462	0.0284242	0.937842	8.99e-23
	cg26449680	CSNK1E;CSNK1E	NM_001894;NM_152221	-0.316246	0.0285383	0.895361	8.99e-18
	cg08477158	BCAS3;BCAS3	NM_001099432;NM_017679	-0.316227	0.0285487	0.924903	6.04e-21
	cg13084677	LOC401127	NR_026854	-0.31621	0.0285577	0.888502	3.59e-17
	cg14272075	RNF126P1	NR_002818	-0.316041	0.0286474	0.930631	1.04e-21
	cg08220149	NDE1;NDE1	NM_017668;NM_001143979	-0.315757	0.0287985	0.893551	1.31e-17
	cg22678754			-0.315585	0.0288905	0.884741	7.38e-17
	cg02835421	IPO13	NM_014652	-0.315499	0.0289368	0.869385	1.1e-15
	cg18410271	ARHGAP27;ARHGAP27	NM_199282;NM_001159330	-0.315318	0.0290336	0.880698	1.56e-16
	cg07879785	CRYL1	NM_015974	-0.315275	0.0290567	0.932366	5.9e-22
	cg27288091	COX4I1	NM_001861	-0.315153	0.0291228	0.854791	1.07e-14
	cg06068801	PPP1R1B;PPP1R1B	NM_181505;NM_032192	-0.315143	0.029128	0.894349	1.11e-17
	cg11908131	C2orf40	NM_032411	-0.315074	0.0291653	0.913121	1.52e-19
	cg19023589	TMCO3	NM_017905	-0.314723	0.029355	0.923506	9.09e-21
	cg04904784			-0.314228	0.0296244	0.925458	5.13e-21
	cg12970512	TRAF3;TRAF3;TRAF3	NM_145726;NM_003300;NM_145725	-0.314222	0.0296281	0.892014	1.79e-17
	cg20849109	KBTBD11	NM_014867	-0.314044	0.0297254	0.908809	4.41e-19
	cg07531182	XYLT1	NM_022166	-0.313976	0.0297624	0.925331	5.32e-21
	cg24777399	SH3RF3	NM_001099289	-0.313915	0.0297959	0.906847	7.04e-19
	cg08908247	YIF1A	NM_020470	-0.313525	0.0300107	0.943306	1.15e-23
	cg09888840	SLC43A1	NM_003627	-0.313488	0.0300316	0.904744	1.15e-18
	cg23362032			-0.313477	0.0300374	0.926539	3.71e-21
	cg16100392	TAAR3	NR_028511	-0.312939	0.0303363	0.841352	7.04e-14
	cg23684449	GPT2;GPT2;GPT2	NM_133443;NM_001142466;NM_001142466	-0.312753	0.0304398	0.892408	1.65e-17
	cg00637104			-0.3125	0.0305815	0.937436	1.04e-22
	cg08106108	RNMTL1	NM_018146	-0.312451	0.0306095	0.888763	3.41e-17
	cg03572260	STARD3;STARD3;STARD3	NM_006804;NM_001165937;NM_001165938	-0.31245	0.0306099	0.953142	1.6e-25
	cg16305292			-0.312262	0.0307153	0.924116	7.62e-21
	cg10552698	PDHB	NM_000925	-0.31204	0.0308405	0.819291	1.09e-12
	cg23752007	ELMO1	NM_014800	-0.312035	0.0308435	0.815895	1.61e-12
	cg18688704	PDGFC	NM_016205	-0.311897	0.0309219	0.823902	6.36e-13
	cg26417554	RPUSD3;RPUSD3	NM_001142547;NM_173659	-0.311705	0.0310308	0.886349	5.44e-17
	cg24259291	ZNFX1	NM_021035	-0.31154	0.0311244	0.925632	4.87e-21
	cg04764812			-0.31144	0.0311813	0.928055	2.33e-21
	cg25535106	GTF3C2;GTF3C2	NM_001035521;NM_001521	-0.31144	0.0311817	0.891816	1.86e-17
	cg23369670	XRCC3;XRCC3;XRCC3	NM_001100119;NM_005432;NM_001100118	-0.311343	0.0312369	0.947059	2.48e-24
	cg21519701	TEX2	NM_018469	-0.311097	0.0313777	0.94577	4.25e-24
	cg13327134	RARG	NM_000966	-0.310976	0.0314473	0.862797	3.18e-15
	cg26079320	POGK	NM_017542	-0.31086	0.0315136	0.850941	1.87e-14
	cg01519094	PKNOX2	NM_022062	-0.310635	0.0316432	0.886979	4.82e-17
	cg02246876	CEBPE	NM_001805	-0.3106	0.0316634	0.855838	9.17e-15
	cg18818075			-0.310523	0.0317079	0.920846	1.94e-20
	cg08947894			-0.310394	0.0317826	0.818723	1.17e-12
	cg14222432	FAR2	NM_018099	-0.310385	0.0317881	0.866276	1.83e-15
	cg23530553	HOXB2	NM_002145	-0.31028	0.031849	0.922926	1.08e-20
	cg00916854	VPS37B	NM_024667	-0.310116	0.0319445	0.937092	1.17e-22
	cg16452651	ITSN1;ITSN1	NM_003024;NM_001001132	-0.310107	0.0319493	0.937793	9.15e-23
	cg18169971	H2AFY;H2AFY;H2AFY;H2AFY	NM_004893;NM_001040158;NM_138610;NM_138609	-0.310022	0.0319992	0.900574	2.94e-18
	cg18926797	DCAF5	NM_003861	-0.309813	0.0321212	0.912586	1.74e-19
	cg16768966	GAS7;GAS7	NM_201433;NM_201432	-0.30975	0.0321579	0.925811	4.61e-21
	cg24840601	SUMF1;SUMF1;SUMF1	NM_001164675;NM_182760;NM_001164674	-0.309585	0.0322546	0.811374	2.68e-12
	cg13741304	ARRDC1	NM_152285	-0.309478	0.0323173	0.93789	8.83e-23
	cg00154119			-0.309139	0.0325171	0.945277	5.2e-24
	cg03962451	GLS	NM_014905	-0.30905	0.0325696	0.910361	3.02e-19
	cg21072795	NCKAP1L	NM_005337	-0.308808	0.0327128	0.929642	1.42e-21
	cg06336535	FCHO1;FCHO1;FCHO1;FCHO1	NM_015122;NM_001161358;NM_001161359;NM_001161357	-0.308723	0.0327633	0.844863	4.38e-14
	cg16347155	NAGLU	NM_000263	-0.308411	0.032949	0.894264	1.13e-17
	cg02175033	KIAA0247	NM_014734	-0.308303	0.0330139	0.914416	1.09e-19
	cg08164191			-0.308281	0.0330268	0.905339	1e-18
	cg17741629	SETDB2;SETDB2	NM_001160308;NM_031915	-0.308111	0.0331285	0.816781	1.46e-12
	cg01574390	METTL9;METTL9	NM_001077180;NM_016025	-0.308027	0.0331792	0.924633	6.54e-21
	cg10447327	LANCL1;LANCL1;LANCL1	NM_001136574;NM_006055;NM_001136575	-0.307943	0.0332296	0.918349	3.85e-20
	cg12249234	KSR1	NM_014238	-0.307742	0.0333507	0.918249	3.96e-20
	cg24776142	ATXN1;ATXN1	NM_001128164;NM_000332	-0.307134	0.033719	0.817801	1.3e-12
	cg19735804			-0.306496	0.0341092	0.839331	9.21e-14
	cg16899991			-0.306316	0.0342196	0.901551	2.37e-18
	cg16506970	KIAA0232;KIAA0232	NM_014743;NM_001100590	-0.306275	0.0342452	0.92952	1.48e-21
	cg21073459	OSCAR;OSCAR;OSCAR;OSCAR;OSCAR;OSCAR;OSCAR;OSCAR	NM_133168;NM_206818;NM_133169;NM_130771;NM_133169;NM_130771;NM_133168;NM_206818	-0.306275	0.0342453	0.823016	7.07e-13
	cg18554789	HIPK2;HIPK2	NM_001113239;NM_022740	-0.306272	0.0342471	0.935426	2.1e-22
	cg13393678			-0.306206	0.0342874	0.851119	1.82e-14
	cg16928487	SREBF1;SREBF1	NM_001005291;NM_004176	-0.305892	0.0344821	0.939427	5.05e-23
	cg19464524	CPEB3	NM_014912	-0.305734	0.0345797	0.871617	7.62e-16
	cg11801411	WDR81;WDR81;WDR81;WDR81	NM_001163673;NM_001163809;NM_001163811;NM_152348	-0.30573	0.0345825	0.869901	1.01e-15
	cg03154580	RALB	NM_002881	-0.305513	0.0347174	0.907907	5.47e-19
	cg03082779	ZMYND8;LOC100131496;ZMYND8;ZMYND8	NM_183048;NR_024594;NM_183047;NM_012408	-0.305316	0.0348402	0.944	8.72e-24
	cg20283498	CDH23;CDH23	NM_052836;NM_022124	-0.305194	0.0349169	0.951261	3.87e-25
	cg17380091	REXO1	NM_020695	-0.305107	0.0349715	0.872133	6.98e-16
	cg20795701	C6orf10	NM_006781	-0.305032	0.0350185	0.89334	1.37e-17
	cg09358725	LMO2	NM_005574	-0.304941	0.0350753	0.940642	3.21e-23
	cg00401678	EMR3	NM_032571	-0.304884	0.0351115	0.871351	7.96e-16
	cg02639080	TRIM27	NM_006510	-0.304811	0.0351576	0.861142	4.11e-15
	cg16498504			-0.304741	0.0352014	0.90794	5.43e-19
	cg06178887	POU2F2	NM_002698	-0.304739	0.0352025	0.923113	1.02e-20
	cg23386659	PRTN3	NM_002777	-0.304732	0.0352071	0.824661	5.81e-13
	cg07512993	TK2	NM_004614	-0.304452	0.0353838	0.955862	4.15e-26
	cg19238325	GPR62	NM_080865	-0.304111	0.0356007	0.868287	1.32e-15
	cg11254053	AK2;AK2	NM_013411;NM_001625	-0.304021	0.0356575	0.93416	3.24e-22
	cg11305121	RALB	NM_002881	-0.304003	0.035669	0.872909	6.12e-16
	cg07769015	SLC45A4	NM_001080431	-0.303894	0.0357389	0.939111	5.67e-23
	cg11094248	RARA;RARA;RARA	NM_001145301;NM_000964;NM_001145302	-0.303839	0.0357737	0.8111	2.76e-12
	cg20962292	PSMB9;PSMB9	NM_002800;NM_148954	-0.303833	0.0357776	0.856205	8.69e-15
	cg05126095	AQP2	NM_000486	-0.303564	0.0359498	0.897863	5.3e-18
	cg04172533	NOD2	NM_022162	-0.303544	0.0359631	0.889117	3.18e-17
	cg25349990			-0.303507	0.0359869	0.873784	5.27e-16
	cg17904988	NDUFS2;ADAMTS4;ADAMTS4	NM_004550;NM_005099;NM_005099	-0.303423	0.0360409	0.930746	1e-21
	cg07296841			-0.303398	0.0360568	0.801759	7.51e-12
	cg18770579	C19orf76;PRMT1;PRMT1;PRMT1	NM_001101340;NM_198318;NM_198319;NM_001536	-0.303262	0.036144	0.809184	3.4e-12
	cg08173709	FOXP1	NM_032682	-0.303205	0.0361807	0.92567	4.81e-21
	cg05533539	MAPT;MAPT;MAPT;MAPT;MAPT;MAPT	NM_001123066;NM_016835;NM_005910;NM_001123067;NM_016834;NM_016841	-0.302973	0.0363312	0.938131	8.1e-23
	cg16814786	NCOA4;NCOA4;NCOA4;NCOA4;NCOA4	NM_005437;NM_001145263;NM_001145261;NM_001145262;NM_001145260	-0.302887	0.0363864	0.893449	1.34e-17
	cg10533990	FOLR3	NM_000804	-0.302722	0.0364934	0.940607	3.25e-23
	cg01477971	TMEM182	NM_144632	-0.302685	0.0365178	0.928071	2.32e-21
	cg07379703	ARSB;ARSB	NM_000046;NM_198709	-0.302644	0.0365442	0.918617	3.58e-20
	cg05674199	AHCY;AHCY	NM_001161766;NM_000687	-0.302619	0.0365606	0.849502	2.3e-14
	cg08136416			-0.302603	0.0365708	0.930613	1.04e-21
	cg15136975	CAPZB	NM_004930	-0.302483	0.0366494	0.823021	7.06e-13
	cg04999421	PGS1	NM_024419	-0.302466	0.0366604	0.865662	2.02e-15
	cg12866960	IRAK3;IRAK3	NM_001142523;NM_007199	-0.302443	0.036675	0.922688	1.15e-20
	cg00899659	C10orf25;ZNF22	NM_001039380;NM_006963	-0.302378	0.0367177	0.884899	7.17e-17
	cg12798040	XRCC3;XRCC3;XRCC3	NM_001100119;NM_005432;NM_001100118	-0.302294	0.0367724	0.820585	9.41e-13
	cg15382933	CD59;CD59;CD59;CD59;CD59;CD59;CD59;CD59	NM_203330;NM_001127225;NM_203329;NM_001127226;NM_000611;NM_001127223;NM_001127227;NM_203331	-0.30227	0.0367883	0.905621	9.38e-19
	cg16618493	ZBTB7B	NM_015872	-0.302117	0.0368883	0.913002	1.56e-19
	cg14464245	AGPAT2;AGPAT2	NM_006412;NM_001012727	-0.302052	0.0369311	0.946207	3.54e-24
	cg25049733	GMDS	NM_001500	-0.301965	0.0369878	0.812495	2.36e-12
	cg03382501	TXNDC11	NM_015914	-0.301821	0.0370828	0.875657	3.82e-16
	cg10389644	MAFK	NM_002360	-0.30173	0.0371426	0.903818	1.42e-18
	cg21610839	UBE2E1;UBE2E1	NM_003341;NM_182666	-0.301722	0.0371477	0.807146	4.24e-12
	cg18964319			-0.301619	0.0372159	0.901463	2.42e-18
	cg11366934	BRI3;BRI3	NM_015379;NM_001159491	-0.301445	0.0373308	0.807938	3.9e-12
	cg18222653			-0.301417	0.0373496	0.901362	2.47e-18
	cg05343404	TBXA2R;TBXA2R	NM_201636;NM_001060	-0.301353	0.0373918	0.914939	9.52e-20
	cg17681750	MACROD1	NM_014067	-0.301272	0.0374453	0.829577	3.2e-13
	cg17848797	UBE2J2;UBE2J2;LOC100128842;UBE2J2;UBE2J2	NM_194457;NM_194315;NR_027361;NM_194458;NM_058167	-0.301252	0.0374589	0.915686	7.83e-20
	cg13914004	ST6GALNAC6	NM_013443	-0.301161	0.0375192	0.867358	1.54e-15
	cg25865108			-0.30105	0.0375929	0.8308	2.75e-13
	cg24352369	LOC440839	NR_029399	-0.300926	0.0376757	0.836991	1.25e-13
	cg09578155	LRP5	NM_002335	-0.300857	0.0377215	0.824107	6.21e-13
	cg18568335	PACS2;PACS2	NM_015197;NM_001100913	-0.300641	0.0378663	0.936718	1.34e-22
	cg10646422			-0.300635	0.0378703	0.917836	4.43e-20
	cg25006077	MBNL1;MBNL1;MBNL1;MBNL1;MBNL1;MBNL1;MBNL1	NM_207295;NM_207293;NM_021038;NM_207292;NM_207296;NM_207297;NM_207294	-0.300625	0.0378771	0.932083	6.48e-22
	cg04205769	DPH5;DPH5;DPH5	NM_001077395;NM_015958;NM_001077394	-0.30056	0.0379205	0.913889	1.25e-19
	cg19223782	RNH1;RNH1;RNH1;RNH1;RNH1;RNH1;RNH1;RNH1	NM_203384;NM_203385;NM_203387;NM_203388;NM_203383;NM_203389;NM_002939;NM_203386	-0.300503	0.0379588	0.81164	2.6e-12
	cg03068319	FAM8A1	NM_016255	-0.300357	0.0380567	0.834734	1.67e-13
	cg12729838	CLU;CLU;CLU;CLU	NM_001171138;NM_001831;NM_001171138;NM_203339	-0.300267	0.038117	0.89429	1.12e-17
	cg21382392	ETV3L;ETV3L	NM_001004341;NM_001004341	-0.300162	0.0381878	0.9014	2.45e-18
	cg22406102			-0.30011	0.0382229	0.824946	5.61e-13
	cg02832357	STAT5B	NM_012448	-0.29998	0.0383109	0.931879	6.93e-22
	cg26833883	FLAD1;LENEP;FLAD1	NM_025207;NM_018655;NM_201398	-0.299861	0.0383916	0.840918	7.46e-14
	cg17494897	TSSC1	NM_003310	-0.299763	0.038458	0.88552	6.37e-17
	cg00420997	C8orf75	NR_026765	-0.299594	0.0385725	0.844522	4.59e-14
	cg21640432	FFAR2	NM_005306	-0.299513	0.0386278	0.930676	1.02e-21
	cg25915871	PTRH2	NM_016077	-0.299482	0.038649	0.849285	2.37e-14
	cg00785482			-0.29941	0.0386979	0.922858	1.1e-20
	cg22989958	DOK1	NM_001381	-0.299357	0.038734	0.953496	1.35e-25
	cg24621362	LTBR	NM_002342	-0.299239	0.0388147	0.877784	2.63e-16
	cg24043628			-0.299201	0.0388406	0.836445	1.34e-13
	cg15888569	CPEB2;CPEB2	NM_182646;NM_182485	-0.298876	0.0390632	0.880678	1.57e-16
	cg11184109	RFT1	NM_052859	-0.298818	0.0391034	0.821758	8.2e-13
	cg16624482	UMODL1;UMODL1	NM_173568;NM_001004416	-0.298791	0.039122	0.829785	3.11e-13
	cg00253228	PLEC1;PLEC1;PLEC1;PLEC1	NM_000445;NM_201378;NM_201379;NM_201380	-0.298765	0.0391395	0.933655	3.85e-22
	cg04903089	HLA-DMB	NM_002118	-0.298707	0.0391794	0.931422	8.04e-22
	cg20130744	PLXDC2	NM_032812	-0.298584	0.0392644	0.868295	1.32e-15
	cg08952844			-0.298368	0.0394134	0.943049	1.27e-23
	cg00201133	CCNY;CCNY	NM_145012;NM_181698	-0.29832	0.0394469	0.931358	8.21e-22
	cg26686150			-0.298253	0.0394933	0.907406	6.17e-19
	cg24768050	LOC401127	NR_026854	-0.298186	0.0395394	0.840299	8.1e-14
	cg25642069	TOP1MT	NM_052963	-0.298119	0.0395865	0.943089	1.25e-23
	cg18118738	UHRF1BP1	NM_017754	-0.297984	0.0396801	0.877219	2.91e-16
	cg25853622	LPP;LPP;LPP	NM_005578;NM_001167671;NM_001167672	-0.297983	0.0396805	0.923995	7.89e-21
	cg01734045	COL25A1;COL25A1	NM_198721;NM_032518	-0.297874	0.0397567	0.836343	1.36e-13
	cg15958424	ACPP;ACPP	NM_001099;NM_001134194	-0.297819	0.0397951	0.883575	9.19e-17
	cg16696476	RANGRF;SLC25A35	NM_016492;NM_201520	-0.297497	0.0400198	0.821062	8.9e-13
	cg27516100	DHX16;DHX16	NM_001164239;NM_003587	-0.297448	0.0400546	0.938843	6.25e-23
	cg12156512	FKRP;FKRP	NM_001039885;NM_024301	-0.297431	0.0400661	0.862852	3.15e-15
	cg01450522			-0.297128	0.0402791	0.903959	1.38e-18
	cg04676766	TIGD4	NM_145720	-0.297068	0.0403217	0.869175	1.14e-15
	cg01253753	CLEC4D;CLEC4D	NM_080387;NM_080387	-0.297059	0.0403277	0.922838	1.1e-20
	cg12612122	NECAP1;NECAP1	NR_024260;NM_015509	-0.296969	0.0403915	0.848252	2.74e-14
	cg05532239	CCT3;C1orf182;CCT3;CCT3	NM_001008800;NM_144627;NM_001008883;NM_005998	-0.296962	0.0403965	0.895936	7.97e-18
	cg20874785	LOC100189589	NR_024463	-0.296833	0.0404876	0.915462	8.31e-20
	cg03764364			-0.296783	0.0405231	0.828371	3.71e-13
	cg01765641	TBC1D5;TBC1D5;TBC1D5	NM_014744;NM_014744;NM_001134380	-0.296715	0.0405711	0.832422	2.24e-13
	cg11849798	ZNF706;ZNF706;ZNF706	NM_001042510;NM_001042511;NM_016096	-0.29666	0.0406103	0.830833	2.73e-13
	cg04341343			-0.296519	0.0407105	0.883914	8.62e-17
	cg09359351	HSPBAP1	NM_024610	-0.29622	0.0409235	0.925836	4.58e-21
	cg09122223	IL18	NM_001562	-0.296094	0.0410133	0.838394	1.04e-13
	cg20748065	POR	NM_000941	-0.296072	0.0410292	0.863883	2.68e-15
	cg06294475	KCNQ1;KCNQ1OT1;KCNQ1	NM_000218;NR_002728;NM_181798	-0.296051	0.0410437	0.905482	9.69e-19
	cg25079915	TMEM37	NM_183240	-0.29602	0.0410661	0.887687	4.21e-17
	cg15390816	NCOR2;NCOR2	NM_006312;NM_001077261	-0.295938	0.0411248	0.817734	1.31e-12
	cg13679804			-0.295897	0.041154	0.864477	2.44e-15
	cg19700872	GPR151	NM_194251	-0.295871	0.0411726	0.847387	3.09e-14
	cg11831182	LMNA;LMNA;LMNA	NM_005572;NM_170707;NM_170708	-0.295739	0.0412679	0.810118	3.07e-12
	cg13630493	CLTA;CLTA;CLTA	NM_007096;NM_001833;NM_001076677	-0.295692	0.0413011	0.871814	7.37e-16
	cg27020966			-0.295686	0.0413061	0.921946	1.42e-20
	cg18603577	RILPL2	NM_145058	-0.295565	0.0413931	0.806067	4.76e-12
	cg23774975	RHOG	NM_001665	-0.295521	0.0414248	0.873625	5.42e-16
	cg19557110	ANKFY1	NM_016376	-0.295495	0.0414433	0.836519	1.33e-13
	cg18276112	FOXK1	NM_001037165	-0.295455	0.0414724	0.857022	7.69e-15
	cg13033086	TCF12;TCF12;TCF12;TCF12	NM_003205;NM_207037;NM_207036;NM_207038	-0.295397	0.0415137	0.929046	1.71e-21
	cg25444339	HIP1	NM_005338	-0.295379	0.0415273	0.940009	4.07e-23
	cg07223106	PCNXL2	NM_014801	-0.295364	0.0415377	0.92391	8.09e-21
	cg18064468			-0.295059	0.0417586	0.840462	7.93e-14
	cg21742790			-0.294966	0.0418265	0.963996	4.19e-28
	cg08594651			-0.294926	0.041855	0.870144	9.74e-16
	cg09734011	PCDH24	NM_017675	-0.2948	0.0419466	0.876974	3.03e-16
	cg11586034	VPS45	NM_007259	-0.294651	0.0420553	0.821543	8.41e-13
	cg10338518	AFF1	NM_001166693	-0.294356	0.0422714	0.933381	4.22e-22
	cg17593384	AFF1;AFF1	NM_001166693;NM_005935	-0.29434	0.042283	0.942706	1.45e-23
	cg17209188	IGF2BP3	NM_006547	-0.294263	0.0423395	0.91539	8.46e-20
	cg17785202			-0.293763	0.0427074	0.868276	1.32e-15
	cg13524037	HLA-DMB	NM_002118	-0.29365	0.0427916	0.916258	6.74e-20
	cg08120023	C1orf203;ATP1A1;ATP1A1;ATP1A1;C1orf203	NR_027646;NM_001160233;NM_001160234;NM_000701;NR_027645	-0.293599	0.0428289	0.814123	1.97e-12
	cg21991396	NLRP3;NLRP3;NLRP3;NLRP3;NLRP3;NLRP3;NLRP3;NLRP3	NM_001127462;NM_001079821;NM_183395;NM_183395;NM_004895;NM_004895;NM_001127461;NM_001127462	-0.293246	0.0430911	0.93711	1.17e-22
	cg07563400	ADORA2B	NM_000676	-0.293086	0.0432108	0.830082	3e-13
	cg23353000	LSM12	NM_152344	-0.29283	0.0434019	0.915932	7.34e-20
	cg12057242	CPSF3	NM_016207	-0.292464	0.0436764	0.908341	4.93e-19
	cg09128944			-0.292456	0.0436824	0.890911	2.23e-17
	cg00615241	PRTN3	NM_002777	-0.292309	0.0437934	0.910792	2.72e-19
	cg27553947	CLSTN1;CLSTN1	NM_001009566;NM_014944	-0.292164	0.043903	0.842586	5.97e-14
	cg12939085	PPP1CA;PPP1CA;PPP1CA	NM_001008709;NM_206873;NM_002708	-0.291414	0.0444726	0.902186	2.06e-18
	cg23416081	FKBP5	NM_001145775	-0.291159	0.044668	0.936004	1.72e-22
	cg01441777	CSNK1E;CSNK1E	NM_001894;NM_152221	-0.290997	0.044792	0.890504	2.42e-17
	cg26161997			-0.290765	0.0449709	0.879518	1.93e-16
	cg09417547			-0.290623	0.0450807	0.937442	1.04e-22
	cg18637761	PITPNM2	NM_020845	-0.290602	0.0450968	0.890509	2.42e-17
	cg21779301	SCRN1;SCRN1;SCRN1;SCRN1	NM_014766;NM_001145513;NM_001145514;NM_001145515	-0.290512	0.0451662	0.851027	1.85e-14
	cg20641026	PIP4K2A	NM_005028	-0.290232	0.045383	0.91414	1.17e-19
	cg01551258	RHOT1;ARGFXP2;RHOT1;RHOT1	NM_001033568;NR_002222;NM_018307;NM_001033566	-0.290162	0.0454373	0.926151	4.17e-21
	cg17207736	SLC45A4	NM_001080431	-0.290002	0.0455625	0.815555	1.68e-12
	cg23702848	XRCC3;XRCC3;XRCC3	NM_001100119;NM_005432;NM_001100118	-0.289907	0.0456365	0.818256	1.23e-12
	cg21685770	OLR1	NM_002543	-0.289843	0.0456865	0.930295	1.16e-21
	cg04797885			-0.289808	0.0457138	0.869867	1.02e-15
	cg14436426	OPRL1;RGS19;OPRL1	NM_000913;NM_001039467;NM_182647	-0.289802	0.0457181	0.847145	3.2e-14
	cg09273112	VPS24;VPS24	NM_001005753;NM_016079	-0.289793	0.0457252	0.893325	1.37e-17
	cg07958192	TIGD2;TIGD2	NM_145715;NM_145715	-0.289753	0.0457563	0.874207	4.91e-16
	cg06010437			-0.289656	0.0458323	0.900444	3.03e-18
	cg02039171	CEBPE	NM_001805	-0.28965	0.0458373	0.931781	7.15e-22
	cg26184474	KIF2A;KIF2A	NM_001098511;NM_004520	-0.289535	0.0459269	0.928305	2.16e-21
	cg25133130	MAP3K6	NM_004672	-0.289425	0.0460137	0.929554	1.46e-21
	cg22862005	SLC26A9;SLC26A9;SLC26A9	NM_052934;NM_001142600;NM_134325	-0.289422	0.0460163	0.911903	2.06e-19
	cg02840585	PRKCZ;PRKCZ;PRKCZ	NM_001033581;NM_001033582;NM_002744	-0.289203	0.0461879	0.904975	1.09e-18
	cg16396191	KIAA0564	NM_015058	-0.289045	0.0463127	0.912113	1.96e-19
	cg09163720	INPP5A	NM_005539	-0.289018	0.0463343	0.910361	3.02e-19
	cg09238666	TK2	NM_004614	-0.28899	0.0463563	0.818266	1.23e-12
	cg22514173			-0.288988	0.0463581	0.851624	1.7e-14
	cg14851700	GLUL;GLUL	NM_001033044;NM_002065	-0.288752	0.0465444	0.859758	5.09e-15
	cg22094071	FAM82B	NM_016033	-0.288507	0.046739	0.931411	8.06e-22
	cg02215171	HERC5	NM_016323	-0.288297	0.0469064	0.836825	1.28e-13
	cg10392172	BATF2	NM_138456	-0.288243	0.0469493	0.801609	7.63e-12
	cg21341487	GTPBP5	NM_015666	-0.288243	0.0469497	0.940574	3.29e-23
	cg13480197			-0.288203	0.0469818	0.954248	9.32e-26
	cg24175188	PXK	NM_017771	-0.288124	0.0470443	0.844818	4.41e-14
	cg14349937	RNLS;RNLS	NM_001031709;NM_018363	-0.288091	0.0470714	0.882022	1.22e-16
	cg00842918	GAS7;GAS7	NM_201432;NM_201433	-0.287461	0.0475773	0.928572	1.99e-21
	cg16776035			-0.287244	0.0477527	0.908372	4.9e-19
	cg27342333	POR	NM_000941	-0.287063	0.047899	0.902672	1.84e-18
	cg04774822	NADSYN1	NM_018161	-0.287035	0.0479224	0.856058	8.88e-15
	cg02127980	RXRA	NM_002957	-0.286903	0.048029	0.928705	1.91e-21
	cg01565508	PIK3R5	NM_001142633	-0.28688	0.0480479	0.922752	1.13e-20
	cg07572909	SLC16A1;SLC16A1	NM_001166496;NM_003051	-0.286463	0.0483883	0.809442	3.31e-12
	cg23090046	KLC1;KLC1;KLC1	NM_005552;NM_182923;NM_001130107	-0.28646	0.048391	0.9358	1.85e-22
	cg26528311	FHL3	NM_004468	-0.286376	0.0484591	0.836475	1.34e-13
	cg03452895	GCA	NM_012198	-0.286343	0.0484863	0.916466	6.38e-20
	cg03331229	MMP13	NM_002427	-0.286191	0.048611	0.874174	4.93e-16
	cg19223064			-0.286093	0.0486918	0.845207	4.18e-14
	cg02769705	TMEM183B;TMEM183A	NM_001079809;NM_138391	-0.286023	0.0487492	0.916524	6.28e-20
	cg07744502	C11orf75	NM_020179	-0.285951	0.0488086	0.905731	9.14e-19
	cg27307183	CDYL;CDYL;CDYL;CDYL	NM_001143970;NM_004824;NR_026590;NM_001143971	-0.285883	0.0488651	0.865464	2.09e-15
	cg09540612	C20orf135	NM_080622	-0.285854	0.0488884	0.84836	2.7e-14
	cg17129188	NDRG1;NDRG1	NM_001135242;NM_006096	-0.285794	0.0489382	0.884349	7.95e-17
	cg17657707	ARFGEF2	NM_006420	-0.285582	0.0491133	0.917818	4.45e-20
	cg19348484	FURIN	NM_002569	-0.285549	0.0491408	0.864231	2.54e-15
	cg16348358	LCK	NM_005356	-0.285542	0.0491469	0.92852	2.02e-21
	cg23232188	EAF2	NM_018456	-0.285288	0.0493578	0.90925	3.96e-19
	cg15825027			-0.285177	0.0494495	0.882524	1.12e-16
	cg08615650	ADRBK1	NM_001619	-0.285104	0.0495109	0.917409	4.96e-20
	cg25389087	MBP;MBP	NM_001025101;NM_001025100	-0.285103	0.0495111	0.885221	6.74e-17
	cg19351604	ARHGEF10	NM_014629	-0.284991	0.0496052	0.914182	1.16e-19
	cg17291166			-0.28493	0.0496558	0.929915	1.3e-21
	cg07239938	ELANE	NM_001972	-0.284845	0.0497268	0.89873	4.4e-18
	cg27513339			-0.284797	0.0497667	0.823541	6.64e-13
	cg19420720	P4HB	NM_000918	-0.284659	0.0498826	0.82553	5.23e-13
	cg25140783	RCAN3	NM_013441	0.284965	0.0496266	-0.936089	1.67e-22
	cg20146241	RCAN3	NM_013441	0.285667	0.0490429	-0.847224	3.16e-14
	cg19510565	LAPTM5	NM_006762	0.292022	0.0440104	-0.81775	1.31e-12
	cg04450994	SLC22A23;SLC22A23	NM_021945;NM_015482	0.301744	0.0371331	-0.838565	1.02e-13
	cg00010672			0.316669	0.0283151	-0.831441	2.53e-13
	cg20267828	THEMIS;THEMIS;THEMIS	NM_001164687;NM_001010923;NM_001164685	0.352961	0.0138667	-0.872626	6.42e-16
Turquoise module -ApoB100	cg17053201	GABBR1;GABBR1;GABBR1	NM_021904;NM_021903;NM_001470	-0.461645	0.000957361	0.821553	8.4e-13
	cg21671607	RAG2;C11orf74	NM_000536;NM_138787	-0.458248	0.00105538	0.84103	7.35e-14
	cg07665923	C7orf50;C7orf50;C7orf50	NM_001134396;NM_032350;NM_001134395	-0.457532	0.00107714	0.832487	2.22e-13
	cg03029090	LIPC	NM_000236	-0.456866	0.00109773	0.861814	3.71e-15
	cg26023268	CPSF4L	NM_001129885	-0.44367	0.00158558	0.817242	1.38e-12
	cg06142108	SYT17	NM_016524	-0.443114	0.00160979	0.880076	1.75e-16
	cg00211174	MCM2	NM_004526	-0.434749	0.00201651	0.916245	6.76e-20
	cg00000029	RBL2	NM_005611	-0.434141	0.00204933	0.828947	3.45e-13
	cg24586978	DOCK9;DOCK9;DOCK9;DOCK9	NM_015296;NM_001130050;NM_001130049;NM_001130048	-0.434014	0.00205629	0.872187	6.92e-16
	cg21271945	PRKCZ;PRKCZ;PRKCZ	NM_001033581;NM_001033582;NM_002744	-0.432792	0.00212391	0.871809	7.37e-16
	cg00543769			-0.430323	0.00226661	0.855763	9.28e-15
	cg01905773	TMEM105	NM_178520	-0.428297	0.00238995	0.884497	7.73e-17
	cg11731437			-0.427269	0.00245485	0.89228	1.69e-17
	cg06067425			-0.424219	0.00265645	0.838901	9.74e-14
	cg10380312	ARHGEF7;ARHGEF7;ARHGEF7;ARHGEF7;ARHGEF7	NM_001113511;NM_001113513;NM_003899;NM_001113512;NM_145735	-0.422921	0.00274662	0.820639	9.35e-13
	cg05654163	SLC39A2;SLC39A2	NM_014579;NM_014579	-0.422574	0.00277116	0.853377	1.32e-14
	cg09178384	SH3RF1	NM_020870	-0.422034	0.00280973	0.861852	3.68e-15
	cg00214688	ITGB1;ITGB1;ITGB1;ITGB1;ITGB1;ITGB1	NM_033668;NM_133376;NM_002211;NM_033667;NM_033669;NM_033666	-0.419777	0.00297631	0.803906	5.99e-12
	cg02119755	PDPK1;PDPK1	NM_031268;NM_002613	-0.418916	0.00304204	0.867041	1.62e-15
	cg03707168	PPP1R15A	NM_014330	-0.41838	0.00308366	0.860672	4.42e-15
	cg17416793	KCNQ1;KCNQ1	NM_000218;NM_181798	-0.416987	0.0031941	0.870338	9.43e-16
	cg03411376	TRPM5	NM_014555	-0.416882	0.0032026	0.807596	4.04e-12
	cg13670898			-0.416431	0.0032392	0.824369	6.02e-13
	cg15210526	MPZL1;MPZL1;MPZL1	NM_001146191;NM_003953;NM_024569	-0.415724	0.00329726	0.895407	8.91e-18
	cg09910856	ARHGAP10	NM_024605	-0.415291	0.00333331	0.807199	4.22e-12
	cg12707346			-0.41478	0.00337623	0.910505	2.92e-19
	cg17327067	PLEC1;PLEC1;PLEC1;PLEC1	NM_000445;NM_201378;NM_201379;NM_201380	-0.414272	0.00341946	0.852121	1.58e-14
	cg01441127	MR1	NM_001531	-0.411035	0.0037063	0.894028	1.19e-17
	cg20708305	CPNE9	NM_153635	-0.409717	0.00382897	0.819731	1.04e-12
	cg18809074	FAR2	NM_018099	-0.409622	0.00383801	0.814203	1.95e-12
	cg23260754			-0.408784	0.00391803	0.944066	8.49e-24
	cg05292082	TIAM1	NM_003253	-0.407513	0.00404218	0.886756	5.03e-17
	cg11220060	KLF1	NM_006563	-0.407114	0.00408184	0.884662	7.49e-17
	cg26922854			-0.406805	0.00411285	0.889156	3.16e-17
	cg09695851			-0.406469	0.00414675	0.893075	1.44e-17
	cg12593793			-0.405755	0.00421963	0.897467	5.77e-18
	cg07349663	COPA;COPA	NM_004371;NM_001098398	-0.40425	0.00437692	0.94232	1.69e-23
	cg24197477	TMEM183B;TMEM183A	NM_001079809;NM_138391	-0.403396	0.00446842	0.899845	3.45e-18
	cg13785123	ENO1	NM_001428	-0.403145	0.00449571	0.881579	1.33e-16
	cg06853894	TNFRSF8;TNFRSF8	NM_001243;NM_152942	-0.402101	0.00461045	0.874728	4.49e-16
	cg25723459	ST3GAL4	NM_006278	-0.401969	0.00462518	0.900936	2.72e-18
	cg22396850	AARSD1;AARSD1;AARSD1;AARSD1	NM_001142653;NM_025267;NM_001142654;NM_001136042	-0.401942	0.00462812	0.944383	7.48e-24
	cg07461572			-0.401601	0.00466638	0.833308	2e-13
	cg00510149	MRVI1;MRVI1;MRVI1;MRVI1	NM_001100163;NM_001098579;NM_130385;NM_001100167	-0.400785	0.00475879	0.893212	1.4e-17
	cg01280180	TXNDC6	NM_178130	-0.400556	0.00478507	0.841085	7.3e-14
	cg03258139	SMARCA2;SMARCA2	NM_003070;NM_139045	-0.399264	0.0049354	0.853792	1.24e-14
[truncated: 737 more rows]
